# Supplementary material
Source: publisher figshare collection journal article supplement (https://future-science-group.figshare.com/articles/dataset/_/20495313)
Supplement: Supplementary file 1 [file 1]

## Sheet: T1 Code List
Supplementary material 2: International Classification of Diseases, Ninth and Tenth Revision (ICD-9/10), Current Procedural Terminology (CPT), Healthcare Common Procedure Coding System (HCPCS) and RxNorm codes used for inclusion/exclusion in the study.
Code Description	Code Type	Code
ALBUMIN LABORATORY TESTING
ALBUMIN; SERUM, PLASMA OR WHOLE BLOOD	CPT	82040
ALBUMIN; SERUM, PLASMA OR WHOLE BLOOD	LOINC	1751-7
ANTIBIOTICS
Intravenous antibiotics
LINEZOLID INJ P/200MG	HCPCS	C9001
INJECTION, PLAZOMICIN, 5 MG	HCPCS	C9039
INJECTION, OMADACYCLINE, 1 MG	HCPCS	C9051
INJECTION, LEFAMULIN (XENLETA), 1 MG	HCPCS	C9054
INJECTION, DAPTOMYCIN, PER 1 MG	HCPCS	C9124
INJECTION, TIGECYCLINE, PER 1 MG	HCPCS	C9228
INJECTION, DORIPENEM, 10 MG	HCPCS	C9241
INJECTION, TELAVANCIN, 10 MG	HCPCS	C9258
INJECTION, CEFTAROLINE FOSAMIL, 10 MG	HCPCS	C9282
INJECTION, DALBAVANCIN, 10 MG	HCPCS	C9443
INJECTION, ORITAVANCIN, 10 MG	HCPCS	C9444
INJECTION, TEDIZOLID PHOSPHATE, 1 MG	HCPCS	C9446
INJECTION, DELAFLOXACIN, 1 MG	HCPCS	C9462
INJECTION, OMADACYCLINE, 1 MG	HCPCS	J0121
INJECTION, ERAVACYCLINE, 1 MG	HCPCS	J0122
INJECTION, PLAZOMICIN, 5 MG	HCPCS	J0291
INJECTION, AZITHROMYCIN, 500 MG	HCPCS	J0456
INJECTION, CEFTAROLINE FOSAMIL, 10 MG	HCPCS	J0712
INJECTION, CEFTAZIDIME AND AVIBACTAM, 0.5 G/0.125 G	HCPCS	J0714
INJECTION, CEFTIZOXIME SODIUM, PER 500 MG	HCPCS	J0715
INJECTION, CHLORAMPHENICOL SODIUM SUCCINATE, UP TO 1 GM	HCPCS	J0720
INJECTION, CIPROFLOXACIN FOR INTRAVENOUS INFUSION, 200 MG	HCPCS	J0744
INJECTION, COLISTIMETHATE SODIUM, UP TO 150 MG	HCPCS	J0770
INJECTION, DALBAVANCIN, 5 MG	HCPCS	J0875
INJECTION, DAPTOMYCIN, 1 MG	HCPCS	J0878
INJECTION, DORIPENEM, 10 MG	HCPCS	J1267
INJECTION, ERYTHROMYCIN LACTOBIONATE, PER 500 MG	HCPCS	J1364
INJECTION, LEVOFLOXACIN, 250 MG	HCPCS	J1956
INJECTION, LINEZOLID, 200 MG	HCPCS	J2020
INJECTION, MEROPENEM, 100 MG	HCPCS	J2185
INJECTION, MEROPENEM AND VABORBACTAM, 10MG/10MG (20MG)	HCPCS	J2186
INJECTION, MINOCYCLINE HYDROCHLORIDE, 1 MG	HCPCS	J2265
INJECTION, MOXIFLOXACIN, 100 MG	HCPCS	J2280
INJECTION, ORITAVANCIN, 10 MG	HCPCS	J2407
INJECTION, PIPERACILLIN SODIUM/TAZOBACTAM SODIUM, 1 GRAM/0.125 GRAMS (1.125 GRAMS)	HCPCS	J2543
INJECTION, QUINUPRISTIN/DALFOPRISTIN, 500 MG (150/350)	HCPCS	J2770
INJECTION, TEDIZOLID PHOSPHATE, 1 MG	HCPCS	J3090
INJECTION, TELAVANCIN, 10 MG	HCPCS	J3095
INJECTION, TIGECYCLINE, 1 MG	HCPCS	J3243
INJECTION, VANCOMYCIN HCL, 500 MG	HCPCS	J3370
INJECTION, CIPROFLOXACIN, 200 MG	HCPCS	S0024
INJECTION, METRONIDAZOLE, 500 MG	HCPCS	S0030
INJECTION, OFLOXACIN, 400 MG	HCPCS	S0034
INJECTION, SULFAMETHOXAZOLE AND TRIMETHOPRIM, 10 ML	HCPCS	S0039
INJECTION, TICARCILLIN DISODIUM AND CLAVULANATE POTASSIUM, 3.1 GRAMS	HCPCS	S0040
ceftaroline fosamil	RxNorm	1040004
Ticarcillin	RxNorm	10591
doripenem	RxNorm	119771
dalbavancin	RxNorm	1539239
oritavancin	RxNorm	1547611
ceftolozane	RxNorm	1597609
plazomicin	RxNorm	2049549
eravacycline	RxNorm	2055906
Ceftizoxime	RxNorm	2192
Daptomycin	RxNorm	22299
cefiderocol	RxNorm	2265702
Chloramphenicol	RxNorm	2348
Erythromycin	RxNorm	24347
meropenem	RxNorm	29561
drotrecogin alfa	RxNorm	352374
tigecycline	RxNorm	384455
telavancin	RxNorm	473837
Imipenem	RxNorm	5690
Piperacillin	RxNorm	8339
Oral antbiotics
Sulfadiazine	RxNorm	10171
Sulfisoxazole	RxNorm	10207
Tetracycline	RxNorm	10395
Tinidazole	RxNorm	10612
Trimethoprim	RxNorm	10829
fidaxomicin	RxNorm	1111103
bedaquiline	RxNorm	1364504
gemifloxacin	RxNorm	138099
cefprozil	RxNorm	19552
cefpodoxime	RxNorm	20489
ceftibuten	RxNorm	20492
Sarecycline	RxNorm	2059018
Erythromycin	RxNorm	206075
Erythromycin	RxNorm	206078
Erythromycin	RxNorm	206080
Clarithromycin	RxNorm	21212
Cefaclor	RxNorm	2176
Cefadroxil	RxNorm	2177
pretomanid	RxNorm	2198359
Cephalexin	RxNorm	2231
Erythromycin Stearate Salt	RxNorm	24351
Cefixime	RxNorm	25033
cefdinir	RxNorm	25037
Clindamycin HCL	RxNorm	2582
Cloxacillin	RxNorm	2625
telithromycin	RxNorm	274786
Cycloserine	RxNorm	3007
Erythromycin 250 MG Delayed Release Oral Capsule	RxNorm	310154
Erythromycin	RxNorm	310155
Erythromycin	RxNorm	310157
Dapsone	RxNorm	3108
Erythromycin	RxNorm	315090
Demeclocycline	RxNorm	3154
Dicloxacillin	RxNorm	3356
rifapentine	RxNorm	35617
rifaximin	RxNorm	35619
Erythromycin Stearate Salt	RxNorm	4056
Ethambutol	RxNorm	4110
Ethionamide	RxNorm	4127
Rifabutin	RxNorm	55672
Erythromycin 250 MG Delayed Release Oral Capsule	RxNorm	598008
Amoxicillin	RxNorm	723
Neomycin	RxNorm	7299
Norfloxacin	RxNorm	7517
Ofloxacin	RxNorm	7623
aminosalicylic acid	RxNorm	7833
Penicillin V	RxNorm	7984
cefditoren	RxNorm	83682
Pyrazinamide	RxNorm	8987
Clindamycin oral liquid – palmitate HCl salt	RxNorm	91075
Neither oral nor IV antibiotics
INJECTION, PENICILLIN G BENZATHINE AND PENICILLIN G PROCAINE, UP TO 600,000 UNITS	HCPCS	J0530
INJECTION, PENICILLIN G BENZATHINE AND PENICILLIN G PROCAINE, UP TO 1,200,000 UNITS	HCPCS	J0540
INJECTION, PENICILLIN G BENZATHINE AND PENICILLIN G PROCAINE, UP TO 2,400,000 UNITS	HCPCS	J0550
INJECTION, PENICILLIN G BENZATHINE AND PENICILLIN G PROCAINE, 100,000 UNITS	HCPCS	J0558
INJECTION, PENICILLIN G BENZATHINE AND PENICILLIN G PROCAINE, 2500 UNITS	HCPCS	J0559
INJECTION, PENICILLIN G BENZATHINE, UP TO 600,000 UNITS	HCPCS	J0560
INJECTION, PENICILLIN G BENZATHINE, 100,000 UNITS	HCPCS	J0561
INJECTION, PENICILLIN G BENZATHINE, UP TO 2,400,000 UNITS	HCPCS	J0580
INJECTION, PENICILLIN G PROCAINE, AQUEOUS, UP TO 600,000 UNITS	HCPCS	J2510
INJECTION, STREPTOMYCIN, UP TO 1 GM	HCPCS	J3000
Tobramycin, inhalation solution, fda-approved final product, non-compounded, unit dose form, administered through dme, per 300 milligrams	HCPCS	J7682
Tobramycin, inhalation solution, compounded product, administered through dme, unit dose form, per 300 milligrams	HCPCS	J7685
Bacitracin	RxNorm	1291
amikacin liposomal	RxNorm	2059180
Sometimes oral antibiotics
isoniazid	RxNorm	6038
Sometimes IV
INJECTION, ERTAPENEM SODIUM, PER 1 GRAM VIAL	HCPCS	C9116
INJECTION, TETRACYCLINE, UP TO 250 MG	HCPCS	J0120
INJECTION, AMIKACIN SULFATE, 100 MG	HCPCS	J0278
INJECTION, AMPICILLIN SODIUM, 500 MG	HCPCS	J0290
INJECTION, AMPICILLIN SODIUM/SULBACTAM SODIUM, PER 1.5 GM	HCPCS	J0295
INJECTION, CEFAZOLIN SODIUM, 500 MG	HCPCS	J0690
INJECTION, CEFEPIME HYDROCHLORIDE, 500 MG	HCPCS	J0692
INJECTION, CEFOXITIN SODIUM, 1 GM	HCPCS	J0694
INJECTION, CEFTRIAXONE SODIUM, PER 250 MG	HCPCS	J0696
INJECTION, STERILE CEFUROXIME SODIUM, PER 750 MG	HCPCS	J0697
INJECTION, CEFOTAXIME SODIUM, PER GM	HCPCS	J0698
INJECTION, CEFTAZIDIME, PER 500 MG	HCPCS	J0713
INJECTION, CILASTATIN SODIUM; IMIPENEM, PER 250 MG	HCPCS	J0743
INJECTION, ERTAPENEM SODIUM, 500 MG	HCPCS	J1335
INJECTION, GARAMYCIN, GENTAMICIN, UP TO 80 MG	HCPCS	J1580
INJECTION, KANAMYCIN SULFATE, UP TO 500 MG	HCPCS	J1840
INJECTION, KANAMYCIN SULFATE, UP TO 75 MG	HCPCS	J1850
INJECTION, LINCOMYCIN HCL, UP TO 300 MG	HCPCS	J2010
INJECTION, PENICILLIN G POTASSIUM, UP TO 600,000 UNITS	HCPCS	J2540
INJECTION, OXACILLIN SODIUM, UP TO 250 MG	HCPCS	J2700
INJECTION, TOBRAMYCIN SULFATE, UP TO 80 MG	HCPCS	J3260
INJECTION, NAFCILLIN SODIUM, 2 GRAMS	HCPCS	S0032
INJECTION, AZTREONAM, 500 MG	HCPCS	S0073
INJECTION, CEFOTETAN DISODIUM, 500 MG	HCPCS	S0074
INJECTION, CLINDAMYCIN PHOSPHATE, 300 MG	HCPCS	S0077
Streptomycin	RxNorm	10109
Tobramycin	RxNorm	10627
Aztreonam	RxNorm	1272
Gentamicin Sulfate (USP) (deprecated 2017)	RxNorm	142438
Gentamicin	RxNorm	1596450
Clindamycin phosphate	RxNorm	1737230
Gentamicin	RxNorm	1870244
cefepime	RxNorm	20481
Cefazolin	RxNorm	2180
Cefotaxime	RxNorm	2186
Cefotetan	RxNorm	2187
Cefoxitin	RxNorm	2189
Ceftazidime	RxNorm	2191
Ceftriaxone	RxNorm	2193
Cefuroxime	RxNorm	2194
quinupristin	RxNorm	229367
colistimethate (deprecated 2020)	RxNorm	2708
ertapenem	RxNorm	325642
Lincomycin	RxNorm	6398
Amikacin	RxNorm	641
Nafcillin	RxNorm	7233
Oxacillin	RxNorm	7773
Capreomycin	RxNorm	78903
Penicillin G	RxNorm	7980
Polymyxin B	RxNorm	8536
clindamycin phosphate hydrate	RxNorm	OMOP4819524
IV/oral antibiotics
Ampicillin	RxNorm	733
Sulfamethoxazole	RxNorm	10180
Vancomycin	RxNorm	11124
moxifloxacin	RxNorm	139462
tedizolid	RxNorm	1540825
kanamycin A	RxNorm	1727573
Azithromycin	RxNorm	18631
linezolid	RxNorm	190376
delafloxacin	RxNorm	1927663
omadacycline	RxNorm	2059269
Lefamulin	RxNorm	2198944
Ciprofloxacin	RxNorm	2551
Doxycycline	RxNorm	3640
Erythromycin	RxNorm	4053
Kanamycin	RxNorm	6099
Metronidazole	RxNorm	6922
Minocycline	RxNorm	6980
Penicillin	RxNorm	70618
Levofloxacin	RxNorm	82122
Rifampin	RxNorm	9384
B- OR T-CELL DEPLETING THERAPIES
B-Cell Depleting Therapy
INJECTION, OBINUTUZUMAB, 10 MG	HCPCS	C9021
INJECTION, OFATUMUMAB, 10 MG	HCPCS	C9260
INJECTION, BLINATUMOMAB, 1 MCG	HCPCS	C9449
INJECTION, RITUXIMAB AND HYALURONIDASE, 10 MG	HCPCS	C9467
INJECTION, DARATUMUMAB, 10 MG	HCPCS	C9476
INJECTION, OCRELIZUMAB, 1 MG	HCPCS	C9494
Injection, alemtuzumab, 1 mg	HCPCS	J0202
Injection, belimumab, 1 mg	HCPCS	J0490
Injection, ocrelizumab, 1 mg	HCPCS	J2350
INJECTION, ALEMTUZUMAB, 10 MG	HCPCS	J9010
Injection, blinatumomab, 1 microgram	HCPCS	J9039
Injection, daratumumab, 1 mg	HCPCS	J9145
Injection, obinutuzumab, 10 mg	HCPCS	J9301
Injection, ofatumumab, 10 mg	HCPCS	J9302
INJECTION, RITUXIMAB, 100 MG	HCPCS	J9310
Injection, rituximab, 10 mg and hyaluronidase	HCPCS	J9311
Injection, rituximab, 10 mg	HCPCS	J9312
INJECTION, BELIMUMAB, 10 MG	HCPCS	Q2044
INJECTION, RITUXIMAB-ABBS, BIOSIMILAR, (TRUXIMA), 10 MG	HCPCS	Q5115
INJECTION, ALEMTUZUMAB, 1 MG	HCPCS	Q9979
Introduction of Blinatumomab Antineoplastic Immunotherapy into Peripheral Vein, Percutaneous Approach, New Technology Group 1	ICD-10 Procedure	XW03351
Introduction of Blinatumomab Antineoplastic Immunotherapy into Central Vein, Percutaneous Approach, New Technology Group 1	ICD-10 Procedure	XW04351
blinatumomab	RxNorm	1597258
belimumab	RxNorm	1092437
alemtuzumab	RxNorm	117055
rituximab	RxNorm	121191
daratumumab	RxNorm	1721947
ocrelizumab	RxNorm	1876366
ofatumumab	RxNorm	712566
obinutuzumab	RxNorm	974779
CAR-T
TISAGENLECLEUCEL, UP TO 250 MILLION CAR-POSITIVE VIABLE T CELLS, INCLUDING LEUKAPHERESIS AND DOSE PREPARATION PROCEDURES, PER INFUSION	HCPCS	Q2040
Axicabtagene ciloleucel, up to 200 million autologous anti-cd19 car positive viable t cells, including leukapheresis and dose preparation procedures, per therapeutic dose	HCPCS	Q2041
Tisagenlecleucel, up to 600 million car-positive viable t cells, including leukapheresis and dose preparation procedures, per therapeutic dose	HCPCS	Q2042
Axicabtagene ciloleucel	RxNorm	1987398
tisagenlecleucel	RxNorm	1986438
Body Mass Index	LOINC	39156-5
CHRONIC LYMPHOCYTIC LEUKEMIA
CHRONIC LYMPHOCYTIC LEUKEMIA OF B-CELL TYPE	ICD-10 Diagnosis	C91.1
CHRONIC LYMPHOCYTIC LEUKEMIA OF B-CELL TYPE NOT HAVING ACHIEVED REMISSION	ICD-10 Diagnosis	C91.10
CHRONIC LYMPHOCYTIC LEUKEMIA OF B-CELL TYPE IN REMISSION	ICD-10 Diagnosis	C91.11
CHRONIC LYMPHOCYTIC LEUKEMIA OF B-CELL TYPE IN RELAPSE	ICD-10 Diagnosis	C91.12
LYMPHOID LEUKEMIA, CHRONIC	ICD-9 Diagnosis	204.1
CHRONIC LYMPHOID LEUKEMIA, WITHOUT MENTION OF HAVING ACHIEVED REMISSION	ICD-9 Diagnosis	204.10
LYMPHOID LEUKEMIA, CHRONIC, IN REMISSION	ICD-9 Diagnosis	204.11
CHRONIC LYMPHOID LEUKEMIA, IN RELAPSE	ICD-9 Diagnosis	204.12
Chronic lymphocytic leukemia/small lymphocytic lymphoma	ICD-O-3 Morphology	9823/[1 or 3]
COMORBIDITIES
Asthma
ASTHMA	ICD-10 Diagnosis	J45
MILD INTERMITTENT ASTHMA	ICD-10 Diagnosis	J45.2
MILD INTERMITTENT ASTHMA, UNCOMPLICATED	ICD-10 Diagnosis	J45.20
MILD INTERMITTENT ASTHMA WITH (ACUTE) EXACERBATION	ICD-10 Diagnosis	J45.21
MILD INTERMITTENT ASTHMA WITH STATUS ASTHMATICUS	ICD-10 Diagnosis	J45.22
MILD PERSISTENT ASTHMA	ICD-10 Diagnosis	J45.3
MILD PERSISTENT ASTHMA, UNCOMPLICATED	ICD-10 Diagnosis	J45.30
MILD PERSISTENT ASTHMA WITH (ACUTE) EXACERBATION	ICD-10 Diagnosis	J45.31
MILD PERSISTENT ASTHMA WITH STATUS ASTHMATICUS	ICD-10 Diagnosis	J45.32
MODERATE PERSISTENT ASTHMA	ICD-10 Diagnosis	J45.4
MODERATE PERSISTENT ASTHMA, UNCOMPLICATED	ICD-10 Diagnosis	J45.40
MODERATE PERSISTENT ASTHMA WITH (ACUTE) EXACERBATION	ICD-10 Diagnosis	J45.41
MODERATE PERSISTENT ASTHMA WITH STATUS ASTHMATICUS	ICD-10 Diagnosis	J45.42
SEVERE PERSISTENT ASTHMA	ICD-10 Diagnosis	J45.5
SEVERE PERSISTENT ASTHMA, UNCOMPLICATED	ICD-10 Diagnosis	J45.50
SEVERE PERSISTENT ASTHMA WITH (ACUTE) EXACERBATION	ICD-10 Diagnosis	J45.51
SEVERE PERSISTENT ASTHMA WITH STATUS ASTHMATICUS	ICD-10 Diagnosis	J45.52
OTHER AND UNSPECIFIED ASTHMA	ICD-10 Diagnosis	J45.9
UNSPECIFIED ASTHMA	ICD-10 Diagnosis	J45.90
UNSPECIFIED ASTHMA WITH (ACUTE) EXACERBATION	ICD-10 Diagnosis	J45.901
UNSPECIFIED ASTHMA WITH STATUS ASTHMATICUS	ICD-10 Diagnosis	J45.902
UNSPECIFIED ASTHMA, UNCOMPLICATED	ICD-10 Diagnosis	J45.909
OTHER ASTHMA	ICD-10 Diagnosis	J45.99
EXERCISE INDUCED BRONCHOSPASM	ICD-10 Diagnosis	J45.990
COUGH VARIANT ASTHMA	ICD-10 Diagnosis	J45.991
OTHER ASTHMA	ICD-10 Diagnosis	J45.998
ASTHMA	ICD-9 Diagnosis	493
EXTRINSIC ASTHMA	ICD-9 Diagnosis	493.0
EXTRINSIC ASTHMA, UNSPECIFIED	ICD-9 Diagnosis	493.00
EXTRINSIC ASTHMA WITH STATUS ASTHMATICUS	ICD-9 Diagnosis	493.01
EXTRINSIC ASTHMA, WITH (ACUTE) EXACERBATION	ICD-9 Diagnosis	493.02
INTRINSIC ASTHMA	ICD-9 Diagnosis	493.1
INTRINSIC ASTHMA, UNSPECIFIED	ICD-9 Diagnosis	493.10
INTRINSIC ASTHMA WITH STATUS ASTHMATICUS	ICD-9 Diagnosis	493.11
INTRINSIC ASTHMA, WITH (ACUTE) EXACERBATION	ICD-9 Diagnosis	493.12
CHRONIC OBSTRUCTIVE ASTHMA	ICD-9 Diagnosis	493.2
CHRONIC OBSTRUCTIVE ASTHMA, UNSPECIFIED	ICD-9 Diagnosis	493.20
CHRONIC OBSTRUCTIVE ASTHMA WITH STATUS ASTHMATICUS	ICD-9 Diagnosis	493.21
CHRONIC OBSTRUCTIVE ASTHMA, WITH (ACUTE) EXACERBATION	ICD-9 Diagnosis	493.22
OTHER FORMS OF ASTHMA	ICD-9 Diagnosis	493.8
EXERCISE INDUCED BRONCHOSPASM	ICD-9 Diagnosis	493.81
COUGH VARIANT ASTHMA	ICD-9 Diagnosis	493.82
ASTHMA, UNSPECIFIED	ICD-9 Diagnosis	493.9
ASTHMA, UNSPECIFIED TYPE, UNSPECIFIED	ICD-9 Diagnosis	493.90
ASTHMA, UNSPECIFIED TYPE, WITH STATUS ASTHMATICUS	ICD-9 Diagnosis	493.91
ASTHMA, UNSPECIFIED TYPE, WITH (ACUTE) EXACERBATION	ICD-9 Diagnosis	493.92
Congestive Heart Failure
RHEUMATIC HEART FAILURE	ICD-10 Diagnosis	I09.81
HYPERTENSIVE HEART DISEASE WITH HEART FAILURE	ICD-10 Diagnosis	I11.0
HYPERTENSIVE HEART AND CHRONIC KIDNEY DISEASE WITH HEART FAILURE AND STAGE 1 THROUGH STAGE 4 CHRONIC KIDNEY DISEASE, OR UNSPECIFIED CHRONIC KIDNEY DISEASE	ICD-10 Diagnosis	I13.0
HYPERTENSIVE HEART AND CHRONIC KIDNEY DISEASE WITH HEART FAILURE AND WITH STAGE 5 CHRONIC KIDNEY DISEASE, OR END STAGE RENAL DISEASE	ICD-10 Diagnosis	I13.2
HEART FAILURE	ICD-10 Diagnosis	I50
LEFT VENTRICULAR FAILURE, UNSPECIFIED	ICD-10 Diagnosis	I50.1
SYSTOLIC (CONGESTIVE) HEART FAILURE	ICD-10 Diagnosis	I50.2
UNSPECIFIED SYSTOLIC (CONGESTIVE) HEART FAILURE	ICD-10 Diagnosis	I50.20
ACUTE SYSTOLIC (CONGESTIVE) HEART FAILURE	ICD-10 Diagnosis	I50.21
CHRONIC SYSTOLIC (CONGESTIVE) HEART FAILURE	ICD-10 Diagnosis	I50.22
ACUTE ON CHRONIC SYSTOLIC (CONGESTIVE) HEART FAILURE	ICD-10 Diagnosis	I50.23
DIASTOLIC (CONGESTIVE) HEART FAILURE	ICD-10 Diagnosis	I50.3
UNSPECIFIED DIASTOLIC (CONGESTIVE) HEART FAILURE	ICD-10 Diagnosis	I50.30
ACUTE DIASTOLIC (CONGESTIVE) HEART FAILURE	ICD-10 Diagnosis	I50.31
CHRONIC DIASTOLIC (CONGESTIVE) HEART FAILURE	ICD-10 Diagnosis	I50.32
ACUTE ON CHRONIC DIASTOLIC (CONGESTIVE) HEART FAILURE	ICD-10 Diagnosis	I50.33
COMBINED SYSTOLIC (CONGESTIVE) AND DIASTOLIC (CONGESTIVE) HEART FAILURE	ICD-10 Diagnosis	I50.4
UNSPECIFIED COMBINED SYSTOLIC (CONGESTIVE) AND DIASTOLIC (CONGESTIVE) HEART FAILURE	ICD-10 Diagnosis	I50.40
ACUTE COMBINED SYSTOLIC (CONGESTIVE) AND DIASTOLIC (CONGESTIVE) HEART FAILURE	ICD-10 Diagnosis	I50.41
CHRONIC COMBINED SYSTOLIC (CONGESTIVE) AND DIASTOLIC (CONGESTIVE) HEART FAILURE	ICD-10 Diagnosis	I50.42
ACUTE ON CHRONIC COMBINED SYSTOLIC (CONGESTIVE) AND DIASTOLIC (CONGESTIVE) HEART FAILURE	ICD-10 Diagnosis	I50.43
OTHER HEART FAILURE	ICD-10 Diagnosis	I50.8
RIGHT HEART FAILURE	ICD-10 Diagnosis	I50.81
RIGHT HEART FAILURE, UNSPECIFIED	ICD-10 Diagnosis	I50.810
ACUTE RIGHT HEART FAILURE	ICD-10 Diagnosis	I50.811
CHRONIC RIGHT HEART FAILURE	ICD-10 Diagnosis	I50.812
ACUTE ON CHRONIC RIGHT HEART FAILURE	ICD-10 Diagnosis	I50.813
RIGHT HEART FAILURE DUE TO LEFT HEART FAILURE	ICD-10 Diagnosis	I50.814
BIVENTRICULAR HEART FAILURE	ICD-10 Diagnosis	I50.82
HIGH OUTPUT HEART FAILURE	ICD-10 Diagnosis	I50.83
END STAGE HEART FAILURE	ICD-10 Diagnosis	I50.84
OTHER HEART FAILURE	ICD-10 Diagnosis	I50.89
HEART FAILURE, UNSPECIFIED	ICD-10 Diagnosis	I50.9
RHEUMATIC HEART FAILURE (CONGESTIVE)	ICD-9 Diagnosis	398.91
MALIGNANT HYPERTENSIVE HEART DISEASE WITH CONGESTIVE HEART FAILURE	ICD-9 Diagnosis	402.01
BENIGN HYPERTENSIVE HEART DISEASE WITH CONGESTIVE HEART FAILURE	ICD-9 Diagnosis	402.11
UNSPECIFIED HYPERTENSIVE HEART DISEASE WITH CONGESTIVE HEART FAILURE	ICD-9 Diagnosis	402.91
HYPERTENSIVE HEART AND CHRONIC KIDNEY DISEASE, MALIGNANT, WITH HEART FAILURE AND WITH CHRONIC KIDNEY DISEASE STAGE I THROUGH STAGE IV, OR UNSPECIFIED	ICD-9 Diagnosis	404.01
HYPERTENSIVE HEART AND CHRONIC KIDNEY DISEASE, MALIGNANT, WITH HEART FAILURE AND WITH CHRONIC KIDNEY DISEASE STAGE V OR END STAGE RENAL DISEASE	ICD-9 Diagnosis	404.03
HYPERTENSIVE HEART AND CHRONIC KIDNEY DISEASE, BENIGN, WITH HEART FAILURE AND WITH CHRONIC KIDNEY DISEASE STAGE I THROUGH STAGE IV, OR UNSPECIFIED	ICD-9 Diagnosis	404.11
HYPERTENSIVE HEART AND CHRONIC KIDNEY DISEASE, BENIGN, WITH HEART FAILURE AND CHRONIC KIDNEY DISEASE STAGE V OR END STAGE RENAL DISEASE	ICD-9 Diagnosis	404.13
HYPERTENSIVE HEART AND CHRONIC KIDNEY DISEASE, UNSPECIFIED, WITH HEART FAILURE AND WITH CHRONIC KIDNEY DISEASE STAGE I THROUGH STAGE IV, OR UNSPECIFIED	ICD-9 Diagnosis	404.91
HYPERTENSIVE HEART AND CHRONIC KIDNEY DISEASE, UNSPECIFIED, WITH HEART FAILURE AND CHRONIC KIDNEY DISEASE STAGE V OR END STAGE RENAL DISEASE	ICD-9 Diagnosis	404.93
HEART FAILURE	ICD-9 Diagnosis	428
CONGESTIVE HEART FAILURE, UNSPECIFIED	ICD-9 Diagnosis	428.0
LEFT HEART FAILURE	ICD-9 Diagnosis	428.1
SYSTOLIC HEART FAILURE	ICD-9 Diagnosis	428.2
UNSPECIFIED SYSTOLIC HEART FAILURE	ICD-9 Diagnosis	428.20
ACUTE SYSTOLIC HEART FAILURE	ICD-9 Diagnosis	428.21
CHRONIC SYSTOLIC HEART FAILURE	ICD-9 Diagnosis	428.22
ACUTE ON CHRONIC SYSTOLIC HEART FAILURE	ICD-9 Diagnosis	428.23
DIASTOLIC HEART FAILURE	ICD-9 Diagnosis	428.3
UNSPECIFIED DIASTOLIC HEART FAILURE	ICD-9 Diagnosis	428.30
ACUTE DIASTOLIC HEART FAILURE	ICD-9 Diagnosis	428.31
CHRONIC DIASTOLIC HEART FAILURE	ICD-9 Diagnosis	428.32
ACUTE ON CHRONIC DIASTOLIC HEART FAILURE	ICD-9 Diagnosis	428.33
COMBINED SYSTOLIC AND DIASTOLIC HEART FAILURE	ICD-9 Diagnosis	428.4
UNSPECIFIED COMBINED SYSTOLIC AND DIASTOLIC HEART FAILURE	ICD-9 Diagnosis	428.40
ACUTE COMBINED SYSTOLIC AND DIASTOLIC HEART FAILURE	ICD-9 Diagnosis	428.41
CHRONIC COMBINED SYSTOLIC AND DIASTOLIC HEART FAILURE	ICD-9 Diagnosis	428.42
ACUTE ON CHRONIC COMBINED SYSTOLIC AND DIASTOLIC HEART FAILURE	ICD-9 Diagnosis	428.43
HEART FAILURE, UNSPECIFIED	ICD-9 Diagnosis	428.9
Chronic Obstructive Pulmonary Disease
SIMPLE AND MUCOPURULENT CHRONIC BRONCHITIS	ICD-10 Diagnosis	J41
SIMPLE CHRONIC BRONCHITIS	ICD-10 Diagnosis	J41.0
MUCOPURULENT CHRONIC BRONCHITIS	ICD-10 Diagnosis	J41.1
MIXED SIMPLE AND MUCOPURULENT CHRONIC BRONCHITIS	ICD-10 Diagnosis	J41.8
UNSPECIFIED CHRONIC BRONCHITIS	ICD-10 Diagnosis	J42
EMPHYSEMA	ICD-10 Diagnosis	J43
UNILATERAL PULMONARY EMPHYSEMA [MACLEOD'S SYNDROME]	ICD-10 Diagnosis	J43.0
PANLOBULAR EMPHYSEMA	ICD-10 Diagnosis	J43.1
CENTRILOBULAR EMPHYSEMA	ICD-10 Diagnosis	J43.2
OTHER EMPHYSEMA	ICD-10 Diagnosis	J43.8
EMPHYSEMA, UNSPECIFIED	ICD-10 Diagnosis	J43.9
OTHER CHRONIC OBSTRUCTIVE PULMONARY DISEASE	ICD-10 Diagnosis	J44
CHRONIC OBSTRUCTIVE PULMONARY DISEASE WITH ACUTE LOWER RESPIRATORY INFECTION	ICD-10 Diagnosis	J44.0
CHRONIC OBSTRUCTIVE PULMONARY DISEASE WITH (ACUTE) EXACERBATION	ICD-10 Diagnosis	J44.1
CHRONIC OBSTRUCTIVE PULMONARY DISEASE, UNSPECIFIED	ICD-10 Diagnosis	J44.9
CHRONIC BRONCHITIS	ICD-9 Diagnosis	491
SIMPLE CHRONIC BRONCHITIS	ICD-9 Diagnosis	491.0
MUCOPURULENT CHRONIC BRONCHITIS	ICD-9 Diagnosis	491.1
OBSTRUCTIVE CHRONIC BRONCHITIS	ICD-9 Diagnosis	491.2
OBSTRUCTIVE CHRONIC BRONCHITIS, WITHOUT EXACERBATION	ICD-9 Diagnosis	491.20
OBSTRUCTIVE CHRONIC BRONCHITIS, WITH (ACUTE) EXACERBATION	ICD-9 Diagnosis	491.21
OBSTRUCTIVE CHRONIC BRONCHITIS WITH ACUTE BRONCHITIS	ICD-9 Diagnosis	491.22
OTHER CHRONIC BRONCHITIS	ICD-9 Diagnosis	491.8
UNSPECIFIED CHRONIC BRONCHITIS	ICD-9 Diagnosis	491.9
EMPHYSEMA	ICD-9 Diagnosis	492
EMPHYSEMATOUS BLEB	ICD-9 Diagnosis	492.0
OTHER EMPHYSEMA	ICD-9 Diagnosis	492.8
CHRONIC OBSTRUCTIVE ASTHMA	ICD-9 Diagnosis	493.2
CHRONIC OBSTRUCTIVE ASTHMA, UNSPECIFIED	ICD-9 Diagnosis	493.20
CHRONIC OBSTRUCTIVE ASTHMA WITH STATUS ASTHMATICUS	ICD-9 Diagnosis	493.21
CHRONIC OBSTRUCTIVE ASTHMA, WITH (ACUTE) EXACERBATION	ICD-9 Diagnosis	493.22
CHRONIC AIRWAY OBSTRUCTION, NOT ELSEWHERE CLASSIFIED	ICD-9 Diagnosis	496
DEMENTIA/ALZHEIMERS
VASCULAR DEMENTIA WITHOUT BEHAVIORAL DISTURBANCE	ICD-10 Diagnosis	F01.50
VASCULAR DEMENTIA WITH BEHAVIORAL DISTURBANCE	ICD-10 Diagnosis	F01.51
DEMENTIA IN OTHER DISEASES CLASSIFIED ELSEWHERE WITHOUT BEHAVIORAL DISTURBANCE	ICD-10 Diagnosis	F02.80
DEMENTIA IN OTHER DISEASES CLASSIFIED ELSEWHERE WITH BEHAVIORAL DISTURBANCE	ICD-10 Diagnosis	F02.81
UNSPECIFIED DEMENTIA WITHOUT BEHAVIORAL DISTURBANCE	ICD-10 Diagnosis	F03.90
UNSPECIFIED DEMENTIA WITH BEHAVIORAL DISTURBANCE	ICD-10 Diagnosis	F03.91
DELIRIUM DUE TO KNOWN PHYSIOLOGICAL CONDITION	ICD-10 Diagnosis	F05
SYSTEMIC ATROPHY PRIMARILY AFFECTING THE CENTRAL NERVOUS SYSTEM IN MYXEDEMA	ICD-10 Diagnosis	G13.2
SYSTEMIC ATROPHY PRIMARILY AFFECTING CENTRAL NERVOUS SYSTEM IN OTHER DISEASES CLASSIFIED ELSEWHERE	ICD-10 Diagnosis	G13.8
ALZHEIMER'S DISEASE WITH EARLY ONSET	ICD-10 Diagnosis	G30.0
ALZHEIMER'S DISEASE WITH LATE ONSET	ICD-10 Diagnosis	G30.1
OTHER ALZHEIMER'S DISEASE	ICD-10 Diagnosis	G30.8
ALZHEIMER'S DISEASE, UNSPECIFIED	ICD-10 Diagnosis	G30.9
PICK'S DISEASE	ICD-10 Diagnosis	G31.01
OTHER FRONTOTEMPORAL DEMENTIA	ICD-10 Diagnosis	G31.09
SENILE DEGENERATION OF BRAIN, NOT ELSEWHERE CLASSIFIED	ICD-10 Diagnosis	G31.1
DEGENERATION OF NERVOUS SYSTEM DUE TO ALCOHOL	ICD-10 Diagnosis	G31.2
DEMENTIA WITH LEWY BODIES	ICD-10 Diagnosis	G31.83
MILD COGNITIVE IMPAIRMENT, SO STATED	ICD-10 Diagnosis	G31.84
CORTICOBASAL DEGENERATION	ICD-10 Diagnosis	G31.85
OTHER SPECIFIED DEGENERATIVE DISEASES OF NERVOUS SYSTEM	ICD-10 Diagnosis	G31.89
DEGENERATIVE DISEASE OF NERVOUS SYSTEM, UNSPECIFIED	ICD-10 Diagnosis	G31.9
HYDROCEPHALUS IN DISEASES CLASSIFIED ELSEWHERE	ICD-10 Diagnosis	G91.4
OTHER DISORDERS OF BRAIN IN DISEASES CLASSIFIED ELSEWHERE	ICD-10 Diagnosis	G94
DEMENTIA IN CONDITIONS CLASSIFIED ELSEWHERE WITHOUT BEHAVIORAL DISTURBANCE	ICD-9 Diagnosis	294.10
DEMENTIA IN CONDITIONS CLASSIFIED ELSEWHERE WITH BEHAVIORAL DISTURBANCE	ICD-9 Diagnosis	294.11
DEMENTIA, UNSPECIFIED, WITHOUT BEHAVIORAL DISTURBANCE	ICD-9 Diagnosis	294.20
DEMENTIA, UNSPECIFIED, WITH BEHAVIORAL DISTURBANCE	ICD-9 Diagnosis	294.21
OTHER CEREBRAL DEGENERATIONS	ICD-9 Diagnosis	331
ALZHEIMER'S DISEASE	ICD-9 Diagnosis	331.0
FRONTOTEMPORAL DEMENTIA	ICD-9 Diagnosis	331.1
PICK'S DISEASE	ICD-9 Diagnosis	331.11
OTHER FRONTOTEMPORAL DEMENTIA	ICD-9 Diagnosis	331.19
SENILE DEGENERATION OF BRAIN	ICD-9 Diagnosis	331.2
COMMUNICATING HYDROCEPHALUS	ICD-9 Diagnosis	331.3
OBSTRUCTIVE HYDROCEPHALUS	ICD-9 Diagnosis	331.4
IDIOPATHIC NORMAL PRESSURE HYDROCEPHALUS (INPH)	ICD-9 Diagnosis	331.5
CORTICOBASAL DEGENERATION	ICD-9 Diagnosis	331.6
CEREBRAL DEGENERATION IN DISEASES CLASSIFIED ELSEWHERE	ICD-9 Diagnosis	331.7
OTHER CEREBRAL DEGENERATION	ICD-9 Diagnosis	331.8
DEMENTIA WITH LEWY BODIES	ICD-9 Diagnosis	331.82
MILD COGNITIVE IMPAIRMENT, SO STATED	ICD-9 Diagnosis	331.83
OTHER CEREBRAL DEGENERATION	ICD-9 Diagnosis	331.89
CEREBRAL DEGENERATION, UNSPECIFIED	ICD-9 Diagnosis	331.9
DIABETES
DIABETES MELLITUS DUE TO UNDERLYING CONDITION	ICD-10 Diagnosis	E08
DIABETES MELLITUS DUE TO UNDERLYING CONDITION WITH HYPEROSMOLARITY	ICD-10 Diagnosis	E08.0
DIABETES MELLITUS DUE TO UNDERLYING CONDITION WITH HYPEROSMOLARITY WITHOUT NONKETOTIC HYPERGLYCEMIC-HYPEROSMOLAR COMA (NKHHC)	ICD-10 Diagnosis	E08.00
DIABETES MELLITUS DUE TO UNDERLYING CONDITION WITH HYPEROSMOLARITY WITH COMA	ICD-10 Diagnosis	E08.01
DIABETES MELLITUS DUE TO UNDERLYING CONDITION WITH KETOACIDOSIS	ICD-10 Diagnosis	E08.1
DIABETES MELLITUS DUE TO UNDERLYING CONDITION WITH KETOACIDOSIS WITHOUT COMA	ICD-10 Diagnosis	E08.10
DIABETES MELLITUS DUE TO UNDERLYING CONDITION WITH KETOACIDOSIS WITH COMA	ICD-10 Diagnosis	E08.11
DIABETES MELLITUS DUE TO UNDERLYING CONDITION WITH KIDNEY COMPLICATIONS	ICD-10 Diagnosis	E08.2
DIABETES MELLITUS DUE TO UNDERLYING CONDITION WITH DIABETIC NEPHROPATHY	ICD-10 Diagnosis	E08.21
DIABETES MELLITUS DUE TO UNDERLYING CONDITION WITH DIABETIC CHRONIC KIDNEY DISEASE	ICD-10 Diagnosis	E08.22
DIABETES MELLITUS DUE TO UNDERLYING CONDITION WITH OTHER DIABETIC KIDNEY COMPLICATION	ICD-10 Diagnosis	E08.29
DIABETES MELLITUS DUE TO UNDERLYING CONDITION WITH OPHTHALMIC COMPLICATIONS	ICD-10 Diagnosis	E08.3
DIABETES MELLITUS DUE TO UNDERLYING CONDITION WITH UNSPECIFIED DIABETIC RETINOPATHY	ICD-10 Diagnosis	E08.31
DIABETES MELLITUS DUE TO UNDERLYING CONDITION WITH UNSPECIFIED DIABETIC RETINOPATHY WITH MACULAR EDEMA	ICD-10 Diagnosis	E08.311
DIABETES MELLITUS DUE TO UNDERLYING CONDITION WITH UNSPECIFIED DIABETIC RETINOPATHY WITHOUT MACULAR EDEMA	ICD-10 Diagnosis	E08.319
DIABETES MELLITUS DUE TO UNDERLYING CONDITION WITH MILD NONPROLIFERATIVE DIABETIC RETINOPATHY	ICD-10 Diagnosis	E08.32
DIABETES MELLITUS DUE TO UNDERLYING CONDITION WITH MILD NONPROLIFERATIVE DIABETIC RETINOPATHY WITH MACULAR EDEMA	ICD-10 Diagnosis	E08.321
DIABETES MELLITUS DUE TO UNDERLYING CONDITION WITH MILD NONPROLIFERATIVE DIABETIC RETINOPATHY WITH MACULAR EDEMA, RIGHT EYE	ICD-10 Diagnosis	E08.3211
DIABETES MELLITUS DUE TO UNDERLYING CONDITION WITH MILD NONPROLIFERATIVE DIABETIC RETINOPATHY WITH MACULAR EDEMA, LEFT EYE	ICD-10 Diagnosis	E08.3212
DIABETES MELLITUS DUE TO UNDERLYING CONDITION WITH MILD NONPROLIFERATIVE DIABETIC RETINOPATHY WITH MACULAR EDEMA, BILATERAL	ICD-10 Diagnosis	E08.3213
DIABETES MELLITUS DUE TO UNDERLYING CONDITION WITH MILD NONPROLIFERATIVE DIABETIC RETINOPATHY WITH MACULAR EDEMA, UNSPECIFIED EYE	ICD-10 Diagnosis	E08.3219
DIABETES MELLITUS DUE TO UNDERLYING CONDITION WITH MILD NONPROLIFERATIVE DIABETIC RETINOPATHY WITHOUT MACULAR EDEMA	ICD-10 Diagnosis	E08.329
DIABETES MELLITUS DUE TO UNDERLYING CONDITION WITH MILD NONPROLIFERATIVE DIABETIC RETINOPATHY WITHOUT MACULAR EDEMA, RIGHT EYE	ICD-10 Diagnosis	E08.3291
DIABETES MELLITUS DUE TO UNDERLYING CONDITION WITH MILD NONPROLIFERATIVE DIABETIC RETINOPATHY WITHOUT MACULAR EDEMA, LEFT EYE	ICD-10 Diagnosis	E08.3292
DIABETES MELLITUS DUE TO UNDERLYING CONDITION WITH MILD NONPROLIFERATIVE DIABETIC RETINOPATHY WITHOUT MACULAR EDEMA, BILATERAL	ICD-10 Diagnosis	E08.3293
DIABETES MELLITUS DUE TO UNDERLYING CONDITION WITH MILD NONPROLIFERATIVE DIABETIC RETINOPATHY WITHOUT MACULAR EDEMA, UNSPECIFIED EYE	ICD-10 Diagnosis	E08.3299
DIABETES MELLITUS DUE TO UNDERLYING CONDITION WITH MODERATE NONPROLIFERATIVE DIABETIC RETINOPATHY	ICD-10 Diagnosis	E08.33
DIABETES MELLITUS DUE TO UNDERLYING CONDITION WITH MODERATE NONPROLIFERATIVE DIABETIC RETINOPATHY WITH MACULAR EDEMA	ICD-10 Diagnosis	E08.331
DIABETES MELLITUS DUE TO UNDERLYING CONDITION WITH MODERATE NONPROLIFERATIVE DIABETIC RETINOPATHY WITH MACULAR EDEMA, RIGHT EYE	ICD-10 Diagnosis	E08.3311
DIABETES MELLITUS DUE TO UNDERLYING CONDITION WITH MODERATE NONPROLIFERATIVE DIABETIC RETINOPATHY WITH MACULAR EDEMA, LEFT EYE	ICD-10 Diagnosis	E08.3312
DIABETES MELLITUS DUE TO UNDERLYING CONDITION WITH MODERATE NONPROLIFERATIVE DIABETIC RETINOPATHY WITH MACULAR EDEMA, BILATERAL	ICD-10 Diagnosis	E08.3313
DIABETES MELLITUS DUE TO UNDERLYING CONDITION WITH MODERATE NONPROLIFERATIVE DIABETIC RETINOPATHY WITH MACULAR EDEMA, UNSPECIFIED EYE	ICD-10 Diagnosis	E08.3319
DIABETES MELLITUS DUE TO UNDERLYING CONDITION WITH MODERATE NONPROLIFERATIVE DIABETIC RETINOPATHY WITHOUT MACULAR EDEMA	ICD-10 Diagnosis	E08.339
DIABETES MELLITUS DUE TO UNDERLYING CONDITION WITH MODERATE NONPROLIFERATIVE DIABETIC RETINOPATHY WITHOUT MACULAR EDEMA, RIGHT EYE	ICD-10 Diagnosis	E08.3391
DIABETES MELLITUS DUE TO UNDERLYING CONDITION WITH MODERATE NONPROLIFERATIVE DIABETIC RETINOPATHY WITHOUT MACULAR EDEMA, LEFT EYE	ICD-10 Diagnosis	E08.3392
DIABETES MELLITUS DUE TO UNDERLYING CONDITION WITH MODERATE NONPROLIFERATIVE DIABETIC RETINOPATHY WITHOUT MACULAR EDEMA, BILATERAL	ICD-10 Diagnosis	E08.3393
DIABETES MELLITUS DUE TO UNDERLYING CONDITION WITH MODERATE NONPROLIFERATIVE DIABETIC RETINOPATHY WITHOUT MACULAR EDEMA, UNSPECIFIED EYE	ICD-10 Diagnosis	E08.3399
DIABETES MELLITUS DUE TO UNDERLYING CONDITION WITH SEVERE NONPROLIFERATIVE DIABETIC RETINOPATHY	ICD-10 Diagnosis	E08.34
DIABETES MELLITUS DUE TO UNDERLYING CONDITION WITH SEVERE NONPROLIFERATIVE DIABETIC RETINOPATHY WITH MACULAR EDEMA	ICD-10 Diagnosis	E08.341
DIABETES MELLITUS DUE TO UNDERLYING CONDITION WITH SEVERE NONPROLIFERATIVE DIABETIC RETINOPATHY WITH MACULAR EDEMA, RIGHT EYE	ICD-10 Diagnosis	E08.3411
DIABETES MELLITUS DUE TO UNDERLYING CONDITION WITH SEVERE NONPROLIFERATIVE DIABETIC RETINOPATHY WITH MACULAR EDEMA, LEFT EYE	ICD-10 Diagnosis	E08.3412
DIABETES MELLITUS DUE TO UNDERLYING CONDITION WITH SEVERE NONPROLIFERATIVE DIABETIC RETINOPATHY WITH MACULAR EDEMA, BILATERAL	ICD-10 Diagnosis	E08.3413
DIABETES MELLITUS DUE TO UNDERLYING CONDITION WITH SEVERE NONPROLIFERATIVE DIABETIC RETINOPATHY WITH MACULAR EDEMA, UNSPECIFIED EYE	ICD-10 Diagnosis	E08.3419
DIABETES MELLITUS DUE TO UNDERLYING CONDITION WITH SEVERE NONPROLIFERATIVE DIABETIC RETINOPATHY WITHOUT MACULAR EDEMA	ICD-10 Diagnosis	E08.349
DIABETES MELLITUS DUE TO UNDERLYING CONDITION WITH SEVERE NONPROLIFERATIVE DIABETIC RETINOPATHY WITHOUT MACULAR EDEMA, RIGHT EYE	ICD-10 Diagnosis	E08.3491
DIABETES MELLITUS DUE TO UNDERLYING CONDITION WITH SEVERE NONPROLIFERATIVE DIABETIC RETINOPATHY WITHOUT MACULAR EDEMA, LEFT EYE	ICD-10 Diagnosis	E08.3492
DIABETES MELLITUS DUE TO UNDERLYING CONDITION WITH SEVERE NONPROLIFERATIVE DIABETIC RETINOPATHY WITHOUT MACULAR EDEMA, BILATERAL	ICD-10 Diagnosis	E08.3493
DIABETES MELLITUS DUE TO UNDERLYING CONDITION WITH SEVERE NONPROLIFERATIVE DIABETIC RETINOPATHY WITHOUT MACULAR EDEMA, UNSPECIFIED EYE	ICD-10 Diagnosis	E08.3499
DIABETES MELLITUS DUE TO UNDERLYING CONDITION WITH PROLIFERATIVE DIABETIC RETINOPATHY	ICD-10 Diagnosis	E08.35
DIABETES MELLITUS DUE TO UNDERLYING CONDITION WITH PROLIFERATIVE DIABETIC RETINOPATHY WITH MACULAR EDEMA	ICD-10 Diagnosis	E08.351
DIABETES MELLITUS DUE TO UNDERLYING CONDITION WITH PROLIFERATIVE DIABETIC RETINOPATHY WITH MACULAR EDEMA, RIGHT EYE	ICD-10 Diagnosis	E08.3511
DIABETES MELLITUS DUE TO UNDERLYING CONDITION WITH PROLIFERATIVE DIABETIC RETINOPATHY WITH MACULAR EDEMA, LEFT EYE	ICD-10 Diagnosis	E08.3512
DIABETES MELLITUS DUE TO UNDERLYING CONDITION WITH PROLIFERATIVE DIABETIC RETINOPATHY WITH MACULAR EDEMA, BILATERAL	ICD-10 Diagnosis	E08.3513
DIABETES MELLITUS DUE TO UNDERLYING CONDITION WITH PROLIFERATIVE DIABETIC RETINOPATHY WITH MACULAR EDEMA, UNSPECIFIED EYE	ICD-10 Diagnosis	E08.3519
DIABETES MELLITUS DUE TO UNDERLYING CONDITION WITH PROLIFERATIVE DIABETIC RETINOPATHY WITH TRACTION RETINAL DETACHMENT INVOLVING THE MACULA	ICD-10 Diagnosis	E08.352
DIABETES MELLITUS DUE TO UNDERLYING CONDITION WITH PROLIFERATIVE DIABETIC RETINOPATHY WITH TRACTION RETINAL DETACHMENT INVOLVING THE MACULA, RIGHT EYE	ICD-10 Diagnosis	E08.3521
DIABETES MELLITUS DUE TO UNDERLYING CONDITION WITH PROLIFERATIVE DIABETIC RETINOPATHY WITH TRACTION RETINAL DETACHMENT INVOLVING THE MACULA, LEFT EYE	ICD-10 Diagnosis	E08.3522
DIABETES MELLITUS DUE TO UNDERLYING CONDITION WITH PROLIFERATIVE DIABETIC RETINOPATHY WITH TRACTION RETINAL DETACHMENT INVOLVING THE MACULA, BILATERAL	ICD-10 Diagnosis	E08.3523
DIABETES MELLITUS DUE TO UNDERLYING CONDITION WITH PROLIFERATIVE DIABETIC RETINOPATHY WITH TRACTION RETINAL DETACHMENT INVOLVING THE MACULA, UNSPECIFIED EYE	ICD-10 Diagnosis	E08.3529
DIABETES MELLITUS DUE TO UNDERLYING CONDITION WITH PROLIFERATIVE DIABETIC RETINOPATHY WITH TRACTION RETINAL DETACHMENT NOT INVOLVING THE MACULA	ICD-10 Diagnosis	E08.353
DIABETES MELLITUS DUE TO UNDERLYING CONDITION WITH PROLIFERATIVE DIABETIC RETINOPATHY WITH TRACTION RETINAL DETACHMENT NOT INVOLVING THE MACULA, RIGHT EYE	ICD-10 Diagnosis	E08.3531
DIABETES MELLITUS DUE TO UNDERLYING CONDITION WITH PROLIFERATIVE DIABETIC RETINOPATHY WITH TRACTION RETINAL DETACHMENT NOT INVOLVING THE MACULA, LEFT EYE	ICD-10 Diagnosis	E08.3532
DIABETES MELLITUS DUE TO UNDERLYING CONDITION WITH PROLIFERATIVE DIABETIC RETINOPATHY WITH TRACTION RETINAL DETACHMENT NOT INVOLVING THE MACULA, BILATERAL	ICD-10 Diagnosis	E08.3533
DIABETES MELLITUS DUE TO UNDERLYING CONDITION WITH PROLIFERATIVE DIABETIC RETINOPATHY WITH TRACTION RETINAL DETACHMENT NOT INVOLVING THE MACULA, UNSPECIFIED EYE	ICD-10 Diagnosis	E08.3539
DIABETES MELLITUS DUE TO UNDERLYING CONDITION WITH PROLIFERATIVE DIABETIC RETINOPATHY WITH COMBINED TRACTION RETINAL DETACHMENT AND RHEGMATOGENOUS RETINAL DETACHMENT	ICD-10 Diagnosis	E08.354
DIABETES MELLITUS DUE TO UNDERLYING CONDITION WITH PROLIFERATIVE DIABETIC RETINOPATHY WITH COMBINED TRACTION RETINAL DETACHMENT AND RHEGMATOGENOUS RETINAL DETACHMENT, RIGHT EYE	ICD-10 Diagnosis	E08.3541
DIABETES MELLITUS DUE TO UNDERLYING CONDITION WITH PROLIFERATIVE DIABETIC RETINOPATHY WITH COMBINED TRACTION RETINAL DETACHMENT AND RHEGMATOGENOUS RETINAL DETACHMENT, LEFT EYE	ICD-10 Diagnosis	E08.3542
DIABETES MELLITUS DUE TO UNDERLYING CONDITION WITH PROLIFERATIVE DIABETIC RETINOPATHY WITH COMBINED TRACTION RETINAL DETACHMENT AND RHEGMATOGENOUS RETINAL DETACHMENT, BILATERAL	ICD-10 Diagnosis	E08.3543
DIABETES MELLITUS DUE TO UNDERLYING CONDITION WITH PROLIFERATIVE DIABETIC RETINOPATHY WITH COMBINED TRACTION RETINAL DETACHMENT AND RHEGMATOGENOUS RETINAL DETACHMENT, UNSPECIFIED EYE	ICD-10 Diagnosis	E08.3549
DIABETES MELLITUS DUE TO UNDERLYING CONDITION WITH STABLE PROLIFERATIVE DIABETIC RETINOPATHY	ICD-10 Diagnosis	E08.355
DIABETES MELLITUS DUE TO UNDERLYING CONDITION WITH STABLE PROLIFERATIVE DIABETIC RETINOPATHY, RIGHT EYE	ICD-10 Diagnosis	E08.3551
DIABETES MELLITUS DUE TO UNDERLYING CONDITION WITH STABLE PROLIFERATIVE DIABETIC RETINOPATHY, LEFT EYE	ICD-10 Diagnosis	E08.3552
DIABETES MELLITUS DUE TO UNDERLYING CONDITION WITH STABLE PROLIFERATIVE DIABETIC RETINOPATHY, BILATERAL	ICD-10 Diagnosis	E08.3553
DIABETES MELLITUS DUE TO UNDERLYING CONDITION WITH STABLE PROLIFERATIVE DIABETIC RETINOPATHY, UNSPECIFIED EYE	ICD-10 Diagnosis	E08.3559
DIABETES MELLITUS DUE TO UNDERLYING CONDITION WITH PROLIFERATIVE DIABETIC RETINOPATHY WITHOUT MACULAR EDEMA	ICD-10 Diagnosis	E08.359
DIABETES MELLITUS DUE TO UNDERLYING CONDITION WITH PROLIFERATIVE DIABETIC RETINOPATHY WITHOUT MACULAR EDEMA, RIGHT EYE	ICD-10 Diagnosis	E08.3591
DIABETES MELLITUS DUE TO UNDERLYING CONDITION WITH PROLIFERATIVE DIABETIC RETINOPATHY WITHOUT MACULAR EDEMA, LEFT EYE	ICD-10 Diagnosis	E08.3592
DIABETES MELLITUS DUE TO UNDERLYING CONDITION WITH PROLIFERATIVE DIABETIC RETINOPATHY WITHOUT MACULAR EDEMA, BILATERAL	ICD-10 Diagnosis	E08.3593
DIABETES MELLITUS DUE TO UNDERLYING CONDITION WITH PROLIFERATIVE DIABETIC RETINOPATHY WITHOUT MACULAR EDEMA, UNSPECIFIED EYE	ICD-10 Diagnosis	E08.3599
DIABETES MELLITUS DUE TO UNDERLYING CONDITION WITH DIABETIC CATARACT	ICD-10 Diagnosis	E08.36
DIABETES MELLITUS DUE TO UNDERLYING CONDITION WITH DIABETIC MACULAR EDEMA, RESOLVED FOLLOWING TREATMENT	ICD-10 Diagnosis	E08.37
DIABETES MELLITUS DUE TO UNDERLYING CONDITION WITH DIABETIC MACULAR EDEMA, RESOLVED FOLLOWING TREATMENT, RIGHT EYE	ICD-10 Diagnosis	E08.37X1
DIABETES MELLITUS DUE TO UNDERLYING CONDITION WITH DIABETIC MACULAR EDEMA, RESOLVED FOLLOWING TREATMENT, LEFT EYE	ICD-10 Diagnosis	E08.37X2
DIABETES MELLITUS DUE TO UNDERLYING CONDITION WITH DIABETIC MACULAR EDEMA, RESOLVED FOLLOWING TREATMENT, BILATERAL	ICD-10 Diagnosis	E08.37X3
DIABETES MELLITUS DUE TO UNDERLYING CONDITION WITH DIABETIC MACULAR EDEMA, RESOLVED FOLLOWING TREATMENT, UNSPECIFIED EYE	ICD-10 Diagnosis	E08.37X9
DIABETES MELLITUS DUE TO UNDERLYING CONDITION WITH OTHER DIABETIC OPHTHALMIC COMPLICATION	ICD-10 Diagnosis	E08.39
DIABETES MELLITUS DUE TO UNDERLYING CONDITION WITH NEUROLOGICAL COMPLICATIONS	ICD-10 Diagnosis	E08.4
DIABETES MELLITUS DUE TO UNDERLYING CONDITION WITH DIABETIC NEUROPATHY, UNSPECIFIED	ICD-10 Diagnosis	E08.40
DIABETES MELLITUS DUE TO UNDERLYING CONDITION WITH DIABETIC MONONEUROPATHY	ICD-10 Diagnosis	E08.41
DIABETES MELLITUS DUE TO UNDERLYING CONDITION WITH DIABETIC POLYNEUROPATHY	ICD-10 Diagnosis	E08.42
DIABETES MELLITUS DUE TO UNDERLYING CONDITION WITH DIABETIC AUTONOMIC (POLY)NEUROPATHY	ICD-10 Diagnosis	E08.43
DIABETES MELLITUS DUE TO UNDERLYING CONDITION WITH DIABETIC AMYOTROPHY	ICD-10 Diagnosis	E08.44
DIABETES MELLITUS DUE TO UNDERLYING CONDITION WITH OTHER DIABETIC NEUROLOGICAL COMPLICATION	ICD-10 Diagnosis	E08.49
DIABETES MELLITUS DUE TO UNDERLYING CONDITION WITH CIRCULATORY COMPLICATIONS	ICD-10 Diagnosis	E08.5
DIABETES MELLITUS DUE TO UNDERLYING CONDITION WITH DIABETIC PERIPHERAL ANGIOPATHY WITHOUT GANGRENE	ICD-10 Diagnosis	E08.51
DIABETES MELLITUS DUE TO UNDERLYING CONDITION WITH DIABETIC PERIPHERAL ANGIOPATHY WITH GANGRENE	ICD-10 Diagnosis	E08.52
DIABETES MELLITUS DUE TO UNDERLYING CONDITION WITH OTHER CIRCULATORY COMPLICATIONS	ICD-10 Diagnosis	E08.59
DIABETES MELLITUS DUE TO UNDERLYING CONDITION WITH OTHER SPECIFIED COMPLICATIONS	ICD-10 Diagnosis	E08.6
DIABETES MELLITUS DUE TO UNDERLYING CONDITION WITH DIABETIC ARTHROPATHY	ICD-10 Diagnosis	E08.61
DIABETES MELLITUS DUE TO UNDERLYING CONDITION WITH DIABETIC NEUROPATHIC ARTHROPATHY	ICD-10 Diagnosis	E08.610
DIABETES MELLITUS DUE TO UNDERLYING CONDITION WITH OTHER DIABETIC ARTHROPATHY	ICD-10 Diagnosis	E08.618
DIABETES MELLITUS DUE TO UNDERLYING CONDITION WITH SKIN COMPLICATIONS	ICD-10 Diagnosis	E08.62
DIABETES MELLITUS DUE TO UNDERLYING CONDITION WITH DIABETIC DERMATITIS	ICD-10 Diagnosis	E08.620
DIABETES MELLITUS DUE TO UNDERLYING CONDITION WITH FOOT ULCER	ICD-10 Diagnosis	E08.621
DIABETES MELLITUS DUE TO UNDERLYING CONDITION WITH OTHER SKIN ULCER	ICD-10 Diagnosis	E08.622
DIABETES MELLITUS DUE TO UNDERLYING CONDITION WITH OTHER SKIN COMPLICATIONS	ICD-10 Diagnosis	E08.628
DIABETES MELLITUS DUE TO UNDERLYING CONDITION WITH ORAL COMPLICATIONS	ICD-10 Diagnosis	E08.63
DIABETES MELLITUS DUE TO UNDERLYING CONDITION WITH PERIODONTAL DISEASE	ICD-10 Diagnosis	E08.630
DIABETES MELLITUS DUE TO UNDERLYING CONDITION WITH OTHER ORAL COMPLICATIONS	ICD-10 Diagnosis	E08.638
DIABETES MELLITUS DUE TO UNDERLYING CONDITION WITH HYPOGLYCEMIA	ICD-10 Diagnosis	E08.64
DIABETES MELLITUS DUE TO UNDERLYING CONDITION WITH HYPOGLYCEMIA WITH COMA	ICD-10 Diagnosis	E08.641
DIABETES MELLITUS DUE TO UNDERLYING CONDITION WITH HYPOGLYCEMIA WITHOUT COMA	ICD-10 Diagnosis	E08.649
DIABETES MELLITUS DUE TO UNDERLYING CONDITION WITH HYPERGLYCEMIA	ICD-10 Diagnosis	E08.65
DIABETES MELLITUS DUE TO UNDERLYING CONDITION WITH OTHER SPECIFIED COMPLICATION	ICD-10 Diagnosis	E08.69
DIABETES MELLITUS DUE TO UNDERLYING CONDITION WITH UNSPECIFIED COMPLICATIONS	ICD-10 Diagnosis	E08.8
DIABETES MELLITUS DUE TO UNDERLYING CONDITION WITHOUT COMPLICATIONS	ICD-10 Diagnosis	E08.9
DRUG OR CHEMICAL INDUCED DIABETES MELLITUS	ICD-10 Diagnosis	E09
DRUG OR CHEMICAL INDUCED DIABETES MELLITUS WITH HYPEROSMOLARITY	ICD-10 Diagnosis	E09.0
DRUG OR CHEMICAL INDUCED DIABETES MELLITUS WITH HYPEROSMOLARITY WITHOUT NONKETOTIC HYPERGLYCEMIC-HYPEROSMOLAR COMA (NKHHC)	ICD-10 Diagnosis	E09.00
DRUG OR CHEMICAL INDUCED DIABETES MELLITUS WITH HYPEROSMOLARITY WITH COMA	ICD-10 Diagnosis	E09.01
DRUG OR CHEMICAL INDUCED DIABETES MELLITUS WITH KETOACIDOSIS	ICD-10 Diagnosis	E09.1
DRUG OR CHEMICAL INDUCED DIABETES MELLITUS WITH KETOACIDOSIS WITHOUT COMA	ICD-10 Diagnosis	E09.10
DRUG OR CHEMICAL INDUCED DIABETES MELLITUS WITH KETOACIDOSIS WITH COMA	ICD-10 Diagnosis	E09.11
DRUG OR CHEMICAL INDUCED DIABETES MELLITUS WITH KIDNEY COMPLICATIONS	ICD-10 Diagnosis	E09.2
DRUG OR CHEMICAL INDUCED DIABETES MELLITUS WITH DIABETIC NEPHROPATHY	ICD-10 Diagnosis	E09.21
DRUG OR CHEMICAL INDUCED DIABETES MELLITUS WITH DIABETIC CHRONIC KIDNEY DISEASE	ICD-10 Diagnosis	E09.22
DRUG OR CHEMICAL INDUCED DIABETES MELLITUS WITH OTHER DIABETIC KIDNEY COMPLICATION	ICD-10 Diagnosis	E09.29
DRUG OR CHEMICAL INDUCED DIABETES MELLITUS WITH OPHTHALMIC COMPLICATIONS	ICD-10 Diagnosis	E09.3
DRUG OR CHEMICAL INDUCED DIABETES MELLITUS WITH UNSPECIFIED DIABETIC RETINOPATHY	ICD-10 Diagnosis	E09.31
DRUG OR CHEMICAL INDUCED DIABETES MELLITUS WITH UNSPECIFIED DIABETIC RETINOPATHY WITH MACULAR EDEMA	ICD-10 Diagnosis	E09.311
DRUG OR CHEMICAL INDUCED DIABETES MELLITUS WITH UNSPECIFIED DIABETIC RETINOPATHY WITHOUT MACULAR EDEMA	ICD-10 Diagnosis	E09.319
DRUG OR CHEMICAL INDUCED DIABETES MELLITUS WITH MILD NONPROLIFERATIVE DIABETIC RETINOPATHY	ICD-10 Diagnosis	E09.32
DRUG OR CHEMICAL INDUCED DIABETES MELLITUS WITH MILD NONPROLIFERATIVE DIABETIC RETINOPATHY WITH MACULAR EDEMA	ICD-10 Diagnosis	E09.321
DRUG OR CHEMICAL INDUCED DIABETES MELLITUS WITH MILD NONPROLIFERATIVE DIABETIC RETINOPATHY WITH MACULAR EDEMA, RIGHT EYE	ICD-10 Diagnosis	E09.3211
DRUG OR CHEMICAL INDUCED DIABETES MELLITUS WITH MILD NONPROLIFERATIVE DIABETIC RETINOPATHY WITH MACULAR EDEMA, LEFT EYE	ICD-10 Diagnosis	E09.3212
DRUG OR CHEMICAL INDUCED DIABETES MELLITUS WITH MILD NONPROLIFERATIVE DIABETIC RETINOPATHY WITH MACULAR EDEMA, BILATERAL	ICD-10 Diagnosis	E09.3213
DRUG OR CHEMICAL INDUCED DIABETES MELLITUS WITH MILD NONPROLIFERATIVE DIABETIC RETINOPATHY WITH MACULAR EDEMA, UNSPECIFIED EYE	ICD-10 Diagnosis	E09.3219
DRUG OR CHEMICAL INDUCED DIABETES MELLITUS WITH MILD NONPROLIFERATIVE DIABETIC RETINOPATHY WITHOUT MACULAR EDEMA	ICD-10 Diagnosis	E09.329
DRUG OR CHEMICAL INDUCED DIABETES MELLITUS WITH MILD NONPROLIFERATIVE DIABETIC RETINOPATHY WITHOUT MACULAR EDEMA, RIGHT EYE	ICD-10 Diagnosis	E09.3291
DRUG OR CHEMICAL INDUCED DIABETES MELLITUS WITH MILD NONPROLIFERATIVE DIABETIC RETINOPATHY WITHOUT MACULAR EDEMA, LEFT EYE	ICD-10 Diagnosis	E09.3292
DRUG OR CHEMICAL INDUCED DIABETES MELLITUS WITH MILD NONPROLIFERATIVE DIABETIC RETINOPATHY WITHOUT MACULAR EDEMA, BILATERAL	ICD-10 Diagnosis	E09.3293
DRUG OR CHEMICAL INDUCED DIABETES MELLITUS WITH MILD NONPROLIFERATIVE DIABETIC RETINOPATHY WITHOUT MACULAR EDEMA, UNSPECIFIED EYE	ICD-10 Diagnosis	E09.3299
DRUG OR CHEMICAL INDUCED DIABETES MELLITUS WITH MODERATE NONPROLIFERATIVE DIABETIC RETINOPATHY	ICD-10 Diagnosis	E09.33
DRUG OR CHEMICAL INDUCED DIABETES MELLITUS WITH MODERATE NONPROLIFERATIVE DIABETIC RETINOPATHY WITH MACULAR EDEMA	ICD-10 Diagnosis	E09.331
DRUG OR CHEMICAL INDUCED DIABETES MELLITUS WITH MODERATE NONPROLIFERATIVE DIABETIC RETINOPATHY WITH MACULAR EDEMA, RIGHT EYE	ICD-10 Diagnosis	E09.3311
DRUG OR CHEMICAL INDUCED DIABETES MELLITUS WITH MODERATE NONPROLIFERATIVE DIABETIC RETINOPATHY WITH MACULAR EDEMA, LEFT EYE	ICD-10 Diagnosis	E09.3312
DRUG OR CHEMICAL INDUCED DIABETES MELLITUS WITH MODERATE NONPROLIFERATIVE DIABETIC RETINOPATHY WITH MACULAR EDEMA, BILATERAL	ICD-10 Diagnosis	E09.3313
DRUG OR CHEMICAL INDUCED DIABETES MELLITUS WITH MODERATE NONPROLIFERATIVE DIABETIC RETINOPATHY WITH MACULAR EDEMA, UNSPECIFIED EYE	ICD-10 Diagnosis	E09.3319
DRUG OR CHEMICAL INDUCED DIABETES MELLITUS WITH MODERATE NONPROLIFERATIVE DIABETIC RETINOPATHY WITHOUT MACULAR EDEMA	ICD-10 Diagnosis	E09.339
DRUG OR CHEMICAL INDUCED DIABETES MELLITUS WITH MODERATE NONPROLIFERATIVE DIABETIC RETINOPATHY WITHOUT MACULAR EDEMA, RIGHT EYE	ICD-10 Diagnosis	E09.3391
DRUG OR CHEMICAL INDUCED DIABETES MELLITUS WITH MODERATE NONPROLIFERATIVE DIABETIC RETINOPATHY WITHOUT MACULAR EDEMA, LEFT EYE	ICD-10 Diagnosis	E09.3392
DRUG OR CHEMICAL INDUCED DIABETES MELLITUS WITH MODERATE NONPROLIFERATIVE DIABETIC RETINOPATHY WITHOUT MACULAR EDEMA, BILATERAL	ICD-10 Diagnosis	E09.3393
DRUG OR CHEMICAL INDUCED DIABETES MELLITUS WITH MODERATE NONPROLIFERATIVE DIABETIC RETINOPATHY WITHOUT MACULAR EDEMA, UNSPECIFIED EYE	ICD-10 Diagnosis	E09.3399
DRUG OR CHEMICAL INDUCED DIABETES MELLITUS WITH SEVERE NONPROLIFERATIVE DIABETIC RETINOPATHY	ICD-10 Diagnosis	E09.34
DRUG OR CHEMICAL INDUCED DIABETES MELLITUS WITH SEVERE NONPROLIFERATIVE DIABETIC RETINOPATHY WITH MACULAR EDEMA	ICD-10 Diagnosis	E09.341
DRUG OR CHEMICAL INDUCED DIABETES MELLITUS WITH SEVERE NONPROLIFERATIVE DIABETIC RETINOPATHY WITH MACULAR EDEMA, RIGHT EYE	ICD-10 Diagnosis	E09.3411
DRUG OR CHEMICAL INDUCED DIABETES MELLITUS WITH SEVERE NONPROLIFERATIVE DIABETIC RETINOPATHY WITH MACULAR EDEMA, LEFT EYE	ICD-10 Diagnosis	E09.3412
DRUG OR CHEMICAL INDUCED DIABETES MELLITUS WITH SEVERE NONPROLIFERATIVE DIABETIC RETINOPATHY WITH MACULAR EDEMA, BILATERAL	ICD-10 Diagnosis	E09.3413
DRUG OR CHEMICAL INDUCED DIABETES MELLITUS WITH SEVERE NONPROLIFERATIVE DIABETIC RETINOPATHY WITH MACULAR EDEMA, UNSPECIFIED EYE	ICD-10 Diagnosis	E09.3419
DRUG OR CHEMICAL INDUCED DIABETES MELLITUS WITH SEVERE NONPROLIFERATIVE DIABETIC RETINOPATHY WITHOUT MACULAR EDEMA	ICD-10 Diagnosis	E09.349
DRUG OR CHEMICAL INDUCED DIABETES MELLITUS WITH SEVERE NONPROLIFERATIVE DIABETIC RETINOPATHY WITHOUT MACULAR EDEMA, RIGHT EYE	ICD-10 Diagnosis	E09.3491
DRUG OR CHEMICAL INDUCED DIABETES MELLITUS WITH SEVERE NONPROLIFERATIVE DIABETIC RETINOPATHY WITHOUT MACULAR EDEMA, LEFT EYE	ICD-10 Diagnosis	E09.3492
DRUG OR CHEMICAL INDUCED DIABETES MELLITUS WITH SEVERE NONPROLIFERATIVE DIABETIC RETINOPATHY WITHOUT MACULAR EDEMA, BILATERAL	ICD-10 Diagnosis	E09.3493
DRUG OR CHEMICAL INDUCED DIABETES MELLITUS WITH SEVERE NONPROLIFERATIVE DIABETIC RETINOPATHY WITHOUT MACULAR EDEMA, UNSPECIFIED EYE	ICD-10 Diagnosis	E09.3499
DRUG OR CHEMICAL INDUCED DIABETES MELLITUS WITH PROLIFERATIVE DIABETIC RETINOPATHY	ICD-10 Diagnosis	E09.35
DRUG OR CHEMICAL INDUCED DIABETES MELLITUS WITH PROLIFERATIVE DIABETIC RETINOPATHY WITH MACULAR EDEMA	ICD-10 Diagnosis	E09.351
DRUG OR CHEMICAL INDUCED DIABETES MELLITUS WITH PROLIFERATIVE DIABETIC RETINOPATHY WITH MACULAR EDEMA, RIGHT EYE	ICD-10 Diagnosis	E09.3511
DRUG OR CHEMICAL INDUCED DIABETES MELLITUS WITH PROLIFERATIVE DIABETIC RETINOPATHY WITH MACULAR EDEMA, LEFT EYE	ICD-10 Diagnosis	E09.3512
DRUG OR CHEMICAL INDUCED DIABETES MELLITUS WITH PROLIFERATIVE DIABETIC RETINOPATHY WITH MACULAR EDEMA, BILATERAL	ICD-10 Diagnosis	E09.3513
DRUG OR CHEMICAL INDUCED DIABETES MELLITUS WITH PROLIFERATIVE DIABETIC RETINOPATHY WITH MACULAR EDEMA, UNSPECIFIED EYE	ICD-10 Diagnosis	E09.3519
DRUG OR CHEMICAL INDUCED DIABETES MELLITUS WITH PROLIFERATIVE DIABETIC RETINOPATHY WITH TRACTION RETINAL DETACHMENT INVOLVING THE MACULA	ICD-10 Diagnosis	E09.352
DRUG OR CHEMICAL INDUCED DIABETES MELLITUS WITH PROLIFERATIVE DIABETIC RETINOPATHY WITH TRACTION RETINAL DETACHMENT INVOLVING THE MACULA, RIGHT EYE	ICD-10 Diagnosis	E09.3521
DRUG OR CHEMICAL INDUCED DIABETES MELLITUS WITH PROLIFERATIVE DIABETIC RETINOPATHY WITH TRACTION RETINAL DETACHMENT INVOLVING THE MACULA, LEFT EYE	ICD-10 Diagnosis	E09.3522
DRUG OR CHEMICAL INDUCED DIABETES MELLITUS WITH PROLIFERATIVE DIABETIC RETINOPATHY WITH TRACTION RETINAL DETACHMENT INVOLVING THE MACULA, BILATERAL	ICD-10 Diagnosis	E09.3523
DRUG OR CHEMICAL INDUCED DIABETES MELLITUS WITH PROLIFERATIVE DIABETIC RETINOPATHY WITH TRACTION RETINAL DETACHMENT INVOLVING THE MACULA, UNSPECIFIED EYE	ICD-10 Diagnosis	E09.3529
DRUG OR CHEMICAL INDUCED DIABETES MELLITUS WITH PROLIFERATIVE DIABETIC RETINOPATHY WITH TRACTION RETINAL DETACHMENT NOT INVOLVING THE MACULA	ICD-10 Diagnosis	E09.353
DRUG OR CHEMICAL INDUCED DIABETES MELLITUS WITH PROLIFERATIVE DIABETIC RETINOPATHY WITH TRACTION RETINAL DETACHMENT NOT INVOLVING THE MACULA, RIGHT EYE	ICD-10 Diagnosis	E09.3531
DRUG OR CHEMICAL INDUCED DIABETES MELLITUS WITH PROLIFERATIVE DIABETIC RETINOPATHY WITH TRACTION RETINAL DETACHMENT NOT INVOLVING THE MACULA, LEFT EYE	ICD-10 Diagnosis	E09.3532
DRUG OR CHEMICAL INDUCED DIABETES MELLITUS WITH PROLIFERATIVE DIABETIC RETINOPATHY WITH TRACTION RETINAL DETACHMENT NOT INVOLVING THE MACULA, BILATERAL	ICD-10 Diagnosis	E09.3533
DRUG OR CHEMICAL INDUCED DIABETES MELLITUS WITH PROLIFERATIVE DIABETIC RETINOPATHY WITH TRACTION RETINAL DETACHMENT NOT INVOLVING THE MACULA, UNSPECIFIED EYE	ICD-10 Diagnosis	E09.3539
DRUG OR CHEMICAL INDUCED DIABETES MELLITUS WITH PROLIFERATIVE DIABETIC RETINOPATHY WITH COMBINED TRACTION RETINAL DETACHMENT AND RHEGMATOGENOUS RETINAL DETACHMENT	ICD-10 Diagnosis	E09.354
DRUG OR CHEMICAL INDUCED DIABETES MELLITUS WITH PROLIFERATIVE DIABETIC RETINOPATHY WITH COMBINED TRACTION RETINAL DETACHMENT AND RHEGMATOGENOUS RETINAL DETACHMENT, RIGHT EYE	ICD-10 Diagnosis	E09.3541
DRUG OR CHEMICAL INDUCED DIABETES MELLITUS WITH PROLIFERATIVE DIABETIC RETINOPATHY WITH COMBINED TRACTION RETINAL DETACHMENT AND RHEGMATOGENOUS RETINAL DETACHMENT, LEFT EYE	ICD-10 Diagnosis	E09.3542
DRUG OR CHEMICAL INDUCED DIABETES MELLITUS WITH PROLIFERATIVE DIABETIC RETINOPATHY WITH COMBINED TRACTION RETINAL DETACHMENT AND RHEGMATOGENOUS RETINAL DETACHMENT, BILATERAL	ICD-10 Diagnosis	E09.3543
DRUG OR CHEMICAL INDUCED DIABETES MELLITUS WITH PROLIFERATIVE DIABETIC RETINOPATHY WITH COMBINED TRACTION RETINAL DETACHMENT AND RHEGMATOGENOUS RETINAL DETACHMENT, UNSPECIFIED EYE	ICD-10 Diagnosis	E09.3549
DRUG OR CHEMICAL INDUCED DIABETES MELLITUS WITH STABLE PROLIFERATIVE DIABETIC RETINOPATHY	ICD-10 Diagnosis	E09.355
DRUG OR CHEMICAL INDUCED DIABETES MELLITUS WITH STABLE PROLIFERATIVE DIABETIC RETINOPATHY, RIGHT EYE	ICD-10 Diagnosis	E09.3551
DRUG OR CHEMICAL INDUCED DIABETES MELLITUS WITH STABLE PROLIFERATIVE DIABETIC RETINOPATHY, LEFT EYE	ICD-10 Diagnosis	E09.3552
DRUG OR CHEMICAL INDUCED DIABETES MELLITUS WITH STABLE PROLIFERATIVE DIABETIC RETINOPATHY, BILATERAL	ICD-10 Diagnosis	E09.3553
DRUG OR CHEMICAL INDUCED DIABETES MELLITUS WITH STABLE PROLIFERATIVE DIABETIC RETINOPATHY, UNSPECIFIED EYE	ICD-10 Diagnosis	E09.3559
DRUG OR CHEMICAL INDUCED DIABETES MELLITUS WITH PROLIFERATIVE DIABETIC RETINOPATHY WITHOUT MACULAR EDEMA	ICD-10 Diagnosis	E09.359
DRUG OR CHEMICAL INDUCED DIABETES MELLITUS WITH PROLIFERATIVE DIABETIC RETINOPATHY WITHOUT MACULAR EDEMA, RIGHT EYE	ICD-10 Diagnosis	E09.3591
DRUG OR CHEMICAL INDUCED DIABETES MELLITUS WITH PROLIFERATIVE DIABETIC RETINOPATHY WITHOUT MACULAR EDEMA, LEFT EYE	ICD-10 Diagnosis	E09.3592
DRUG OR CHEMICAL INDUCED DIABETES MELLITUS WITH PROLIFERATIVE DIABETIC RETINOPATHY WITHOUT MACULAR EDEMA, BILATERAL	ICD-10 Diagnosis	E09.3593
DRUG OR CHEMICAL INDUCED DIABETES MELLITUS WITH PROLIFERATIVE DIABETIC RETINOPATHY WITHOUT MACULAR EDEMA, UNSPECIFIED EYE	ICD-10 Diagnosis	E09.3599
DRUG OR CHEMICAL INDUCED DIABETES MELLITUS WITH DIABETIC CATARACT	ICD-10 Diagnosis	E09.36
DRUG OR CHEMICAL INDUCED DIABETES MELLITUS WITH DIABETIC MACULAR EDEMA, RESOLVED FOLLOWING TREATMENT	ICD-10 Diagnosis	E09.37
DRUG OR CHEMICAL INDUCED DIABETES MELLITUS WITH DIABETIC MACULAR EDEMA, RESOLVED FOLLOWING TREATMENT, RIGHT EYE	ICD-10 Diagnosis	E09.37X1
DRUG OR CHEMICAL INDUCED DIABETES MELLITUS WITH DIABETIC MACULAR EDEMA, RESOLVED FOLLOWING TREATMENT, LEFT EYE	ICD-10 Diagnosis	E09.37X2
DRUG OR CHEMICAL INDUCED DIABETES MELLITUS WITH DIABETIC MACULAR EDEMA, RESOLVED FOLLOWING TREATMENT, BILATERAL	ICD-10 Diagnosis	E09.37X3
DRUG OR CHEMICAL INDUCED DIABETES MELLITUS WITH DIABETIC MACULAR EDEMA, RESOLVED FOLLOWING TREATMENT, UNSPECIFIED EYE	ICD-10 Diagnosis	E09.37X9
DRUG OR CHEMICAL INDUCED DIABETES MELLITUS WITH OTHER DIABETIC OPHTHALMIC COMPLICATION	ICD-10 Diagnosis	E09.39
DRUG OR CHEMICAL INDUCED DIABETES MELLITUS WITH NEUROLOGICAL COMPLICATIONS	ICD-10 Diagnosis	E09.4
DRUG OR CHEMICAL INDUCED DIABETES MELLITUS WITH NEUROLOGICAL COMPLICATIONS WITH DIABETIC NEUROPATHY, UNSPECIFIED	ICD-10 Diagnosis	E09.40
DRUG OR CHEMICAL INDUCED DIABETES MELLITUS WITH NEUROLOGICAL COMPLICATIONS WITH DIABETIC MONONEUROPATHY	ICD-10 Diagnosis	E09.41
DRUG OR CHEMICAL INDUCED DIABETES MELLITUS WITH NEUROLOGICAL COMPLICATIONS WITH DIABETIC POLYNEUROPATHY	ICD-10 Diagnosis	E09.42
DRUG OR CHEMICAL INDUCED DIABETES MELLITUS WITH NEUROLOGICAL COMPLICATIONS WITH DIABETIC AUTONOMIC (POLY)NEUROPATHY	ICD-10 Diagnosis	E09.43
DRUG OR CHEMICAL INDUCED DIABETES MELLITUS WITH NEUROLOGICAL COMPLICATIONS WITH DIABETIC AMYOTROPHY	ICD-10 Diagnosis	E09.44
DRUG OR CHEMICAL INDUCED DIABETES MELLITUS WITH NEUROLOGICAL COMPLICATIONS WITH OTHER DIABETIC NEUROLOGICAL COMPLICATION	ICD-10 Diagnosis	E09.49
DRUG OR CHEMICAL INDUCED DIABETES MELLITUS WITH CIRCULATORY COMPLICATIONS	ICD-10 Diagnosis	E09.5
DRUG OR CHEMICAL INDUCED DIABETES MELLITUS WITH DIABETIC PERIPHERAL ANGIOPATHY WITHOUT GANGRENE	ICD-10 Diagnosis	E09.51
DRUG OR CHEMICAL INDUCED DIABETES MELLITUS WITH DIABETIC PERIPHERAL ANGIOPATHY WITH GANGRENE	ICD-10 Diagnosis	E09.52
DRUG OR CHEMICAL INDUCED DIABETES MELLITUS WITH OTHER CIRCULATORY COMPLICATIONS	ICD-10 Diagnosis	E09.59
DRUG OR CHEMICAL INDUCED DIABETES MELLITUS WITH OTHER SPECIFIED COMPLICATIONS	ICD-10 Diagnosis	E09.6
DRUG OR CHEMICAL INDUCED DIABETES MELLITUS WITH DIABETIC ARTHROPATHY	ICD-10 Diagnosis	E09.61
DRUG OR CHEMICAL INDUCED DIABETES MELLITUS WITH DIABETIC NEUROPATHIC ARTHROPATHY	ICD-10 Diagnosis	E09.610
DRUG OR CHEMICAL INDUCED DIABETES MELLITUS WITH OTHER DIABETIC ARTHROPATHY	ICD-10 Diagnosis	E09.618
DRUG OR CHEMICAL INDUCED DIABETES MELLITUS WITH SKIN COMPLICATIONS	ICD-10 Diagnosis	E09.62
DRUG OR CHEMICAL INDUCED DIABETES MELLITUS WITH DIABETIC DERMATITIS	ICD-10 Diagnosis	E09.620
DRUG OR CHEMICAL INDUCED DIABETES MELLITUS WITH FOOT ULCER	ICD-10 Diagnosis	E09.621
DRUG OR CHEMICAL INDUCED DIABETES MELLITUS WITH OTHER SKIN ULCER	ICD-10 Diagnosis	E09.622
DRUG OR CHEMICAL INDUCED DIABETES MELLITUS WITH OTHER SKIN COMPLICATIONS	ICD-10 Diagnosis	E09.628
DRUG OR CHEMICAL INDUCED DIABETES MELLITUS WITH ORAL COMPLICATIONS	ICD-10 Diagnosis	E09.63
DRUG OR CHEMICAL INDUCED DIABETES MELLITUS WITH PERIODONTAL DISEASE	ICD-10 Diagnosis	E09.630
DRUG OR CHEMICAL INDUCED DIABETES MELLITUS WITH OTHER ORAL COMPLICATIONS	ICD-10 Diagnosis	E09.638
DRUG OR CHEMICAL INDUCED DIABETES MELLITUS WITH HYPOGLYCEMIA	ICD-10 Diagnosis	E09.64
DRUG OR CHEMICAL INDUCED DIABETES MELLITUS WITH HYPOGLYCEMIA WITH COMA	ICD-10 Diagnosis	E09.641
DRUG OR CHEMICAL INDUCED DIABETES MELLITUS WITH HYPOGLYCEMIA WITHOUT COMA	ICD-10 Diagnosis	E09.649
DRUG OR CHEMICAL INDUCED DIABETES MELLITUS WITH HYPERGLYCEMIA	ICD-10 Diagnosis	E09.65
DRUG OR CHEMICAL INDUCED DIABETES MELLITUS WITH OTHER SPECIFIED COMPLICATION	ICD-10 Diagnosis	E09.69
DRUG OR CHEMICAL INDUCED DIABETES MELLITUS WITH UNSPECIFIED COMPLICATIONS	ICD-10 Diagnosis	E09.8
DRUG OR CHEMICAL INDUCED DIABETES MELLITUS WITHOUT COMPLICATIONS	ICD-10 Diagnosis	E09.9
TYPE 1 DIABETES MELLITUS	ICD-10 Diagnosis	E10
TYPE 1 DIABETES MELLITUS WITH KETOACIDOSIS	ICD-10 Diagnosis	E10.1
TYPE 1 DIABETES MELLITUS WITH KETOACIDOSIS WITHOUT COMA	ICD-10 Diagnosis	E10.10
TYPE 1 DIABETES MELLITUS WITH KETOACIDOSIS WITH COMA	ICD-10 Diagnosis	E10.11
TYPE 1 DIABETES MELLITUS WITH KIDNEY COMPLICATIONS	ICD-10 Diagnosis	E10.2
TYPE 1 DIABETES MELLITUS WITH DIABETIC NEPHROPATHY	ICD-10 Diagnosis	E10.21
TYPE 1 DIABETES MELLITUS WITH DIABETIC CHRONIC KIDNEY DISEASE	ICD-10 Diagnosis	E10.22
TYPE 1 DIABETES MELLITUS WITH OTHER DIABETIC KIDNEY COMPLICATION	ICD-10 Diagnosis	E10.29
TYPE 1 DIABETES MELLITUS WITH OPHTHALMIC COMPLICATIONS	ICD-10 Diagnosis	E10.3
TYPE 1 DIABETES MELLITUS WITH UNSPECIFIED DIABETIC RETINOPATHY	ICD-10 Diagnosis	E10.31
TYPE 1 DIABETES MELLITUS WITH UNSPECIFIED DIABETIC RETINOPATHY WITH MACULAR EDEMA	ICD-10 Diagnosis	E10.311
TYPE 1 DIABETES MELLITUS WITH UNSPECIFIED DIABETIC RETINOPATHY WITHOUT MACULAR EDEMA	ICD-10 Diagnosis	E10.319
TYPE 1 DIABETES MELLITUS WITH MILD NONPROLIFERATIVE DIABETIC RETINOPATHY	ICD-10 Diagnosis	E10.32
TYPE 1 DIABETES MELLITUS WITH MILD NONPROLIFERATIVE DIABETIC RETINOPATHY WITH MACULAR EDEMA	ICD-10 Diagnosis	E10.321
TYPE 1 DIABETES MELLITUS WITH MILD NONPROLIFERATIVE DIABETIC RETINOPATHY WITH MACULAR EDEMA, RIGHT EYE	ICD-10 Diagnosis	E10.3211
TYPE 1 DIABETES MELLITUS WITH MILD NONPROLIFERATIVE DIABETIC RETINOPATHY WITH MACULAR EDEMA, LEFT EYE	ICD-10 Diagnosis	E10.3212
TYPE 1 DIABETES MELLITUS WITH MILD NONPROLIFERATIVE DIABETIC RETINOPATHY WITH MACULAR EDEMA, BILATERAL	ICD-10 Diagnosis	E10.3213
TYPE 1 DIABETES MELLITUS WITH MILD NONPROLIFERATIVE DIABETIC RETINOPATHY WITH MACULAR EDEMA, UNSPECIFIED EYE	ICD-10 Diagnosis	E10.3219
TYPE 1 DIABETES MELLITUS WITH MILD NONPROLIFERATIVE DIABETIC RETINOPATHY WITHOUT MACULAR EDEMA	ICD-10 Diagnosis	E10.329
TYPE 1 DIABETES MELLITUS WITH MILD NONPROLIFERATIVE DIABETIC RETINOPATHY WITHOUT MACULAR EDEMA, RIGHT EYE	ICD-10 Diagnosis	E10.3291
TYPE 1 DIABETES MELLITUS WITH MILD NONPROLIFERATIVE DIABETIC RETINOPATHY WITHOUT MACULAR EDEMA, LEFT EYE	ICD-10 Diagnosis	E10.3292
TYPE 1 DIABETES MELLITUS WITH MILD NONPROLIFERATIVE DIABETIC RETINOPATHY WITHOUT MACULAR EDEMA, BILATERAL	ICD-10 Diagnosis	E10.3293
TYPE 1 DIABETES MELLITUS WITH MILD NONPROLIFERATIVE DIABETIC RETINOPATHY WITHOUT MACULAR EDEMA, UNSPECIFIED EYE	ICD-10 Diagnosis	E10.3299
TYPE 1 DIABETES MELLITUS WITH MODERATE NONPROLIFERATIVE DIABETIC RETINOPATHY	ICD-10 Diagnosis	E10.33
TYPE 1 DIABETES MELLITUS WITH MODERATE NONPROLIFERATIVE DIABETIC RETINOPATHY WITH MACULAR EDEMA	ICD-10 Diagnosis	E10.331
TYPE 1 DIABETES MELLITUS WITH MODERATE NONPROLIFERATIVE DIABETIC RETINOPATHY WITH MACULAR EDEMA, RIGHT EYE	ICD-10 Diagnosis	E10.3311
TYPE 1 DIABETES MELLITUS WITH MODERATE NONPROLIFERATIVE DIABETIC RETINOPATHY WITH MACULAR EDEMA, LEFT EYE	ICD-10 Diagnosis	E10.3312
TYPE 1 DIABETES MELLITUS WITH MODERATE NONPROLIFERATIVE DIABETIC RETINOPATHY WITH MACULAR EDEMA, BILATERAL	ICD-10 Diagnosis	E10.3313
TYPE 1 DIABETES MELLITUS WITH MODERATE NONPROLIFERATIVE DIABETIC RETINOPATHY WITH MACULAR EDEMA, UNSPECIFIED EYE	ICD-10 Diagnosis	E10.3319
TYPE 1 DIABETES MELLITUS WITH MODERATE NONPROLIFERATIVE DIABETIC RETINOPATHY WITHOUT MACULAR EDEMA	ICD-10 Diagnosis	E10.339
TYPE 1 DIABETES MELLITUS WITH MODERATE NONPROLIFERATIVE DIABETIC RETINOPATHY WITHOUT MACULAR EDEMA, RIGHT EYE	ICD-10 Diagnosis	E10.3391
TYPE 1 DIABETES MELLITUS WITH MODERATE NONPROLIFERATIVE DIABETIC RETINOPATHY WITHOUT MACULAR EDEMA, LEFT EYE	ICD-10 Diagnosis	E10.3392
TYPE 1 DIABETES MELLITUS WITH MODERATE NONPROLIFERATIVE DIABETIC RETINOPATHY WITHOUT MACULAR EDEMA, BILATERAL	ICD-10 Diagnosis	E10.3393
TYPE 1 DIABETES MELLITUS WITH MODERATE NONPROLIFERATIVE DIABETIC RETINOPATHY WITHOUT MACULAR EDEMA, UNSPECIFIED EYE	ICD-10 Diagnosis	E10.3399
TYPE 1 DIABETES MELLITUS WITH SEVERE NONPROLIFERATIVE DIABETIC RETINOPATHY	ICD-10 Diagnosis	E10.34
TYPE 1 DIABETES MELLITUS WITH SEVERE NONPROLIFERATIVE DIABETIC RETINOPATHY WITH MACULAR EDEMA	ICD-10 Diagnosis	E10.341
TYPE 1 DIABETES MELLITUS WITH SEVERE NONPROLIFERATIVE DIABETIC RETINOPATHY WITH MACULAR EDEMA, RIGHT EYE	ICD-10 Diagnosis	E10.3411
TYPE 1 DIABETES MELLITUS WITH SEVERE NONPROLIFERATIVE DIABETIC RETINOPATHY WITH MACULAR EDEMA, LEFT EYE	ICD-10 Diagnosis	E10.3412
TYPE 1 DIABETES MELLITUS WITH SEVERE NONPROLIFERATIVE DIABETIC RETINOPATHY WITH MACULAR EDEMA, BILATERAL	ICD-10 Diagnosis	E10.3413
TYPE 1 DIABETES MELLITUS WITH SEVERE NONPROLIFERATIVE DIABETIC RETINOPATHY WITH MACULAR EDEMA, UNSPECIFIED EYE	ICD-10 Diagnosis	E10.3419
TYPE 1 DIABETES MELLITUS WITH SEVERE NONPROLIFERATIVE DIABETIC RETINOPATHY WITHOUT MACULAR EDEMA	ICD-10 Diagnosis	E10.349
TYPE 1 DIABETES MELLITUS WITH SEVERE NONPROLIFERATIVE DIABETIC RETINOPATHY WITHOUT MACULAR EDEMA, RIGHT EYE	ICD-10 Diagnosis	E10.3491
TYPE 1 DIABETES MELLITUS WITH SEVERE NONPROLIFERATIVE DIABETIC RETINOPATHY WITHOUT MACULAR EDEMA, LEFT EYE	ICD-10 Diagnosis	E10.3492
TYPE 1 DIABETES MELLITUS WITH SEVERE NONPROLIFERATIVE DIABETIC RETINOPATHY WITHOUT MACULAR EDEMA, BILATERAL	ICD-10 Diagnosis	E10.3493
TYPE 1 DIABETES MELLITUS WITH SEVERE NONPROLIFERATIVE DIABETIC RETINOPATHY WITHOUT MACULAR EDEMA, UNSPECIFIED EYE	ICD-10 Diagnosis	E10.3499
TYPE 1 DIABETES MELLITUS WITH PROLIFERATIVE DIABETIC RETINOPATHY	ICD-10 Diagnosis	E10.35
TYPE 1 DIABETES MELLITUS WITH PROLIFERATIVE DIABETIC RETINOPATHY WITH MACULAR EDEMA	ICD-10 Diagnosis	E10.351
TYPE 1 DIABETES MELLITUS WITH PROLIFERATIVE DIABETIC RETINOPATHY WITH MACULAR EDEMA, RIGHT EYE	ICD-10 Diagnosis	E10.3511
TYPE 1 DIABETES MELLITUS WITH PROLIFERATIVE DIABETIC RETINOPATHY WITH MACULAR EDEMA, LEFT EYE	ICD-10 Diagnosis	E10.3512
TYPE 1 DIABETES MELLITUS WITH PROLIFERATIVE DIABETIC RETINOPATHY WITH MACULAR EDEMA, BILATERAL	ICD-10 Diagnosis	E10.3513
TYPE 1 DIABETES MELLITUS WITH PROLIFERATIVE DIABETIC RETINOPATHY WITH MACULAR EDEMA, UNSPECIFIED EYE	ICD-10 Diagnosis	E10.3519
TYPE 1 DIABETES MELLITUS WITH PROLIFERATIVE DIABETIC RETINOPATHY WITH TRACTION RETINAL DETACHMENT INVOLVING THE MACULA	ICD-10 Diagnosis	E10.352
TYPE 1 DIABETES MELLITUS WITH PROLIFERATIVE DIABETIC RETINOPATHY WITH TRACTION RETINAL DETACHMENT INVOLVING THE MACULA, RIGHT EYE	ICD-10 Diagnosis	E10.3521
TYPE 1 DIABETES MELLITUS WITH PROLIFERATIVE DIABETIC RETINOPATHY WITH TRACTION RETINAL DETACHMENT INVOLVING THE MACULA, LEFT EYE	ICD-10 Diagnosis	E10.3522
TYPE 1 DIABETES MELLITUS WITH PROLIFERATIVE DIABETIC RETINOPATHY WITH TRACTION RETINAL DETACHMENT INVOLVING THE MACULA, BILATERAL	ICD-10 Diagnosis	E10.3523
TYPE 1 DIABETES MELLITUS WITH PROLIFERATIVE DIABETIC RETINOPATHY WITH TRACTION RETINAL DETACHMENT INVOLVING THE MACULA, UNSPECIFIED EYE	ICD-10 Diagnosis	E10.3529
TYPE 1 DIABETES MELLITUS WITH PROLIFERATIVE DIABETIC RETINOPATHY WITH TRACTION RETINAL DETACHMENT NOT INVOLVING THE MACULA	ICD-10 Diagnosis	E10.353
TYPE 1 DIABETES MELLITUS WITH PROLIFERATIVE DIABETIC RETINOPATHY WITH TRACTION RETINAL DETACHMENT NOT INVOLVING THE MACULA, RIGHT EYE	ICD-10 Diagnosis	E10.3531
TYPE 1 DIABETES MELLITUS WITH PROLIFERATIVE DIABETIC RETINOPATHY WITH TRACTION RETINAL DETACHMENT NOT INVOLVING THE MACULA, LEFT EYE	ICD-10 Diagnosis	E10.3532
TYPE 1 DIABETES MELLITUS WITH PROLIFERATIVE DIABETIC RETINOPATHY WITH TRACTION RETINAL DETACHMENT NOT INVOLVING THE MACULA, BILATERAL	ICD-10 Diagnosis	E10.3533
TYPE 1 DIABETES MELLITUS WITH PROLIFERATIVE DIABETIC RETINOPATHY WITH TRACTION RETINAL DETACHMENT NOT INVOLVING THE MACULA, UNSPECIFIED EYE	ICD-10 Diagnosis	E10.3539
TYPE 1 DIABETES MELLITUS WITH PROLIFERATIVE DIABETIC RETINOPATHY WITH COMBINED TRACTION RETINAL DETACHMENT AND RHEGMATOGENOUS RETINAL DETACHMENT	ICD-10 Diagnosis	E10.354
TYPE 1 DIABETES MELLITUS WITH PROLIFERATIVE DIABETIC RETINOPATHY WITH COMBINED TRACTION RETINAL DETACHMENT AND RHEGMATOGENOUS RETINAL DETACHMENT, RIGHT EYE	ICD-10 Diagnosis	E10.3541
TYPE 1 DIABETES MELLITUS WITH PROLIFERATIVE DIABETIC RETINOPATHY WITH COMBINED TRACTION RETINAL DETACHMENT AND RHEGMATOGENOUS RETINAL DETACHMENT, LEFT EYE	ICD-10 Diagnosis	E10.3542
TYPE 1 DIABETES MELLITUS WITH PROLIFERATIVE DIABETIC RETINOPATHY WITH COMBINED TRACTION RETINAL DETACHMENT AND RHEGMATOGENOUS RETINAL DETACHMENT, BILATERAL	ICD-10 Diagnosis	E10.3543
TYPE 1 DIABETES MELLITUS WITH PROLIFERATIVE DIABETIC RETINOPATHY WITH COMBINED TRACTION RETINAL DETACHMENT AND RHEGMATOGENOUS RETINAL DETACHMENT, UNSPECIFIED EYE	ICD-10 Diagnosis	E10.3549
TYPE 1 DIABETES MELLITUS WITH STABLE PROLIFERATIVE DIABETIC RETINOPATHY	ICD-10 Diagnosis	E10.355
TYPE 1 DIABETES MELLITUS WITH STABLE PROLIFERATIVE DIABETIC RETINOPATHY, RIGHT EYE	ICD-10 Diagnosis	E10.3551
TYPE 1 DIABETES MELLITUS WITH STABLE PROLIFERATIVE DIABETIC RETINOPATHY, LEFT EYE	ICD-10 Diagnosis	E10.3552
TYPE 1 DIABETES MELLITUS WITH STABLE PROLIFERATIVE DIABETIC RETINOPATHY, BILATERAL	ICD-10 Diagnosis	E10.3553
TYPE 1 DIABETES MELLITUS WITH STABLE PROLIFERATIVE DIABETIC RETINOPATHY, UNSPECIFIED EYE	ICD-10 Diagnosis	E10.3559
TYPE 1 DIABETES MELLITUS WITH PROLIFERATIVE DIABETIC RETINOPATHY WITHOUT MACULAR EDEMA	ICD-10 Diagnosis	E10.359
TYPE 1 DIABETES MELLITUS WITH PROLIFERATIVE DIABETIC RETINOPATHY WITHOUT MACULAR EDEMA, RIGHT EYE	ICD-10 Diagnosis	E10.3591
TYPE 1 DIABETES MELLITUS WITH PROLIFERATIVE DIABETIC RETINOPATHY WITHOUT MACULAR EDEMA, LEFT EYE	ICD-10 Diagnosis	E10.3592
TYPE 1 DIABETES MELLITUS WITH PROLIFERATIVE DIABETIC RETINOPATHY WITHOUT MACULAR EDEMA, BILATERAL	ICD-10 Diagnosis	E10.3593
TYPE 1 DIABETES MELLITUS WITH PROLIFERATIVE DIABETIC RETINOPATHY WITHOUT MACULAR EDEMA, UNSPECIFIED EYE	ICD-10 Diagnosis	E10.3599
TYPE 1 DIABETES MELLITUS WITH DIABETIC CATARACT	ICD-10 Diagnosis	E10.36
TYPE 1 DIABETES MELLITUS WITH DIABETIC MACULAR EDEMA, RESOLVED FOLLOWING TREATMENT	ICD-10 Diagnosis	E10.37
TYPE 1 DIABETES MELLITUS WITH DIABETIC MACULAR EDEMA, RESOLVED FOLLOWING TREATMENT, RIGHT EYE	ICD-10 Diagnosis	E10.37X1
TYPE 1 DIABETES MELLITUS WITH DIABETIC MACULAR EDEMA, RESOLVED FOLLOWING TREATMENT, LEFT EYE	ICD-10 Diagnosis	E10.37X2
TYPE 1 DIABETES MELLITUS WITH DIABETIC MACULAR EDEMA, RESOLVED FOLLOWING TREATMENT, BILATERAL	ICD-10 Diagnosis	E10.37X3
TYPE 1 DIABETES MELLITUS WITH DIABETIC MACULAR EDEMA, RESOLVED FOLLOWING TREATMENT, UNSPECIFIED EYE	ICD-10 Diagnosis	E10.37X9
TYPE 1 DIABETES MELLITUS WITH OTHER DIABETIC OPHTHALMIC COMPLICATION	ICD-10 Diagnosis	E10.39
TYPE 1 DIABETES MELLITUS WITH NEUROLOGICAL COMPLICATIONS	ICD-10 Diagnosis	E10.4
TYPE 1 DIABETES MELLITUS WITH DIABETIC NEUROPATHY, UNSPECIFIED	ICD-10 Diagnosis	E10.40
TYPE 1 DIABETES MELLITUS WITH DIABETIC MONONEUROPATHY	ICD-10 Diagnosis	E10.41
TYPE 1 DIABETES MELLITUS WITH DIABETIC POLYNEUROPATHY	ICD-10 Diagnosis	E10.42
TYPE 1 DIABETES MELLITUS WITH DIABETIC AUTONOMIC (POLY)NEUROPATHY	ICD-10 Diagnosis	E10.43
TYPE 1 DIABETES MELLITUS WITH DIABETIC AMYOTROPHY	ICD-10 Diagnosis	E10.44
TYPE 1 DIABETES MELLITUS WITH OTHER DIABETIC NEUROLOGICAL COMPLICATION	ICD-10 Diagnosis	E10.49
TYPE 1 DIABETES MELLITUS WITH CIRCULATORY COMPLICATIONS	ICD-10 Diagnosis	E10.5
TYPE 1 DIABETES MELLITUS WITH DIABETIC PERIPHERAL ANGIOPATHY WITHOUT GANGRENE	ICD-10 Diagnosis	E10.51
TYPE 1 DIABETES MELLITUS WITH DIABETIC PERIPHERAL ANGIOPATHY WITH GANGRENE	ICD-10 Diagnosis	E10.52
TYPE 1 DIABETES MELLITUS WITH OTHER CIRCULATORY COMPLICATIONS	ICD-10 Diagnosis	E10.59
TYPE 1 DIABETES MELLITUS WITH OTHER SPECIFIED COMPLICATIONS	ICD-10 Diagnosis	E10.6
TYPE 1 DIABETES MELLITUS WITH DIABETIC ARTHROPATHY	ICD-10 Diagnosis	E10.61
TYPE 1 DIABETES MELLITUS WITH DIABETIC NEUROPATHIC ARTHROPATHY	ICD-10 Diagnosis	E10.610
TYPE 1 DIABETES MELLITUS WITH OTHER DIABETIC ARTHROPATHY	ICD-10 Diagnosis	E10.618
TYPE 1 DIABETES MELLITUS WITH SKIN COMPLICATIONS	ICD-10 Diagnosis	E10.62
TYPE 1 DIABETES MELLITUS WITH DIABETIC DERMATITIS	ICD-10 Diagnosis	E10.620
TYPE 1 DIABETES MELLITUS WITH FOOT ULCER	ICD-10 Diagnosis	E10.621
TYPE 1 DIABETES MELLITUS WITH OTHER SKIN ULCER	ICD-10 Diagnosis	E10.622
TYPE 1 DIABETES MELLITUS WITH OTHER SKIN COMPLICATIONS	ICD-10 Diagnosis	E10.628
TYPE 1 DIABETES MELLITUS WITH ORAL COMPLICATIONS	ICD-10 Diagnosis	E10.63
TYPE 1 DIABETES MELLITUS WITH PERIODONTAL DISEASE	ICD-10 Diagnosis	E10.630
TYPE 1 DIABETES MELLITUS WITH OTHER ORAL COMPLICATIONS	ICD-10 Diagnosis	E10.638
TYPE 1 DIABETES MELLITUS WITH HYPOGLYCEMIA	ICD-10 Diagnosis	E10.64
TYPE 1 DIABETES MELLITUS WITH HYPOGLYCEMIA WITH COMA	ICD-10 Diagnosis	E10.641
TYPE 1 DIABETES MELLITUS WITH HYPOGLYCEMIA WITHOUT COMA	ICD-10 Diagnosis	E10.649
TYPE 1 DIABETES MELLITUS WITH HYPERGLYCEMIA	ICD-10 Diagnosis	E10.65
TYPE 1 DIABETES MELLITUS WITH OTHER SPECIFIED COMPLICATION	ICD-10 Diagnosis	E10.69
TYPE 1 DIABETES MELLITUS WITH UNSPECIFIED COMPLICATIONS	ICD-10 Diagnosis	E10.8
TYPE 1 DIABETES MELLITUS WITHOUT COMPLICATIONS	ICD-10 Diagnosis	E10.9
TYPE 2 DIABETES MELLITUS	ICD-10 Diagnosis	E11
TYPE 2 DIABETES MELLITUS WITH HYPEROSMOLARITY	ICD-10 Diagnosis	E11.0
TYPE 2 DIABETES MELLITUS WITH HYPEROSMOLARITY WITHOUT NONKETOTIC HYPERGLYCEMIC-HYPEROSMOLAR COMA (NKHHC)	ICD-10 Diagnosis	E11.00
TYPE 2 DIABETES MELLITUS WITH HYPEROSMOLARITY WITH COMA	ICD-10 Diagnosis	E11.01
TYPE 2 DIABETES MELLITUS WITH KETOACIDOSIS	ICD-10 Diagnosis	E11.1
TYPE 2 DIABETES MELLITUS WITH KETOACIDOSIS WITHOUT COMA	ICD-10 Diagnosis	E11.10
TYPE 2 DIABETES MELLITUS WITH KETOACIDOSIS WITH COMA	ICD-10 Diagnosis	E11.11
TYPE 2 DIABETES MELLITUS WITH KIDNEY COMPLICATIONS	ICD-10 Diagnosis	E11.2
TYPE 2 DIABETES MELLITUS WITH DIABETIC NEPHROPATHY	ICD-10 Diagnosis	E11.21
TYPE 2 DIABETES MELLITUS WITH DIABETIC CHRONIC KIDNEY DISEASE	ICD-10 Diagnosis	E11.22
TYPE 2 DIABETES MELLITUS WITH OTHER DIABETIC KIDNEY COMPLICATION	ICD-10 Diagnosis	E11.29
TYPE 2 DIABETES MELLITUS WITH OPHTHALMIC COMPLICATIONS	ICD-10 Diagnosis	E11.3
TYPE 2 DIABETES MELLITUS WITH UNSPECIFIED DIABETIC RETINOPATHY	ICD-10 Diagnosis	E11.31
TYPE 2 DIABETES MELLITUS WITH UNSPECIFIED DIABETIC RETINOPATHY WITH MACULAR EDEMA	ICD-10 Diagnosis	E11.311
TYPE 2 DIABETES MELLITUS WITH UNSPECIFIED DIABETIC RETINOPATHY WITHOUT MACULAR EDEMA	ICD-10 Diagnosis	E11.319
TYPE 2 DIABETES MELLITUS WITH MILD NONPROLIFERATIVE DIABETIC RETINOPATHY	ICD-10 Diagnosis	E11.32
TYPE 2 DIABETES MELLITUS WITH MILD NONPROLIFERATIVE DIABETIC RETINOPATHY WITH MACULAR EDEMA	ICD-10 Diagnosis	E11.321
TYPE 2 DIABETES MELLITUS WITH MILD NONPROLIFERATIVE DIABETIC RETINOPATHY WITH MACULAR EDEMA, RIGHT EYE	ICD-10 Diagnosis	E11.3211
TYPE 2 DIABETES MELLITUS WITH MILD NONPROLIFERATIVE DIABETIC RETINOPATHY WITH MACULAR EDEMA, LEFT EYE	ICD-10 Diagnosis	E11.3212
TYPE 2 DIABETES MELLITUS WITH MILD NONPROLIFERATIVE DIABETIC RETINOPATHY WITH MACULAR EDEMA, BILATERAL	ICD-10 Diagnosis	E11.3213
TYPE 2 DIABETES MELLITUS WITH MILD NONPROLIFERATIVE DIABETIC RETINOPATHY WITH MACULAR EDEMA, UNSPECIFIED EYE	ICD-10 Diagnosis	E11.3219
TYPE 2 DIABETES MELLITUS WITH MILD NONPROLIFERATIVE DIABETIC RETINOPATHY WITHOUT MACULAR EDEMA	ICD-10 Diagnosis	E11.329
TYPE 2 DIABETES MELLITUS WITH MILD NONPROLIFERATIVE DIABETIC RETINOPATHY WITHOUT MACULAR EDEMA, RIGHT EYE	ICD-10 Diagnosis	E11.3291
TYPE 2 DIABETES MELLITUS WITH MILD NONPROLIFERATIVE DIABETIC RETINOPATHY WITHOUT MACULAR EDEMA, LEFT EYE	ICD-10 Diagnosis	E11.3292
TYPE 2 DIABETES MELLITUS WITH MILD NONPROLIFERATIVE DIABETIC RETINOPATHY WITHOUT MACULAR EDEMA, BILATERAL	ICD-10 Diagnosis	E11.3293
TYPE 2 DIABETES MELLITUS WITH MILD NONPROLIFERATIVE DIABETIC RETINOPATHY WITHOUT MACULAR EDEMA, UNSPECIFIED EYE	ICD-10 Diagnosis	E11.3299
TYPE 2 DIABETES MELLITUS WITH MODERATE NONPROLIFERATIVE DIABETIC RETINOPATHY	ICD-10 Diagnosis	E11.33
TYPE 2 DIABETES MELLITUS WITH MODERATE NONPROLIFERATIVE DIABETIC RETINOPATHY WITH MACULAR EDEMA	ICD-10 Diagnosis	E11.331
TYPE 2 DIABETES MELLITUS WITH MODERATE NONPROLIFERATIVE DIABETIC RETINOPATHY WITH MACULAR EDEMA, RIGHT EYE	ICD-10 Diagnosis	E11.3311
TYPE 2 DIABETES MELLITUS WITH MODERATE NONPROLIFERATIVE DIABETIC RETINOPATHY WITH MACULAR EDEMA, LEFT EYE	ICD-10 Diagnosis	E11.3312
TYPE 2 DIABETES MELLITUS WITH MODERATE NONPROLIFERATIVE DIABETIC RETINOPATHY WITH MACULAR EDEMA, BILATERAL	ICD-10 Diagnosis	E11.3313
TYPE 2 DIABETES MELLITUS WITH MODERATE NONPROLIFERATIVE DIABETIC RETINOPATHY WITH MACULAR EDEMA, UNSPECIFIED EYE	ICD-10 Diagnosis	E11.3319
TYPE 2 DIABETES MELLITUS WITH MODERATE NONPROLIFERATIVE DIABETIC RETINOPATHY WITHOUT MACULAR EDEMA	ICD-10 Diagnosis	E11.339
TYPE 2 DIABETES MELLITUS WITH MODERATE NONPROLIFERATIVE DIABETIC RETINOPATHY WITHOUT MACULAR EDEMA, RIGHT EYE	ICD-10 Diagnosis	E11.3391
TYPE 2 DIABETES MELLITUS WITH MODERATE NONPROLIFERATIVE DIABETIC RETINOPATHY WITHOUT MACULAR EDEMA, LEFT EYE	ICD-10 Diagnosis	E11.3392
TYPE 2 DIABETES MELLITUS WITH MODERATE NONPROLIFERATIVE DIABETIC RETINOPATHY WITHOUT MACULAR EDEMA, BILATERAL	ICD-10 Diagnosis	E11.3393
TYPE 2 DIABETES MELLITUS WITH MODERATE NONPROLIFERATIVE DIABETIC RETINOPATHY WITHOUT MACULAR EDEMA, UNSPECIFIED EYE	ICD-10 Diagnosis	E11.3399
TYPE 2 DIABETES MELLITUS WITH SEVERE NONPROLIFERATIVE DIABETIC RETINOPATHY	ICD-10 Diagnosis	E11.34
TYPE 2 DIABETES MELLITUS WITH SEVERE NONPROLIFERATIVE DIABETIC RETINOPATHY WITH MACULAR EDEMA	ICD-10 Diagnosis	E11.341
TYPE 2 DIABETES MELLITUS WITH SEVERE NONPROLIFERATIVE DIABETIC RETINOPATHY WITH MACULAR EDEMA, RIGHT EYE	ICD-10 Diagnosis	E11.3411
TYPE 2 DIABETES MELLITUS WITH SEVERE NONPROLIFERATIVE DIABETIC RETINOPATHY WITH MACULAR EDEMA, LEFT EYE	ICD-10 Diagnosis	E11.3412
TYPE 2 DIABETES MELLITUS WITH SEVERE NONPROLIFERATIVE DIABETIC RETINOPATHY WITH MACULAR EDEMA, BILATERAL	ICD-10 Diagnosis	E11.3413
TYPE 2 DIABETES MELLITUS WITH SEVERE NONPROLIFERATIVE DIABETIC RETINOPATHY WITH MACULAR EDEMA, UNSPECIFIED EYE	ICD-10 Diagnosis	E11.3419
TYPE 2 DIABETES MELLITUS WITH SEVERE NONPROLIFERATIVE DIABETIC RETINOPATHY WITHOUT MACULAR EDEMA	ICD-10 Diagnosis	E11.349
TYPE 2 DIABETES MELLITUS WITH SEVERE NONPROLIFERATIVE DIABETIC RETINOPATHY WITHOUT MACULAR EDEMA, RIGHT EYE	ICD-10 Diagnosis	E11.3491
TYPE 2 DIABETES MELLITUS WITH SEVERE NONPROLIFERATIVE DIABETIC RETINOPATHY WITHOUT MACULAR EDEMA, LEFT EYE	ICD-10 Diagnosis	E11.3492
TYPE 2 DIABETES MELLITUS WITH SEVERE NONPROLIFERATIVE DIABETIC RETINOPATHY WITHOUT MACULAR EDEMA, BILATERAL	ICD-10 Diagnosis	E11.3493
TYPE 2 DIABETES MELLITUS WITH SEVERE NONPROLIFERATIVE DIABETIC RETINOPATHY WITHOUT MACULAR EDEMA, UNSPECIFIED EYE	ICD-10 Diagnosis	E11.3499
TYPE 2 DIABETES MELLITUS WITH PROLIFERATIVE DIABETIC RETINOPATHY	ICD-10 Diagnosis	E11.35
TYPE 2 DIABETES MELLITUS WITH PROLIFERATIVE DIABETIC RETINOPATHY WITH MACULAR EDEMA	ICD-10 Diagnosis	E11.351
TYPE 2 DIABETES MELLITUS WITH PROLIFERATIVE DIABETIC RETINOPATHY WITH MACULAR EDEMA, RIGHT EYE	ICD-10 Diagnosis	E11.3511
TYPE 2 DIABETES MELLITUS WITH PROLIFERATIVE DIABETIC RETINOPATHY WITH MACULAR EDEMA, LEFT EYE	ICD-10 Diagnosis	E11.3512
TYPE 2 DIABETES MELLITUS WITH PROLIFERATIVE DIABETIC RETINOPATHY WITH MACULAR EDEMA, BILATERAL	ICD-10 Diagnosis	E11.3513
TYPE 2 DIABETES MELLITUS WITH PROLIFERATIVE DIABETIC RETINOPATHY WITH MACULAR EDEMA, UNSPECIFIED EYE	ICD-10 Diagnosis	E11.3519
TYPE 2 DIABETES MELLITUS WITH PROLIFERATIVE DIABETIC RETINOPATHY WITH TRACTION RETINAL DETACHMENT INVOLVING THE MACULA	ICD-10 Diagnosis	E11.352
TYPE 2 DIABETES MELLITUS WITH PROLIFERATIVE DIABETIC RETINOPATHY WITH TRACTION RETINAL DETACHMENT INVOLVING THE MACULA, RIGHT EYE	ICD-10 Diagnosis	E11.3521
TYPE 2 DIABETES MELLITUS WITH PROLIFERATIVE DIABETIC RETINOPATHY WITH TRACTION RETINAL DETACHMENT INVOLVING THE MACULA, LEFT EYE	ICD-10 Diagnosis	E11.3522
TYPE 2 DIABETES MELLITUS WITH PROLIFERATIVE DIABETIC RETINOPATHY WITH TRACTION RETINAL DETACHMENT INVOLVING THE MACULA, BILATERAL	ICD-10 Diagnosis	E11.3523
TYPE 2 DIABETES MELLITUS WITH PROLIFERATIVE DIABETIC RETINOPATHY WITH TRACTION RETINAL DETACHMENT INVOLVING THE MACULA, UNSPECIFIED EYE	ICD-10 Diagnosis	E11.3529
TYPE 2 DIABETES MELLITUS WITH PROLIFERATIVE DIABETIC RETINOPATHY WITH TRACTION RETINAL DETACHMENT NOT INVOLVING THE MACULA	ICD-10 Diagnosis	E11.353
TYPE 2 DIABETES MELLITUS WITH PROLIFERATIVE DIABETIC RETINOPATHY WITH TRACTION RETINAL DETACHMENT NOT INVOLVING THE MACULA, RIGHT EYE	ICD-10 Diagnosis	E11.3531
TYPE 2 DIABETES MELLITUS WITH PROLIFERATIVE DIABETIC RETINOPATHY WITH TRACTION RETINAL DETACHMENT NOT INVOLVING THE MACULA, LEFT EYE	ICD-10 Diagnosis	E11.3532
TYPE 2 DIABETES MELLITUS WITH PROLIFERATIVE DIABETIC RETINOPATHY WITH TRACTION RETINAL DETACHMENT NOT INVOLVING THE MACULA, BILATERAL	ICD-10 Diagnosis	E11.3533
TYPE 2 DIABETES MELLITUS WITH PROLIFERATIVE DIABETIC RETINOPATHY WITH TRACTION RETINAL DETACHMENT NOT INVOLVING THE MACULA, UNSPECIFIED EYE	ICD-10 Diagnosis	E11.3539
TYPE 2 DIABETES MELLITUS WITH PROLIFERATIVE DIABETIC RETINOPATHY WITH COMBINED TRACTION RETINAL DETACHMENT AND RHEGMATOGENOUS RETINAL DETACHMENT	ICD-10 Diagnosis	E11.354
TYPE 2 DIABETES MELLITUS WITH PROLIFERATIVE DIABETIC RETINOPATHY WITH COMBINED TRACTION RETINAL DETACHMENT AND RHEGMATOGENOUS RETINAL DETACHMENT, RIGHT EYE	ICD-10 Diagnosis	E11.3541
TYPE 2 DIABETES MELLITUS WITH PROLIFERATIVE DIABETIC RETINOPATHY WITH COMBINED TRACTION RETINAL DETACHMENT AND RHEGMATOGENOUS RETINAL DETACHMENT, LEFT EYE	ICD-10 Diagnosis	E11.3542
TYPE 2 DIABETES MELLITUS WITH PROLIFERATIVE DIABETIC RETINOPATHY WITH COMBINED TRACTION RETINAL DETACHMENT AND RHEGMATOGENOUS RETINAL DETACHMENT, BILATERAL	ICD-10 Diagnosis	E11.3543
TYPE 2 DIABETES MELLITUS WITH PROLIFERATIVE DIABETIC RETINOPATHY WITH COMBINED TRACTION RETINAL DETACHMENT AND RHEGMATOGENOUS RETINAL DETACHMENT, UNSPECIFIED EYE	ICD-10 Diagnosis	E11.3549
TYPE 2 DIABETES MELLITUS WITH STABLE PROLIFERATIVE DIABETIC RETINOPATHY	ICD-10 Diagnosis	E11.355
TYPE 2 DIABETES MELLITUS WITH STABLE PROLIFERATIVE DIABETIC RETINOPATHY, RIGHT EYE	ICD-10 Diagnosis	E11.3551
TYPE 2 DIABETES MELLITUS WITH STABLE PROLIFERATIVE DIABETIC RETINOPATHY, LEFT EYE	ICD-10 Diagnosis	E11.3552
TYPE 2 DIABETES MELLITUS WITH STABLE PROLIFERATIVE DIABETIC RETINOPATHY, BILATERAL	ICD-10 Diagnosis	E11.3553
TYPE 2 DIABETES MELLITUS WITH STABLE PROLIFERATIVE DIABETIC RETINOPATHY, UNSPECIFIED EYE	ICD-10 Diagnosis	E11.3559
TYPE 2 DIABETES MELLITUS WITH PROLIFERATIVE DIABETIC RETINOPATHY WITHOUT MACULAR EDEMA	ICD-10 Diagnosis	E11.359
TYPE 2 DIABETES MELLITUS WITH PROLIFERATIVE DIABETIC RETINOPATHY WITHOUT MACULAR EDEMA, RIGHT EYE	ICD-10 Diagnosis	E11.3591
TYPE 2 DIABETES MELLITUS WITH PROLIFERATIVE DIABETIC RETINOPATHY WITHOUT MACULAR EDEMA, LEFT EYE	ICD-10 Diagnosis	E11.3592
TYPE 2 DIABETES MELLITUS WITH PROLIFERATIVE DIABETIC RETINOPATHY WITHOUT MACULAR EDEMA, BILATERAL	ICD-10 Diagnosis	E11.3593
TYPE 2 DIABETES MELLITUS WITH PROLIFERATIVE DIABETIC RETINOPATHY WITHOUT MACULAR EDEMA, UNSPECIFIED EYE	ICD-10 Diagnosis	E11.3599
TYPE 2 DIABETES MELLITUS WITH DIABETIC CATARACT	ICD-10 Diagnosis	E11.36
TYPE 2 DIABETES MELLITUS WITH DIABETIC MACULAR EDEMA, RESOLVED FOLLOWING TREATMENT	ICD-10 Diagnosis	E11.37
TYPE 2 DIABETES MELLITUS WITH DIABETIC MACULAR EDEMA, RESOLVED FOLLOWING TREATMENT, RIGHT EYE	ICD-10 Diagnosis	E11.37X1
TYPE 2 DIABETES MELLITUS WITH DIABETIC MACULAR EDEMA, RESOLVED FOLLOWING TREATMENT, LEFT EYE	ICD-10 Diagnosis	E11.37X2
TYPE 2 DIABETES MELLITUS WITH DIABETIC MACULAR EDEMA, RESOLVED FOLLOWING TREATMENT, BILATERAL	ICD-10 Diagnosis	E11.37X3
TYPE 2 DIABETES MELLITUS WITH DIABETIC MACULAR EDEMA, RESOLVED FOLLOWING TREATMENT, UNSPECIFIED EYE	ICD-10 Diagnosis	E11.37X9
TYPE 2 DIABETES MELLITUS WITH OTHER DIABETIC OPHTHALMIC COMPLICATION	ICD-10 Diagnosis	E11.39
TYPE 2 DIABETES MELLITUS WITH NEUROLOGICAL COMPLICATIONS	ICD-10 Diagnosis	E11.4
TYPE 2 DIABETES MELLITUS WITH DIABETIC NEUROPATHY, UNSPECIFIED	ICD-10 Diagnosis	E11.40
TYPE 2 DIABETES MELLITUS WITH DIABETIC MONONEUROPATHY	ICD-10 Diagnosis	E11.41
TYPE 2 DIABETES MELLITUS WITH DIABETIC POLYNEUROPATHY	ICD-10 Diagnosis	E11.42
TYPE 2 DIABETES MELLITUS WITH DIABETIC AUTONOMIC (POLY)NEUROPATHY	ICD-10 Diagnosis	E11.43
TYPE 2 DIABETES MELLITUS WITH DIABETIC AMYOTROPHY	ICD-10 Diagnosis	E11.44
TYPE 2 DIABETES MELLITUS WITH OTHER DIABETIC NEUROLOGICAL COMPLICATION	ICD-10 Diagnosis	E11.49
TYPE 2 DIABETES MELLITUS WITH CIRCULATORY COMPLICATIONS	ICD-10 Diagnosis	E11.5
TYPE 2 DIABETES MELLITUS WITH DIABETIC PERIPHERAL ANGIOPATHY WITHOUT GANGRENE	ICD-10 Diagnosis	E11.51
TYPE 2 DIABETES MELLITUS WITH DIABETIC PERIPHERAL ANGIOPATHY WITH GANGRENE	ICD-10 Diagnosis	E11.52
TYPE 2 DIABETES MELLITUS WITH OTHER CIRCULATORY COMPLICATIONS	ICD-10 Diagnosis	E11.59
TYPE 2 DIABETES MELLITUS WITH OTHER SPECIFIED COMPLICATIONS	ICD-10 Diagnosis	E11.6
TYPE 2 DIABETES MELLITUS WITH DIABETIC ARTHROPATHY	ICD-10 Diagnosis	E11.61
TYPE 2 DIABETES MELLITUS WITH DIABETIC NEUROPATHIC ARTHROPATHY	ICD-10 Diagnosis	E11.610
TYPE 2 DIABETES MELLITUS WITH OTHER DIABETIC ARTHROPATHY	ICD-10 Diagnosis	E11.618
TYPE 2 DIABETES MELLITUS WITH SKIN COMPLICATIONS	ICD-10 Diagnosis	E11.62
TYPE 2 DIABETES MELLITUS WITH DIABETIC DERMATITIS	ICD-10 Diagnosis	E11.620
TYPE 2 DIABETES MELLITUS WITH FOOT ULCER	ICD-10 Diagnosis	E11.621
TYPE 2 DIABETES MELLITUS WITH OTHER SKIN ULCER	ICD-10 Diagnosis	E11.622
TYPE 2 DIABETES MELLITUS WITH OTHER SKIN COMPLICATIONS	ICD-10 Diagnosis	E11.628
TYPE 2 DIABETES MELLITUS WITH ORAL COMPLICATIONS	ICD-10 Diagnosis	E11.63
TYPE 2 DIABETES MELLITUS WITH PERIODONTAL DISEASE	ICD-10 Diagnosis	E11.630
TYPE 2 DIABETES MELLITUS WITH OTHER ORAL COMPLICATIONS	ICD-10 Diagnosis	E11.638
TYPE 2 DIABETES MELLITUS WITH HYPOGLYCEMIA	ICD-10 Diagnosis	E11.64
TYPE 2 DIABETES MELLITUS WITH HYPOGLYCEMIA WITH COMA	ICD-10 Diagnosis	E11.641
TYPE 2 DIABETES MELLITUS WITH HYPOGLYCEMIA WITHOUT COMA	ICD-10 Diagnosis	E11.649
TYPE 2 DIABETES MELLITUS WITH HYPERGLYCEMIA	ICD-10 Diagnosis	E11.65
TYPE 2 DIABETES MELLITUS WITH OTHER SPECIFIED COMPLICATION	ICD-10 Diagnosis	E11.69
TYPE 2 DIABETES MELLITUS WITH UNSPECIFIED COMPLICATIONS	ICD-10 Diagnosis	E11.8
TYPE 2 DIABETES MELLITUS WITHOUT COMPLICATIONS	ICD-10 Diagnosis	E11.9
OTHER SPECIFIED DIABETES MELLITUS	ICD-10 Diagnosis	E13
OTHER SPECIFIED DIABETES MELLITUS WITH HYPEROSMOLARITY	ICD-10 Diagnosis	E13.0
OTHER SPECIFIED DIABETES MELLITUS WITH HYPEROSMOLARITY WITHOUT NONKETOTIC HYPERGLYCEMIC-HYPEROSMOLAR COMA (NKHHC)	ICD-10 Diagnosis	E13.00
OTHER SPECIFIED DIABETES MELLITUS WITH HYPEROSMOLARITY WITH COMA	ICD-10 Diagnosis	E13.01
OTHER SPECIFIED DIABETES MELLITUS WITH KETOACIDOSIS	ICD-10 Diagnosis	E13.1
OTHER SPECIFIED DIABETES MELLITUS WITH KETOACIDOSIS WITHOUT COMA	ICD-10 Diagnosis	E13.10
OTHER SPECIFIED DIABETES MELLITUS WITH KETOACIDOSIS WITH COMA	ICD-10 Diagnosis	E13.11
OTHER SPECIFIED DIABETES MELLITUS WITH KIDNEY COMPLICATIONS	ICD-10 Diagnosis	E13.2
OTHER SPECIFIED DIABETES MELLITUS WITH DIABETIC NEPHROPATHY	ICD-10 Diagnosis	E13.21
OTHER SPECIFIED DIABETES MELLITUS WITH DIABETIC CHRONIC KIDNEY DISEASE	ICD-10 Diagnosis	E13.22
OTHER SPECIFIED DIABETES MELLITUS WITH OTHER DIABETIC KIDNEY COMPLICATION	ICD-10 Diagnosis	E13.29
OTHER SPECIFIED DIABETES MELLITUS WITH OPHTHALMIC COMPLICATIONS	ICD-10 Diagnosis	E13.3
OTHER SPECIFIED DIABETES MELLITUS WITH UNSPECIFIED DIABETIC RETINOPATHY	ICD-10 Diagnosis	E13.31
OTHER SPECIFIED DIABETES MELLITUS WITH UNSPECIFIED DIABETIC RETINOPATHY WITH MACULAR EDEMA	ICD-10 Diagnosis	E13.311
OTHER SPECIFIED DIABETES MELLITUS WITH UNSPECIFIED DIABETIC RETINOPATHY WITHOUT MACULAR EDEMA	ICD-10 Diagnosis	E13.319
OTHER SPECIFIED DIABETES MELLITUS WITH MILD NONPROLIFERATIVE DIABETIC RETINOPATHY	ICD-10 Diagnosis	E13.32
OTHER SPECIFIED DIABETES MELLITUS WITH MILD NONPROLIFERATIVE DIABETIC RETINOPATHY WITH MACULAR EDEMA	ICD-10 Diagnosis	E13.321
OTHER SPECIFIED DIABETES MELLITUS WITH MILD NONPROLIFERATIVE DIABETIC RETINOPATHY WITH MACULAR EDEMA, RIGHT EYE	ICD-10 Diagnosis	E13.3211
OTHER SPECIFIED DIABETES MELLITUS WITH MILD NONPROLIFERATIVE DIABETIC RETINOPATHY WITH MACULAR EDEMA, LEFT EYE	ICD-10 Diagnosis	E13.3212
OTHER SPECIFIED DIABETES MELLITUS WITH MILD NONPROLIFERATIVE DIABETIC RETINOPATHY WITH MACULAR EDEMA, BILATERAL	ICD-10 Diagnosis	E13.3213
OTHER SPECIFIED DIABETES MELLITUS WITH MILD NONPROLIFERATIVE DIABETIC RETINOPATHY WITH MACULAR EDEMA, UNSPECIFIED EYE	ICD-10 Diagnosis	E13.3219
OTHER SPECIFIED DIABETES MELLITUS WITH MILD NONPROLIFERATIVE DIABETIC RETINOPATHY WITHOUT MACULAR EDEMA	ICD-10 Diagnosis	E13.329
OTHER SPECIFIED DIABETES MELLITUS WITH MILD NONPROLIFERATIVE DIABETIC RETINOPATHY WITHOUT MACULAR EDEMA, RIGHT EYE	ICD-10 Diagnosis	E13.3291
OTHER SPECIFIED DIABETES MELLITUS WITH MILD NONPROLIFERATIVE DIABETIC RETINOPATHY WITHOUT MACULAR EDEMA, LEFT EYE	ICD-10 Diagnosis	E13.3292
OTHER SPECIFIED DIABETES MELLITUS WITH MILD NONPROLIFERATIVE DIABETIC RETINOPATHY WITHOUT MACULAR EDEMA, BILATERAL	ICD-10 Diagnosis	E13.3293
OTHER SPECIFIED DIABETES MELLITUS WITH MILD NONPROLIFERATIVE DIABETIC RETINOPATHY WITHOUT MACULAR EDEMA, UNSPECIFIED EYE	ICD-10 Diagnosis	E13.3299
OTHER SPECIFIED DIABETES MELLITUS WITH MODERATE NONPROLIFERATIVE DIABETIC RETINOPATHY	ICD-10 Diagnosis	E13.33
OTHER SPECIFIED DIABETES MELLITUS WITH MODERATE NONPROLIFERATIVE DIABETIC RETINOPATHY WITH MACULAR EDEMA	ICD-10 Diagnosis	E13.331
OTHER SPECIFIED DIABETES MELLITUS WITH MODERATE NONPROLIFERATIVE DIABETIC RETINOPATHY WITH MACULAR EDEMA, RIGHT EYE	ICD-10 Diagnosis	E13.3311
OTHER SPECIFIED DIABETES MELLITUS WITH MODERATE NONPROLIFERATIVE DIABETIC RETINOPATHY WITH MACULAR EDEMA, LEFT EYE	ICD-10 Diagnosis	E13.3312
OTHER SPECIFIED DIABETES MELLITUS WITH MODERATE NONPROLIFERATIVE DIABETIC RETINOPATHY WITH MACULAR EDEMA, BILATERAL	ICD-10 Diagnosis	E13.3313
OTHER SPECIFIED DIABETES MELLITUS WITH MODERATE NONPROLIFERATIVE DIABETIC RETINOPATHY WITH MACULAR EDEMA, UNSPECIFIED EYE	ICD-10 Diagnosis	E13.3319
OTHER SPECIFIED DIABETES MELLITUS WITH MODERATE NONPROLIFERATIVE DIABETIC RETINOPATHY WITHOUT MACULAR EDEMA	ICD-10 Diagnosis	E13.339
OTHER SPECIFIED DIABETES MELLITUS WITH MODERATE NONPROLIFERATIVE DIABETIC RETINOPATHY WITHOUT MACULAR EDEMA, RIGHT EYE	ICD-10 Diagnosis	E13.3391
OTHER SPECIFIED DIABETES MELLITUS WITH MODERATE NONPROLIFERATIVE DIABETIC RETINOPATHY WITHOUT MACULAR EDEMA, LEFT EYE	ICD-10 Diagnosis	E13.3392
OTHER SPECIFIED DIABETES MELLITUS WITH MODERATE NONPROLIFERATIVE DIABETIC RETINOPATHY WITHOUT MACULAR EDEMA, BILATERAL	ICD-10 Diagnosis	E13.3393
OTHER SPECIFIED DIABETES MELLITUS WITH MODERATE NONPROLIFERATIVE DIABETIC RETINOPATHY WITHOUT MACULAR EDEMA, UNSPECIFIED EYE	ICD-10 Diagnosis	E13.3399
OTHER SPECIFIED DIABETES MELLITUS WITH SEVERE NONPROLIFERATIVE DIABETIC RETINOPATHY	ICD-10 Diagnosis	E13.34
OTHER SPECIFIED DIABETES MELLITUS WITH SEVERE NONPROLIFERATIVE DIABETIC RETINOPATHY WITH MACULAR EDEMA	ICD-10 Diagnosis	E13.341
OTHER SPECIFIED DIABETES MELLITUS WITH SEVERE NONPROLIFERATIVE DIABETIC RETINOPATHY WITH MACULAR EDEMA, RIGHT EYE	ICD-10 Diagnosis	E13.3411
OTHER SPECIFIED DIABETES MELLITUS WITH SEVERE NONPROLIFERATIVE DIABETIC RETINOPATHY WITH MACULAR EDEMA, LEFT EYE	ICD-10 Diagnosis	E13.3412
OTHER SPECIFIED DIABETES MELLITUS WITH SEVERE NONPROLIFERATIVE DIABETIC RETINOPATHY WITH MACULAR EDEMA, BILATERAL	ICD-10 Diagnosis	E13.3413
OTHER SPECIFIED DIABETES MELLITUS WITH SEVERE NONPROLIFERATIVE DIABETIC RETINOPATHY WITH MACULAR EDEMA, UNSPECIFIED EYE	ICD-10 Diagnosis	E13.3419
OTHER SPECIFIED DIABETES MELLITUS WITH SEVERE NONPROLIFERATIVE DIABETIC RETINOPATHY WITHOUT MACULAR EDEMA	ICD-10 Diagnosis	E13.349
OTHER SPECIFIED DIABETES MELLITUS WITH SEVERE NONPROLIFERATIVE DIABETIC RETINOPATHY WITHOUT MACULAR EDEMA, RIGHT EYE	ICD-10 Diagnosis	E13.3491
OTHER SPECIFIED DIABETES MELLITUS WITH SEVERE NONPROLIFERATIVE DIABETIC RETINOPATHY WITHOUT MACULAR EDEMA, LEFT EYE	ICD-10 Diagnosis	E13.3492
OTHER SPECIFIED DIABETES MELLITUS WITH SEVERE NONPROLIFERATIVE DIABETIC RETINOPATHY WITHOUT MACULAR EDEMA, BILATERAL	ICD-10 Diagnosis	E13.3493
OTHER SPECIFIED DIABETES MELLITUS WITH SEVERE NONPROLIFERATIVE DIABETIC RETINOPATHY WITHOUT MACULAR EDEMA, UNSPECIFIED EYE	ICD-10 Diagnosis	E13.3499
OTHER SPECIFIED DIABETES MELLITUS WITH PROLIFERATIVE DIABETIC RETINOPATHY	ICD-10 Diagnosis	E13.35
OTHER SPECIFIED DIABETES MELLITUS WITH PROLIFERATIVE DIABETIC RETINOPATHY WITH MACULAR EDEMA	ICD-10 Diagnosis	E13.351
OTHER SPECIFIED DIABETES MELLITUS WITH PROLIFERATIVE DIABETIC RETINOPATHY WITH MACULAR EDEMA, RIGHT EYE	ICD-10 Diagnosis	E13.3511
OTHER SPECIFIED DIABETES MELLITUS WITH PROLIFERATIVE DIABETIC RETINOPATHY WITH MACULAR EDEMA, LEFT EYE	ICD-10 Diagnosis	E13.3512
OTHER SPECIFIED DIABETES MELLITUS WITH PROLIFERATIVE DIABETIC RETINOPATHY WITH MACULAR EDEMA, BILATERAL	ICD-10 Diagnosis	E13.3513
OTHER SPECIFIED DIABETES MELLITUS WITH PROLIFERATIVE DIABETIC RETINOPATHY WITH MACULAR EDEMA, UNSPECIFIED EYE	ICD-10 Diagnosis	E13.3519
OTHER SPECIFIED DIABETES MELLITUS WITH PROLIFERATIVE DIABETIC RETINOPATHY WITH TRACTION RETINAL DETACHMENT INVOLVING THE MACULA	ICD-10 Diagnosis	E13.352
OTHER SPECIFIED DIABETES MELLITUS WITH PROLIFERATIVE DIABETIC RETINOPATHY WITH TRACTION RETINAL DETACHMENT INVOLVING THE MACULA, RIGHT EYE	ICD-10 Diagnosis	E13.3521
OTHER SPECIFIED DIABETES MELLITUS WITH PROLIFERATIVE DIABETIC RETINOPATHY WITH TRACTION RETINAL DETACHMENT INVOLVING THE MACULA, LEFT EYE	ICD-10 Diagnosis	E13.3522
OTHER SPECIFIED DIABETES MELLITUS WITH PROLIFERATIVE DIABETIC RETINOPATHY WITH TRACTION RETINAL DETACHMENT INVOLVING THE MACULA, BILATERAL	ICD-10 Diagnosis	E13.3523
OTHER SPECIFIED DIABETES MELLITUS WITH PROLIFERATIVE DIABETIC RETINOPATHY WITH TRACTION RETINAL DETACHMENT INVOLVING THE MACULA, UNSPECIFIED EYE	ICD-10 Diagnosis	E13.3529
OTHER SPECIFIED DIABETES MELLITUS WITH PROLIFERATIVE DIABETIC RETINOPATHY WITH TRACTION RETINAL DETACHMENT NOT INVOLVING THE MACULA	ICD-10 Diagnosis	E13.353
OTHER SPECIFIED DIABETES MELLITUS WITH PROLIFERATIVE DIABETIC RETINOPATHY WITH TRACTION RETINAL DETACHMENT NOT INVOLVING THE MACULA, RIGHT EYE	ICD-10 Diagnosis	E13.3531
OTHER SPECIFIED DIABETES MELLITUS WITH PROLIFERATIVE DIABETIC RETINOPATHY WITH TRACTION RETINAL DETACHMENT NOT INVOLVING THE MACULA, LEFT EYE	ICD-10 Diagnosis	E13.3532
OTHER SPECIFIED DIABETES MELLITUS WITH PROLIFERATIVE DIABETIC RETINOPATHY WITH TRACTION RETINAL DETACHMENT NOT INVOLVING THE MACULA, BILATERAL	ICD-10 Diagnosis	E13.3533
OTHER SPECIFIED DIABETES MELLITUS WITH PROLIFERATIVE DIABETIC RETINOPATHY WITH TRACTION RETINAL DETACHMENT NOT INVOLVING THE MACULA, UNSPECIFIED EYE	ICD-10 Diagnosis	E13.3539
OTHER SPECIFIED DIABETES MELLITUS WITH PROLIFERATIVE DIABETIC RETINOPATHY WITH COMBINED TRACTION RETINAL DETACHMENT AND RHEGMATOGENOUS RETINAL DETACHMENT	ICD-10 Diagnosis	E13.354
OTHER SPECIFIED DIABETES MELLITUS WITH PROLIFERATIVE DIABETIC RETINOPATHY WITH COMBINED TRACTION RETINAL DETACHMENT AND RHEGMATOGENOUS RETINAL DETACHMENT, RIGHT EYE	ICD-10 Diagnosis	E13.3541
OTHER SPECIFIED DIABETES MELLITUS WITH PROLIFERATIVE DIABETIC RETINOPATHY WITH COMBINED TRACTION RETINAL DETACHMENT AND RHEGMATOGENOUS RETINAL DETACHMENT, LEFT EYE	ICD-10 Diagnosis	E13.3542
OTHER SPECIFIED DIABETES MELLITUS WITH PROLIFERATIVE DIABETIC RETINOPATHY WITH COMBINED TRACTION RETINAL DETACHMENT AND RHEGMATOGENOUS RETINAL DETACHMENT, BILATERAL	ICD-10 Diagnosis	E13.3543
OTHER SPECIFIED DIABETES MELLITUS WITH PROLIFERATIVE DIABETIC RETINOPATHY WITH COMBINED TRACTION RETINAL DETACHMENT AND RHEGMATOGENOUS RETINAL DETACHMENT, UNSPECIFIED EYE	ICD-10 Diagnosis	E13.3549
OTHER SPECIFIED DIABETES MELLITUS WITH STABLE PROLIFERATIVE DIABETIC RETINOPATHY	ICD-10 Diagnosis	E13.355
OTHER SPECIFIED DIABETES MELLITUS WITH STABLE PROLIFERATIVE DIABETIC RETINOPATHY, RIGHT EYE	ICD-10 Diagnosis	E13.3551
OTHER SPECIFIED DIABETES MELLITUS WITH STABLE PROLIFERATIVE DIABETIC RETINOPATHY, LEFT EYE	ICD-10 Diagnosis	E13.3552
OTHER SPECIFIED DIABETES MELLITUS WITH STABLE PROLIFERATIVE DIABETIC RETINOPATHY, BILATERAL	ICD-10 Diagnosis	E13.3553
OTHER SPECIFIED DIABETES MELLITUS WITH STABLE PROLIFERATIVE DIABETIC RETINOPATHY, UNSPECIFIED EYE	ICD-10 Diagnosis	E13.3559
OTHER SPECIFIED DIABETES MELLITUS WITH PROLIFERATIVE DIABETIC RETINOPATHY WITHOUT MACULAR EDEMA	ICD-10 Diagnosis	E13.359
OTHER SPECIFIED DIABETES MELLITUS WITH PROLIFERATIVE DIABETIC RETINOPATHY WITHOUT MACULAR EDEMA, RIGHT EYE	ICD-10 Diagnosis	E13.3591
OTHER SPECIFIED DIABETES MELLITUS WITH PROLIFERATIVE DIABETIC RETINOPATHY WITHOUT MACULAR EDEMA, LEFT EYE	ICD-10 Diagnosis	E13.3592
OTHER SPECIFIED DIABETES MELLITUS WITH PROLIFERATIVE DIABETIC RETINOPATHY WITHOUT MACULAR EDEMA, BILATERAL	ICD-10 Diagnosis	E13.3593
OTHER SPECIFIED DIABETES MELLITUS WITH PROLIFERATIVE DIABETIC RETINOPATHY WITHOUT MACULAR EDEMA, UNSPECIFIED EYE	ICD-10 Diagnosis	E13.3599
OTHER SPECIFIED DIABETES MELLITUS WITH DIABETIC CATARACT	ICD-10 Diagnosis	E13.36
OTHER SPECIFIED DIABETES MELLITUS WITH DIABETIC MACULAR EDEMA, RESOLVED FOLLOWING TREATMENT	ICD-10 Diagnosis	E13.37
OTHER SPECIFIED DIABETES MELLITUS WITH DIABETIC MACULAR EDEMA, RESOLVED FOLLOWING TREATMENT, RIGHT EYE	ICD-10 Diagnosis	E13.37X1
OTHER SPECIFIED DIABETES MELLITUS WITH DIABETIC MACULAR EDEMA, RESOLVED FOLLOWING TREATMENT, LEFT EYE	ICD-10 Diagnosis	E13.37X2
OTHER SPECIFIED DIABETES MELLITUS WITH DIABETIC MACULAR EDEMA, RESOLVED FOLLOWING TREATMENT, BILATERAL	ICD-10 Diagnosis	E13.37X3
OTHER SPECIFIED DIABETES MELLITUS WITH DIABETIC MACULAR EDEMA, RESOLVED FOLLOWING TREATMENT, UNSPECIFIED EYE	ICD-10 Diagnosis	E13.37X9
OTHER SPECIFIED DIABETES MELLITUS WITH OTHER DIABETIC OPHTHALMIC COMPLICATION	ICD-10 Diagnosis	E13.39
OTHER SPECIFIED DIABETES MELLITUS WITH NEUROLOGICAL COMPLICATIONS	ICD-10 Diagnosis	E13.4
OTHER SPECIFIED DIABETES MELLITUS WITH DIABETIC NEUROPATHY, UNSPECIFIED	ICD-10 Diagnosis	E13.40
OTHER SPECIFIED DIABETES MELLITUS WITH DIABETIC MONONEUROPATHY	ICD-10 Diagnosis	E13.41
OTHER SPECIFIED DIABETES MELLITUS WITH DIABETIC POLYNEUROPATHY	ICD-10 Diagnosis	E13.42
OTHER SPECIFIED DIABETES MELLITUS WITH DIABETIC AUTONOMIC (POLY)NEUROPATHY	ICD-10 Diagnosis	E13.43
OTHER SPECIFIED DIABETES MELLITUS WITH DIABETIC AMYOTROPHY	ICD-10 Diagnosis	E13.44
OTHER SPECIFIED DIABETES MELLITUS WITH OTHER DIABETIC NEUROLOGICAL COMPLICATION	ICD-10 Diagnosis	E13.49
OTHER SPECIFIED DIABETES MELLITUS WITH CIRCULATORY COMPLICATIONS	ICD-10 Diagnosis	E13.5
OTHER SPECIFIED DIABETES MELLITUS WITH DIABETIC PERIPHERAL ANGIOPATHY WITHOUT GANGRENE	ICD-10 Diagnosis	E13.51
OTHER SPECIFIED DIABETES MELLITUS WITH DIABETIC PERIPHERAL ANGIOPATHY WITH GANGRENE	ICD-10 Diagnosis	E13.52
OTHER SPECIFIED DIABETES MELLITUS WITH OTHER CIRCULATORY COMPLICATIONS	ICD-10 Diagnosis	E13.59
OTHER SPECIFIED DIABETES MELLITUS WITH OTHER SPECIFIED COMPLICATIONS	ICD-10 Diagnosis	E13.6
OTHER SPECIFIED DIABETES MELLITUS WITH DIABETIC ARTHROPATHY	ICD-10 Diagnosis	E13.61
OTHER SPECIFIED DIABETES MELLITUS WITH DIABETIC NEUROPATHIC ARTHROPATHY	ICD-10 Diagnosis	E13.610
OTHER SPECIFIED DIABETES MELLITUS WITH OTHER DIABETIC ARTHROPATHY	ICD-10 Diagnosis	E13.618
OTHER SPECIFIED DIABETES MELLITUS WITH SKIN COMPLICATIONS	ICD-10 Diagnosis	E13.62
OTHER SPECIFIED DIABETES MELLITUS WITH DIABETIC DERMATITIS	ICD-10 Diagnosis	E13.620
OTHER SPECIFIED DIABETES MELLITUS WITH FOOT ULCER	ICD-10 Diagnosis	E13.621
OTHER SPECIFIED DIABETES MELLITUS WITH OTHER SKIN ULCER	ICD-10 Diagnosis	E13.622
OTHER SPECIFIED DIABETES MELLITUS WITH OTHER SKIN COMPLICATIONS	ICD-10 Diagnosis	E13.628
OTHER SPECIFIED DIABETES MELLITUS WITH ORAL COMPLICATIONS	ICD-10 Diagnosis	E13.63
OTHER SPECIFIED DIABETES MELLITUS WITH PERIODONTAL DISEASE	ICD-10 Diagnosis	E13.630
OTHER SPECIFIED DIABETES MELLITUS WITH OTHER ORAL COMPLICATIONS	ICD-10 Diagnosis	E13.638
OTHER SPECIFIED DIABETES MELLITUS WITH HYPOGLYCEMIA	ICD-10 Diagnosis	E13.64
OTHER SPECIFIED DIABETES MELLITUS WITH HYPOGLYCEMIA WITH COMA	ICD-10 Diagnosis	E13.641
OTHER SPECIFIED DIABETES MELLITUS WITH HYPOGLYCEMIA WITHOUT COMA	ICD-10 Diagnosis	E13.649
OTHER SPECIFIED DIABETES MELLITUS WITH HYPERGLYCEMIA	ICD-10 Diagnosis	E13.65
OTHER SPECIFIED DIABETES MELLITUS WITH OTHER SPECIFIED COMPLICATION	ICD-10 Diagnosis	E13.69
OTHER SPECIFIED DIABETES MELLITUS WITH UNSPECIFIED COMPLICATIONS	ICD-10 Diagnosis	E13.8
OTHER SPECIFIED DIABETES MELLITUS WITHOUT COMPLICATIONS	ICD-10 Diagnosis	E13.9
DIABETES MELLITUS IN PREGNANCY, CHILDBIRTH, AND THE PUERPERIUM	ICD-10 Diagnosis	O24
PRE-EXISTING TYPE 1 DIABETES MELLITUS, IN PREGNANCY, CHILDBIRTH AND THE PUERPERIUM	ICD-10 Diagnosis	O24.0
PRE-EXISTING TYPE 1 DIABETES MELLITUS, IN PREGNANCY	ICD-10 Diagnosis	O24.01
PRE-EXISTING TYPE 1 DIABETES MELLITUS, IN PREGNANCY, FIRST TRIMESTER	ICD-10 Diagnosis	O24.011
PRE-EXISTING TYPE 1 DIABETES MELLITUS, IN PREGNANCY, SECOND TRIMESTER	ICD-10 Diagnosis	O24.012
PRE-EXISTING TYPE 1 DIABETES MELLITUS, IN PREGNANCY, THIRD TRIMESTER	ICD-10 Diagnosis	O24.013
PRE-EXISTING TYPE 1 DIABETES MELLITUS, IN PREGNANCY, UNSPECIFIED TRIMESTER	ICD-10 Diagnosis	O24.019
PRE-EXISTING TYPE 1 DIABETES MELLITUS, IN CHILDBIRTH	ICD-10 Diagnosis	O24.02
PRE-EXISTING TYPE 1 DIABETES MELLITUS, IN THE PUERPERIUM	ICD-10 Diagnosis	O24.03
PRE-EXISTING TYPE 2 DIABETES MELLITUS, IN PREGNANCY, CHILDBIRTH AND THE PUERPERIUM	ICD-10 Diagnosis	O24.1
PRE-EXISTING TYPE 2 DIABETES MELLITUS, IN PREGNANCY	ICD-10 Diagnosis	O24.11
PRE-EXISTING TYPE 2 DIABETES MELLITUS, IN PREGNANCY, FIRST TRIMESTER	ICD-10 Diagnosis	O24.111
PRE-EXISTING TYPE 2 DIABETES MELLITUS, IN PREGNANCY, SECOND TRIMESTER	ICD-10 Diagnosis	O24.112
PRE-EXISTING TYPE 2 DIABETES MELLITUS, IN PREGNANCY, THIRD TRIMESTER	ICD-10 Diagnosis	O24.113
PRE-EXISTING TYPE 2 DIABETES MELLITUS, IN PREGNANCY, UNSPECIFIED TRIMESTER	ICD-10 Diagnosis	O24.119
PRE-EXISTING TYPE 2 DIABETES MELLITUS, IN CHILDBIRTH	ICD-10 Diagnosis	O24.12
PRE-EXISTING TYPE 2 DIABETES MELLITUS, IN THE PUERPERIUM	ICD-10 Diagnosis	O24.13
UNSPECIFIED PRE-EXISTING DIABETES MELLITUS IN PREGNANCY, CHILDBIRTH AND THE PUERPERIUM	ICD-10 Diagnosis	O24.3
UNSPECIFIED PRE-EXISTING DIABETES MELLITUS IN PREGNANCY	ICD-10 Diagnosis	O24.31
UNSPECIFIED PRE-EXISTING DIABETES MELLITUS IN PREGNANCY, FIRST TRIMESTER	ICD-10 Diagnosis	O24.311
UNSPECIFIED PRE-EXISTING DIABETES MELLITUS IN PREGNANCY, SECOND TRIMESTER	ICD-10 Diagnosis	O24.312
UNSPECIFIED PRE-EXISTING DIABETES MELLITUS IN PREGNANCY, THIRD TRIMESTER	ICD-10 Diagnosis	O24.313
UNSPECIFIED PRE-EXISTING DIABETES MELLITUS IN PREGNANCY, UNSPECIFIED TRIMESTER	ICD-10 Diagnosis	O24.319
UNSPECIFIED PRE-EXISTING DIABETES MELLITUS IN CHILDBIRTH	ICD-10 Diagnosis	O24.32
UNSPECIFIED PRE-EXISTING DIABETES MELLITUS IN THE PUERPERIUM	ICD-10 Diagnosis	O24.33
OTHER PRE-EXISTING DIABETES MELLITUS IN PREGNANCY, CHILDBIRTH, AND THE PUERPERIUM	ICD-10 Diagnosis	O24.8
OTHER PRE-EXISTING DIABETES MELLITUS IN PREGNANCY	ICD-10 Diagnosis	O24.81
OTHER PRE-EXISTING DIABETES MELLITUS IN PREGNANCY, FIRST TRIMESTER	ICD-10 Diagnosis	O24.811
OTHER PRE-EXISTING DIABETES MELLITUS IN PREGNANCY, SECOND TRIMESTER	ICD-10 Diagnosis	O24.812
OTHER PRE-EXISTING DIABETES MELLITUS IN PREGNANCY, THIRD TRIMESTER	ICD-10 Diagnosis	O24.813
OTHER PRE-EXISTING DIABETES MELLITUS IN PREGNANCY, UNSPECIFIED TRIMESTER	ICD-10 Diagnosis	O24.819
OTHER PRE-EXISTING DIABETES MELLITUS IN CHILDBIRTH	ICD-10 Diagnosis	O24.82
OTHER PRE-EXISTING DIABETES MELLITUS IN THE PUERPERIUM	ICD-10 Diagnosis	O24.83
UNSPECIFIED DIABETES MELLITUS IN PREGNANCY, CHILDBIRTH AND THE PUERPERIUM	ICD-10 Diagnosis	O24.9
UNSPECIFIED DIABETES MELLITUS IN PREGNANCY	ICD-10 Diagnosis	O24.91
UNSPECIFIED DIABETES MELLITUS IN PREGNANCY, FIRST TRIMESTER	ICD-10 Diagnosis	O24.911
UNSPECIFIED DIABETES MELLITUS IN PREGNANCY, SECOND TRIMESTER	ICD-10 Diagnosis	O24.912
UNSPECIFIED DIABETES MELLITUS IN PREGNANCY, THIRD TRIMESTER	ICD-10 Diagnosis	O24.913
UNSPECIFIED DIABETES MELLITUS IN PREGNANCY, UNSPECIFIED TRIMESTER	ICD-10 Diagnosis	O24.919
UNSPECIFIED DIABETES MELLITUS IN CHILDBIRTH	ICD-10 Diagnosis	O24.92
UNSPECIFIED DIABETES MELLITUS IN THE PUERPERIUM	ICD-10 Diagnosis	O24.93
ADVERSE EFFECT OF INSULIN AND ORAL HYPOGLYCEMIC [ANTIDIABETIC] DRUGS, INITIAL ENCOUNTER	ICD-10 Diagnosis	T38.3X5A
ADVERSE EFFECT OF INSULIN AND ORAL HYPOGLYCEMIC [ANTIDIABETIC] DRUGS, SEQUELA	ICD-10 Diagnosis	T38.3X5S
BREAKDOWN (MECHANICAL) OF INSULIN PUMP	ICD-10 Diagnosis	T85.614
BREAKDOWN (MECHANICAL) OF INSULIN PUMP, INITIAL ENCOUNTER	ICD-10 Diagnosis	T85.614A
BREAKDOWN (MECHANICAL) OF INSULIN PUMP, SUBSEQUENT ENCOUNTER	ICD-10 Diagnosis	T85.614D
BREAKDOWN (MECHANICAL) OF INSULIN PUMP, SEQUELA	ICD-10 Diagnosis	T85.614S
INFECTION AND INFLAMMATORY REACTION DUE TO INSULIN PUMP	ICD-10 Diagnosis	T85.72
INFECTION AND INFLAMMATORY REACTION DUE TO INSULIN PUMP, INITIAL ENCOUNTER	ICD-10 Diagnosis	T85.72XA
INFECTION AND INFLAMMATORY REACTION DUE TO INSULIN PUMP, SUBSEQUENT ENCOUNTER	ICD-10 Diagnosis	T85.72XD
INFECTION AND INFLAMMATORY REACTION DUE TO INSULIN PUMP, SEQUELA	ICD-10 Diagnosis	T85.72XS
ENCOUNTER FOR FITTING AND ADJUSTMENT OF INSULIN PUMP	ICD-10 Diagnosis	Z46.81
LONG TERM (CURRENT) USE OF INSULIN	ICD-10 Diagnosis	Z79.4
LONG TERM (CURRENT) USE OF ORAL HYPOGLYCEMIC DRUGS	ICD-10 Diagnosis	Z79.84
SECONDARY DIABETES MELLITUS	ICD-9 Diagnosis	249
SECONDARY DIABETES MELLITUS WITHOUT MENTION OF COMPLICATION	ICD-9 Diagnosis	249.0
SECONDARY DIABETES MELLITUS WITHOUT MENTION OF COMPLICATION, NOT STATED AS UNCONTROLLED, OR UNSPECIFIED	ICD-9 Diagnosis	249.00
SECONDARY DIABETES MELLITUS WITHOUT MENTION OF COMPLICATION, UNCONTROLLED	ICD-9 Diagnosis	249.01
SECONDARY DIABETES MELLITUS WITH KETOACIDOSIS	ICD-9 Diagnosis	249.1
SECONDARY DIABETES MELLITUS WITH KETOACIDOSIS, NOT STATED AS UNCONTROLLED, OR UNSPECIFIED	ICD-9 Diagnosis	249.10
SECONDARY DIABETES MELLITUS WITH KETOACIDOSIS, UNCONTROLLED	ICD-9 Diagnosis	249.11
SECONDARY DIABETES MELLITUS WITH HYPEROSMOLARITY	ICD-9 Diagnosis	249.2
SECONDARY DIABETES MELLITUS WITH HYPEROSMOLARITY, NOT STATED AS UNCONTROLLED, OR UNSPECIFIED	ICD-9 Diagnosis	249.20
SECONDARY DIABETES MELLITUS WITH HYPEROSMOLARITY, UNCONTROLLED	ICD-9 Diagnosis	249.21
SECONDARY DIABETES MELLITUS WITH OTHER COMA	ICD-9 Diagnosis	249.3
SECONDARY DIABETES MELLITUS WITH OTHER COMA, NOT STATED AS UNCONTROLLED, OR UNSPECIFIED	ICD-9 Diagnosis	249.30
SECONDARY DIABETES MELLITUS WITH OTHER COMA, UNCONTROLLED	ICD-9 Diagnosis	249.31
SECONDARY DIABETES MELLITUS WITH RENAL MANIFESTATIONS	ICD-9 Diagnosis	249.4
SECONDARY DIABETES MELLITUS WITH RENAL MANIFESTATIONS, NOT STATED AS UNCONTROLLED, OR UNSPECIFIED	ICD-9 Diagnosis	249.40
SECONDARY DIABETES MELLITUS WITH RENAL MANIFESTATIONS, UNCONTROLLED	ICD-9 Diagnosis	249.41
SECONDARY DIABETES MELLITUS WITH OPHTHALMIC MANIFESTATIONS	ICD-9 Diagnosis	249.5
SECONDARY DIABETES MELLITUS WITH OPHTHALMIC MANIFESTATIONS, NOT STATED AS UNCONTROLLED, OR UNSPECIFIED	ICD-9 Diagnosis	249.50
SECONDARY DIABETES MELLITUS WITH OPHTHALMIC MANIFESTATIONS, UNCONTROLLED	ICD-9 Diagnosis	249.51
SECONDARY DIABETES MELLITUS WITH NEUROLOGICAL MANIFESTATIONS	ICD-9 Diagnosis	249.6
SECONDARY DIABETES MELLITUS WITH NEUROLOGICAL MANIFESTATIONS, NOT STATED AS UNCONTROLLED, OR UNSPECIFIED	ICD-9 Diagnosis	249.60
SECONDARY DIABETES MELLITUS WITH NEUROLOGICAL MANIFESTATIONS, UNCONTROLLED	ICD-9 Diagnosis	249.61
SECONDARY DIABETES MELLITUS WITH PERIPHERAL CIRCULATORY DISORDERS	ICD-9 Diagnosis	249.7
SECONDARY DIABETES MELLITUS WITH PERIPHERAL CIRCULATORY DISORDERS, NOT STATED AS UNCONTROLLED, OR UNSPECIFIED	ICD-9 Diagnosis	249.70
SECONDARY DIABETES MELLITUS WITH PERIPHERAL CIRCULATORY DISORDERS, UNCONTROLLED	ICD-9 Diagnosis	249.71
SECONDARY DIABETES MELLITUS WITH OTHER SPECIFIED MANIFESTATIONS	ICD-9 Diagnosis	249.8
SECONDARY DIABETES MELLITUS WITH OTHER SPECIFIED MANIFESTATIONS, NOT STATED AS UNCONTROLLED, OR UNSPECIFIED	ICD-9 Diagnosis	249.80
SECONDARY DIABETES MELLITUS WITH OTHER SPECIFIED MANIFESTATIONS, UNCONTROLLED	ICD-9 Diagnosis	249.81
SECONDARY DIABETES MELLITUS WITH UNSPECIFIED COMPLICATION	ICD-9 Diagnosis	249.9
SECONDARY DIABETES MELLITUS WITH UNSPECIFIED COMPLICATION, NOT STATED AS UNCONTROLLED, OR UNSPECIFIED	ICD-9 Diagnosis	249.90
SECONDARY DIABETES MELLITUS WITH UNSPECIFIED COMPLICATION, UNCONTROLLED	ICD-9 Diagnosis	249.91
DIABETES MELLITUS	ICD-9 Diagnosis	250
DIABETES MELLITUS WITHOUT MENTION OF COMPLICATION	ICD-9 Diagnosis	250.0
DIABETES MELLITUS WITHOUT MENTION OF COMPLICATION, TYPE II OR UNSPECIFIED TYPE, NOT STATED AS UNCONTROLLED	ICD-9 Diagnosis	250.00
DIABETES MELLITUS WITHOUT MENTION OF COMPLICATION, TYPE I [JUVENILE TYPE], NOT STATED AS UNCONTROLLED	ICD-9 Diagnosis	250.01
DIABETES MELLITUS WITHOUT MENTION OF COMPLICATION, TYPE II OR UNSPECIFIED TYPE, UNCONTROLLED	ICD-9 Diagnosis	250.02
DIABETES MELLITUS WITHOUT MENTION OF COMPLICATION, TYPE I [JUVENILE TYPE], UNCONTROLLED	ICD-9 Diagnosis	250.03
DIABETES WITH KETOACIDOSIS	ICD-9 Diagnosis	250.1
DIABETES WITH KETOACIDOSIS, TYPE II OR UNSPECIFIED TYPE, NOT STATED AS UNCONTROLLED	ICD-9 Diagnosis	250.10
DIABETES WITH KETOACIDOSIS, TYPE I [JUVENILE TYPE], NOT STATED AS UNCONTROLLED	ICD-9 Diagnosis	250.11
DIABETES WITH KETOACIDOSIS, TYPE II OR UNSPECIFIED TYPE, UNCONTROLLED	ICD-9 Diagnosis	250.12
DIABETES WITH KETOACIDOSIS, TYPE I [JUVENILE TYPE], UNCONTROLLED	ICD-9 Diagnosis	250.13
DIABETES WITH HYPEROSMOLARITY	ICD-9 Diagnosis	250.2
DIABETES WITH HYPEROSMOLARITY, TYPE II OR UNSPECIFIED TYPE, NOT STATED AS UNCONTROLLED	ICD-9 Diagnosis	250.20
DIABETES WITH HYPEROSMOLARITY, TYPE I [JUVENILE TYPE], NOT STATED AS UNCONTROLLED	ICD-9 Diagnosis	250.21
DIABETES WITH HYPEROSMOLARITY, TYPE II OR UNSPECIFIED TYPE, UNCONTROLLED	ICD-9 Diagnosis	250.22
DIABETES WITH HYPEROSMOLARITY, TYPE I [JUVENILE TYPE], UNCONTROLLED	ICD-9 Diagnosis	250.23
DIABETES WITH OTHER COMA	ICD-9 Diagnosis	250.3
DIABETES WITH OTHER COMA, TYPE II OR UNSPECIFIED TYPE, NOT STATED AS UNCONTROLLED	ICD-9 Diagnosis	250.30
DIABETES WITH OTHER COMA, TYPE I [JUVENILE TYPE], NOT STATED AS UNCONTROLLED	ICD-9 Diagnosis	250.31
DIABETES WITH OTHER COMA, TYPE II OR UNSPECIFIED TYPE, UNCONTROLLED	ICD-9 Diagnosis	250.32
DIABETES WITH OTHER COMA, TYPE I [JUVENILE TYPE], UNCONTROLLED	ICD-9 Diagnosis	250.33
DIABETES WITH RENAL MANIFESTATIONS	ICD-9 Diagnosis	250.4
DIABETES WITH RENAL MANIFESTATIONS, TYPE II OR UNSPECIFIED TYPE, NOT STATED AS UNCONTROLLED	ICD-9 Diagnosis	250.40
DIABETES WITH RENAL MANIFESTATIONS, TYPE I [JUVENILE TYPE], NOT STATED AS UNCONTROLLED	ICD-9 Diagnosis	250.41
DIABETES WITH RENAL MANIFESTATIONS, TYPE II OR UNSPECIFIED TYPE, UNCONTROLLED	ICD-9 Diagnosis	250.42
DIABETES WITH RENAL MANIFESTATIONS, TYPE I [JUVENILE TYPE], UNCONTROLLED	ICD-9 Diagnosis	250.43
DIABETES WITH OPHTHALMIC MANIFESTATIONS	ICD-9 Diagnosis	250.5
DIABETES WITH OPHTHALMIC MANIFESTATIONS, TYPE II OR UNSPECIFIED TYPE, NOT STATED AS UNCONTROLLED	ICD-9 Diagnosis	250.50
DIABETES WITH OPHTHALMIC MANIFESTATIONS, TYPE I [JUVENILE TYPE], NOT STATED AS UNCONTROLLED	ICD-9 Diagnosis	250.51
DIABETES WITH OPHTHALMIC MANIFESTATIONS, TYPE II OR UNSPECIFIED TYPE, UNCONTROLLED	ICD-9 Diagnosis	250.52
DIABETES WITH OPHTHALMIC MANIFESTATIONS, TYPE I [JUVENILE TYPE], UNCONTROLLED	ICD-9 Diagnosis	250.53
DIABETES WITH NEUROLOGICAL MANIFESTATIONS	ICD-9 Diagnosis	250.6
DIABETES WITH NEUROLOGICAL MANIFESTATIONS, TYPE II OR UNSPECIFIED TYPE, NOT STATED AS UNCONTROLLED	ICD-9 Diagnosis	250.60
DIABETES WITH NEUROLOGICAL MANIFESTATIONS, TYPE I [JUVENILE TYPE], NOT STATED AS UNCONTROLLED	ICD-9 Diagnosis	250.61
DIABETES WITH NEUROLOGICAL MANIFESTATIONS, TYPE II OR UNSPECIFIED TYPE, UNCONTROLLED	ICD-9 Diagnosis	250.62
DIABETES WITH NEUROLOGICAL MANIFESTATIONS, TYPE I [JUVENILE TYPE], UNCONTROLLED	ICD-9 Diagnosis	250.63
DIABETES WITH PERIPHERAL CIRCULATORY DISORDERS	ICD-9 Diagnosis	250.7
DIABETES WITH PERIPHERAL CIRCULATORY DISORDERS, TYPE II OR UNSPECIFIED TYPE, NOT STATED AS UNCONTROLLED	ICD-9 Diagnosis	250.70
DIABETES WITH PERIPHERAL CIRCULATORY DISORDERS, TYPE I [JUVENILE TYPE], NOT STATED AS UNCONTROLLED	ICD-9 Diagnosis	250.71
DIABETES WITH PERIPHERAL CIRCULATORY DISORDERS, TYPE II OR UNSPECIFIED TYPE, UNCONTROLLED	ICD-9 Diagnosis	250.72
DIABETES WITH PERIPHERAL CIRCULATORY DISORDERS, TYPE I [JUVENILE TYPE], UNCONTROLLED	ICD-9 Diagnosis	250.73
DIABETES WITH OTHER SPECIFIED MANIFESTATIONS	ICD-9 Diagnosis	250.8
DIABETES WITH OTHER SPECIFIED MANIFESTATIONS, TYPE II OR UNSPECIFIED TYPE, NOT STATED AS UNCONTROLLED	ICD-9 Diagnosis	250.80
DIABETES WITH OTHER SPECIFIED MANIFESTATIONS, TYPE I [JUVENILE TYPE], NOT STATED AS UNCONTROLLED	ICD-9 Diagnosis	250.81
DIABETES WITH OTHER SPECIFIED MANIFESTATIONS, TYPE II OR UNSPECIFIED TYPE, UNCONTROLLED	ICD-9 Diagnosis	250.82
DIABETES WITH OTHER SPECIFIED MANIFESTATIONS, TYPE I [JUVENILE TYPE], UNCONTROLLED	ICD-9 Diagnosis	250.83
DIABETES WITH UNSPECIFIED COMPLICATION	ICD-9 Diagnosis	250.9
DIABETES WITH UNSPECIFIED COMPLICATION, TYPE II OR UNSPECIFIED TYPE, NOT STATED AS UNCONTROLLED	ICD-9 Diagnosis	250.90
DIABETES WITH UNSPECIFIED COMPLICATION, TYPE I [JUVENILE TYPE], NOT STATED AS UNCONTROLLED	ICD-9 Diagnosis	250.91
DIABETES WITH UNSPECIFIED COMPLICATION, TYPE II OR UNSPECIFIED TYPE, UNCONTROLLED	ICD-9 Diagnosis	250.92
DIABETES WITH UNSPECIFIED COMPLICATION, TYPE I [JUVENILE TYPE], UNCONTROLLED	ICD-9 Diagnosis	250.93
DIABETES MELLITUS COMPLICATING PREGNANCY, CHILDBIRTH, OR THE PUERPERIUM	ICD-9 Diagnosis	648.0
DIABETES MELLITUS OF MOTHER, COMPLICATING PREGNANCY, CHILDBIRTH, OR THE PUERPERIUM, UNSPECIFIED AS TO EPISODE OF CARE OR NOT APPLICABLE	ICD-9 Diagnosis	648.00
DIABETES MELLITUS OF MOTHER, COMPLICATING PREGNANCY, CHILDBIRTH, OR THE PUERPERIUM, DELIVERED, WITH OR WITHOUT MENTION OF ANTEPARTUM CONDITION	ICD-9 Diagnosis	648.01
DIABETES MELLITUS OF MOTHER, COMPLICATING PREGNANCY, CHILDBIRTH, OR THE PUERPERIUM, DELIVERED, WITH MENTION OF POSTPARTUM COMPLICATION	ICD-9 Diagnosis	648.02
DIABETES MELLITUS OF MOTHER, COMPLICATING PREGNANCY, CHILDBIRTH, OR THE PUERPERIUM, ANTEPARTUM CONDITION OR COMPLICATION	ICD-9 Diagnosis	648.03
DIABETES MELLITUS OF MOTHER, COMPLICATING PREGNANCY, CHILDBIRTH, OR THE PUERPERIUM, POSTPARTUM CONDITION OR COMPLICATION	ICD-9 Diagnosis	648.04
INSULINS AND ANTIDIABETIC AGENTS CAUSING ADVERSE EFFECTS IN THERAPEUTIC USE	ICD-9 Diagnosis	E932.3
FITTING AND ADJUSTMENT OF INSULIN PUMP	ICD-9 Diagnosis	V53.91
LONG-TERM (CURRENT) USE OF INSULIN	ICD-9 Diagnosis	V58.67
ENCOUNTER FOR INSULIN PUMP TRAINING	ICD-9 Diagnosis	V65.46
EPILEPSY/SEIZURE DISORDER
EPILEPSY AND RECURRENT SEIZURES	ICD-10 Diagnosis	G40
LOCALIZATION-RELATED (FOCAL) (PARTIAL) IDIOPATHIC EPILEPSY AND EPILEPTIC SYNDROMES WITH SEIZURES OF LOCALIZED ONSET	ICD-10 Diagnosis	G40.0
LOCALIZATION-RELATED (FOCAL) (PARTIAL) IDIOPATHIC EPILEPSY AND EPILEPTIC SYNDROMES WITH SEIZURES OF LOCALIZED ONSET, NOT INTRACTABLE	ICD-10 Diagnosis	G40.00
LOCALIZATION-RELATED (FOCAL) (PARTIAL) IDIOPATHIC EPILEPSY AND EPILEPTIC SYNDROMES WITH SEIZURES OF LOCALIZED ONSET, NOT INTRACTABLE, WITH STATUS EPILEPTICUS	ICD-10 Diagnosis	G40.001
LOCALIZATION-RELATED (FOCAL) (PARTIAL) IDIOPATHIC EPILEPSY AND EPILEPTIC SYNDROMES WITH SEIZURES OF LOCALIZED ONSET, NOT INTRACTABLE, WITHOUT STATUS EPILEPTICUS	ICD-10 Diagnosis	G40.009
LOCALIZATION-RELATED (FOCAL) (PARTIAL) IDIOPATHIC EPILEPSY AND EPILEPTIC SYNDROMES WITH SEIZURES OF LOCALIZED ONSET, INTRACTABLE	ICD-10 Diagnosis	G40.01
LOCALIZATION-RELATED (FOCAL) (PARTIAL) IDIOPATHIC EPILEPSY AND EPILEPTIC SYNDROMES WITH SEIZURES OF LOCALIZED ONSET, INTRACTABLE, WITH STATUS EPILEPTICUS	ICD-10 Diagnosis	G40.011
LOCALIZATION-RELATED (FOCAL) (PARTIAL) IDIOPATHIC EPILEPSY AND EPILEPTIC SYNDROMES WITH SEIZURES OF LOCALIZED ONSET, INTRACTABLE, WITHOUT STATUS EPILEPTICUS	ICD-10 Diagnosis	G40.019
LOCALIZATION-RELATED (FOCAL) (PARTIAL) SYMPTOMATIC EPILEPSY AND EPILEPTIC SYNDROMES WITH SIMPLE PARTIAL SEIZURES	ICD-10 Diagnosis	G40.1
LOCALIZATION-RELATED (FOCAL) (PARTIAL) SYMPTOMATIC EPILEPSY AND EPILEPTIC SYNDROMES WITH SIMPLE PARTIAL SEIZURES, NOT INTRACTABLE	ICD-10 Diagnosis	G40.10
LOCALIZATION-RELATED (FOCAL) (PARTIAL) SYMPTOMATIC EPILEPSY AND EPILEPTIC SYNDROMES WITH SIMPLE PARTIAL SEIZURES, NOT INTRACTABLE, WITH STATUS EPILEPTICUS	ICD-10 Diagnosis	G40.101
LOCALIZATION-RELATED (FOCAL) (PARTIAL) SYMPTOMATIC EPILEPSY AND EPILEPTIC SYNDROMES WITH SIMPLE PARTIAL SEIZURES, NOT INTRACTABLE, WITHOUT STATUS EPILEPTICUS	ICD-10 Diagnosis	G40.109
LOCALIZATION-RELATED (FOCAL) (PARTIAL) SYMPTOMATIC EPILEPSY AND EPILEPTIC SYNDROMES WITH SIMPLE PARTIAL SEIZURES, INTRACTABLE	ICD-10 Diagnosis	G40.11
LOCALIZATION-RELATED (FOCAL) (PARTIAL) SYMPTOMATIC EPILEPSY AND EPILEPTIC SYNDROMES WITH SIMPLE PARTIAL SEIZURES, INTRACTABLE, WITH STATUS EPILEPTICUS	ICD-10 Diagnosis	G40.111
LOCALIZATION-RELATED (FOCAL) (PARTIAL) SYMPTOMATIC EPILEPSY AND EPILEPTIC SYNDROMES WITH SIMPLE PARTIAL SEIZURES, INTRACTABLE, WITHOUT STATUS EPILEPTICUS	ICD-10 Diagnosis	G40.119
LOCALIZATION-RELATED (FOCAL) (PARTIAL) SYMPTOMATIC EPILEPSY AND EPILEPTIC SYNDROMES WITH COMPLEX PARTIAL SEIZURES	ICD-10 Diagnosis	G40.2
LOCALIZATION-RELATED (FOCAL) (PARTIAL) SYMPTOMATIC EPILEPSY AND EPILEPTIC SYNDROMES WITH COMPLEX PARTIAL SEIZURES, NOT INTRACTABLE	ICD-10 Diagnosis	G40.20
LOCALIZATION-RELATED (FOCAL) (PARTIAL) SYMPTOMATIC EPILEPSY AND EPILEPTIC SYNDROMES WITH COMPLEX PARTIAL SEIZURES, NOT INTRACTABLE, WITH STATUS EPILEPTICUS	ICD-10 Diagnosis	G40.201
LOCALIZATION-RELATED (FOCAL) (PARTIAL) SYMPTOMATIC EPILEPSY AND EPILEPTIC SYNDROMES WITH COMPLEX PARTIAL SEIZURES, NOT INTRACTABLE, WITHOUT STATUS EPILEPTICUS	ICD-10 Diagnosis	G40.209
LOCALIZATION-RELATED (FOCAL) (PARTIAL) SYMPTOMATIC EPILEPSY AND EPILEPTIC SYNDROMES WITH COMPLEX PARTIAL SEIZURES, INTRACTABLE	ICD-10 Diagnosis	G40.21
LOCALIZATION-RELATED (FOCAL) (PARTIAL) SYMPTOMATIC EPILEPSY AND EPILEPTIC SYNDROMES WITH COMPLEX PARTIAL SEIZURES, INTRACTABLE, WITH STATUS EPILEPTICUS	ICD-10 Diagnosis	G40.211
LOCALIZATION-RELATED (FOCAL) (PARTIAL) SYMPTOMATIC EPILEPSY AND EPILEPTIC SYNDROMES WITH COMPLEX PARTIAL SEIZURES, INTRACTABLE, WITHOUT STATUS EPILEPTICUS	ICD-10 Diagnosis	G40.219
GENERALIZED IDIOPATHIC EPILEPSY AND EPILEPTIC SYNDROMES	ICD-10 Diagnosis	G40.3
GENERALIZED IDIOPATHIC EPILEPSY AND EPILEPTIC SYNDROMES, NOT INTRACTABLE	ICD-10 Diagnosis	G40.30
GENERALIZED IDIOPATHIC EPILEPSY AND EPILEPTIC SYNDROMES, NOT INTRACTABLE, WITH STATUS EPILEPTICUS	ICD-10 Diagnosis	G40.301
GENERALIZED IDIOPATHIC EPILEPSY AND EPILEPTIC SYNDROMES, NOT INTRACTABLE, WITHOUT STATUS EPILEPTICUS	ICD-10 Diagnosis	G40.309
GENERALIZED IDIOPATHIC EPILEPSY AND EPILEPTIC SYNDROMES, INTRACTABLE	ICD-10 Diagnosis	G40.31
GENERALIZED IDIOPATHIC EPILEPSY AND EPILEPTIC SYNDROMES, INTRACTABLE, WITH STATUS EPILEPTICUS	ICD-10 Diagnosis	G40.311
GENERALIZED IDIOPATHIC EPILEPSY AND EPILEPTIC SYNDROMES, INTRACTABLE, WITHOUT STATUS EPILEPTICUS	ICD-10 Diagnosis	G40.319
OTHER GENERALIZED EPILEPSY AND EPILEPTIC SYNDROMES	ICD-10 Diagnosis	G40.4
OTHER GENERALIZED EPILEPSY AND EPILEPTIC SYNDROMES, NOT INTRACTABLE	ICD-10 Diagnosis	G40.40
OTHER GENERALIZED EPILEPSY AND EPILEPTIC SYNDROMES, NOT INTRACTABLE, WITH STATUS EPILEPTICUS	ICD-10 Diagnosis	G40.401
OTHER GENERALIZED EPILEPSY AND EPILEPTIC SYNDROMES, NOT INTRACTABLE, WITHOUT STATUS EPILEPTICUS	ICD-10 Diagnosis	G40.409
OTHER GENERALIZED EPILEPSY AND EPILEPTIC SYNDROMES, INTRACTABLE	ICD-10 Diagnosis	G40.41
OTHER GENERALIZED EPILEPSY AND EPILEPTIC SYNDROMES, INTRACTABLE, WITH STATUS EPILEPTICUS	ICD-10 Diagnosis	G40.411
OTHER GENERALIZED EPILEPSY AND EPILEPTIC SYNDROMES, INTRACTABLE, WITHOUT STATUS EPILEPTICUS	ICD-10 Diagnosis	G40.419
EPILEPTIC SEIZURES RELATED TO EXTERNAL CAUSES	ICD-10 Diagnosis	G40.5
EPILEPTIC SEIZURES RELATED TO EXTERNAL CAUSES, NOT INTRACTABLE	ICD-10 Diagnosis	G40.50
EPILEPTIC SEIZURES RELATED TO EXTERNAL CAUSES, NOT INTRACTABLE, WITH STATUS EPILEPTICUS	ICD-10 Diagnosis	G40.501
EPILEPTIC SEIZURES RELATED TO EXTERNAL CAUSES, NOT INTRACTABLE, WITHOUT STATUS EPILEPTICUS	ICD-10 Diagnosis	G40.509
OTHER EPILEPSY AND RECURRENT SEIZURES	ICD-10 Diagnosis	G40.8
OTHER EPILEPSY	ICD-10 Diagnosis	G40.80
OTHER EPILEPSY, NOT INTRACTABLE, WITH STATUS EPILEPTICUS	ICD-10 Diagnosis	G40.801
OTHER EPILEPSY, NOT INTRACTABLE, WITHOUT STATUS EPILEPTICUS	ICD-10 Diagnosis	G40.802
OTHER EPILEPSY, INTRACTABLE, WITH STATUS EPILEPTICUS	ICD-10 Diagnosis	G40.803
OTHER EPILEPSY, INTRACTABLE, WITHOUT STATUS EPILEPTICUS	ICD-10 Diagnosis	G40.804
LENNOX-GASTAUT SYNDROME	ICD-10 Diagnosis	G40.81
LENNOX-GASTAUT SYNDROME, NOT INTRACTABLE, WITH STATUS EPILEPTICUS	ICD-10 Diagnosis	G40.811
LENNOX-GASTAUT SYNDROME, NOT INTRACTABLE, WITHOUT STATUS EPILEPTICUS	ICD-10 Diagnosis	G40.812
LENNOX-GASTAUT SYNDROME, INTRACTABLE, WITH STATUS EPILEPTICUS	ICD-10 Diagnosis	G40.813
LENNOX-GASTAUT SYNDROME, INTRACTABLE, WITHOUT STATUS EPILEPTICUS	ICD-10 Diagnosis	G40.814
EPILEPTIC SPASMS	ICD-10 Diagnosis	G40.82
EPILEPTIC SPASMS, NOT INTRACTABLE, WITH STATUS EPILEPTICUS	ICD-10 Diagnosis	G40.821
EPILEPTIC SPASMS, NOT INTRACTABLE, WITHOUT STATUS EPILEPTICUS	ICD-10 Diagnosis	G40.822
EPILEPTIC SPASMS, INTRACTABLE, WITH STATUS EPILEPTICUS	ICD-10 Diagnosis	G40.823
EPILEPTIC SPASMS, INTRACTABLE, WITHOUT STATUS EPILEPTICUS	ICD-10 Diagnosis	G40.824
OTHER SEIZURES	ICD-10 Diagnosis	G40.89
EPILEPSY, UNSPECIFIED	ICD-10 Diagnosis	G40.9
EPILEPSY, UNSPECIFIED, NOT INTRACTABLE	ICD-10 Diagnosis	G40.90
EPILEPSY, UNSPECIFIED, NOT INTRACTABLE, WITH STATUS EPILEPTICUS	ICD-10 Diagnosis	G40.901
EPILEPSY, UNSPECIFIED, NOT INTRACTABLE, WITHOUT STATUS EPILEPTICUS	ICD-10 Diagnosis	G40.909
EPILEPSY, UNSPECIFIED, INTRACTABLE	ICD-10 Diagnosis	G40.91
EPILEPSY, UNSPECIFIED, INTRACTABLE, WITH STATUS EPILEPTICUS	ICD-10 Diagnosis	G40.911
EPILEPSY, UNSPECIFIED, INTRACTABLE, WITHOUT STATUS EPILEPTICUS	ICD-10 Diagnosis	G40.919
ABSENCE EPILEPTIC SYNDROME	ICD-10 Diagnosis	G40.A
ABSENCE EPILEPTIC SYNDROME, NOT INTRACTABLE	ICD-10 Diagnosis	G40.A0
ABSENCE EPILEPTIC SYNDROME, NOT INTRACTABLE, WITH STATUS EPILEPTICUS	ICD-10 Diagnosis	G40.A01
ABSENCE EPILEPTIC SYNDROME, NOT INTRACTABLE, WITHOUT STATUS EPILEPTICUS	ICD-10 Diagnosis	G40.A09
ABSENCE EPILEPTIC SYNDROME, INTRACTABLE	ICD-10 Diagnosis	G40.A1
ABSENCE EPILEPTIC SYNDROME, INTRACTABLE, WITH STATUS EPILEPTICUS	ICD-10 Diagnosis	G40.A11
ABSENCE EPILEPTIC SYNDROME, INTRACTABLE, WITHOUT STATUS EPILEPTICUS	ICD-10 Diagnosis	G40.A19
JUVENILE MYOCLONIC EPILEPSY [IMPULSIVE PETIT MAL]	ICD-10 Diagnosis	G40.B
JUVENILE MYOCLONIC EPILEPSY, NOT INTRACTABLE	ICD-10 Diagnosis	G40.B0
JUVENILE MYOCLONIC EPILEPSY, NOT INTRACTABLE, WITH STATUS EPILEPTICUS	ICD-10 Diagnosis	G40.B01
JUVENILE MYOCLONIC EPILEPSY, NOT INTRACTABLE, WITHOUT STATUS EPILEPTICUS	ICD-10 Diagnosis	G40.B09
JUVENILE MYOCLONIC EPILEPSY, INTRACTABLE	ICD-10 Diagnosis	G40.B1
JUVENILE MYOCLONIC EPILEPSY, INTRACTABLE, WITH STATUS EPILEPTICUS	ICD-10 Diagnosis	G40.B11
JUVENILE MYOCLONIC EPILEPSY, INTRACTABLE, WITHOUT STATUS EPILEPTICUS	ICD-10 Diagnosis	G40.B19
ECLAMPSIA	ICD-10 Diagnosis	O15
ECLAMPSIA COMPLICATING PREGNANCY	ICD-10 Diagnosis	O15.0
ECLAMPSIA COMPLICATING PREGNANCY, UNSPECIFIED TRIMESTER	ICD-10 Diagnosis	O15.00
ECLAMPSIA COMPLICATING PREGNANCY, SECOND TRIMESTER	ICD-10 Diagnosis	O15.02
ECLAMPSIA COMPLICATING PREGNANCY, THIRD TRIMESTER	ICD-10 Diagnosis	O15.03
ECLAMPSIA COMPLICATING LABOR	ICD-10 Diagnosis	O15.1
ECLAMPSIA COMPLICATING THE PUERPERIUM	ICD-10 Diagnosis	O15.2
ECLAMPSIA, UNSPECIFIED AS TO TIME PERIOD	ICD-10 Diagnosis	O15.9
CONVULSIONS, NOT ELSEWHERE CLASSIFIED	ICD-10 Diagnosis	R56
FEBRILE CONVULSIONS	ICD-10 Diagnosis	R56.0
SIMPLE FEBRILE CONVULSIONS	ICD-10 Diagnosis	R56.00
COMPLEX FEBRILE CONVULSIONS	ICD-10 Diagnosis	R56.01
POST TRAUMATIC SEIZURES	ICD-10 Diagnosis	R56.1
UNSPECIFIED CONVULSIONS	ICD-10 Diagnosis	R56.9
EPILEPSY AND RECURRENT SEIZURES	ICD-9 Diagnosis	345
GENERALIZED NONCONVULSIVE EPILEPSY	ICD-9 Diagnosis	345.0
GENERALIZED NONCONVULSIVE EPILEPSY, WITHOUT MENTION OF INTRACTABLE EPILEPSY	ICD-9 Diagnosis	345.00
GENERALIZED NONCONVULSIVE EPILEPSY, WITH INTRACTABLE EPILEPSY	ICD-9 Diagnosis	345.01
GENERALIZED CONVULSIVE EPILEPSY	ICD-9 Diagnosis	345.1
GENERALIZED CONVULSIVE EPILEPSY, WITHOUT MENTION OF INTRACTABLE EPILEPSY	ICD-9 Diagnosis	345.10
GENERALIZED CONVULSIVE EPILEPSY, WITH INTRACTABLE EPILEPSY	ICD-9 Diagnosis	345.11
PETIT MAL STATUS, EPILEPTIC	ICD-9 Diagnosis	345.2
GRAND MAL STATUS, EPILEPTIC	ICD-9 Diagnosis	345.3
LOCALIZATION-RELATED (FOCAL) (PARTIAL) EPILEPSY AND EPILEPTIC SYNDROMES WITH COMPLEX PARTIAL SEIZURES	ICD-9 Diagnosis	345.4
LOCALIZATION-RELATED (FOCAL) (PARTIAL) EPILEPSY AND EPILEPTIC SYNDROMES WITH COMPLEX PARTIAL SEIZURES, WITHOUT MENTION OF INTRACTABLE EPILEPSY	ICD-9 Diagnosis	345.40
LOCALIZATION-RELATED (FOCAL) (PARTIAL) EPILEPSY AND EPILEPTIC SYNDROMES WITH COMPLEX PARTIAL SEIZURES, WITH INTRACTABLE EPILEPSY	ICD-9 Diagnosis	345.41
LOCALIZATION-RELATED (FOCAL) (PARTIAL) EPILEPSY AND EPILEPTIC SYNDROMES WITH SIMPLE PARTIAL SEIZURES	ICD-9 Diagnosis	345.5
LOCALIZATION-RELATED (FOCAL) (PARTIAL) EPILEPSY AND EPILEPTIC SYNDROMES WITH SIMPLE PARTIAL SEIZURES, WITHOUT MENTION OF INTRACTABLE EPILEPSY	ICD-9 Diagnosis	345.50
LOCALIZATION-RELATED (FOCAL) (PARTIAL) EPILEPSY AND EPILEPTIC SYNDROMES WITH SIMPLE PARTIAL SEIZURES, WITH INTRACTABLE EPILEPSY	ICD-9 Diagnosis	345.51
INFANTILE SPASMS	ICD-9 Diagnosis	345.6
INFANTILE SPASMS, WITHOUT MENTION OF INTRACTABLE EPILEPSY	ICD-9 Diagnosis	345.60
INFANTILE SPASMS, WITH INTRACTABLE EPILEPSY	ICD-9 Diagnosis	345.61
EPILEPSIA PARTIALIS CONTINUA	ICD-9 Diagnosis	345.7
EPILEPSIA PARTIALIS CONTINUA, WITHOUT MENTION OF INTRACTABLE EPILEPSY	ICD-9 Diagnosis	345.70
EPILEPSIA PARTIALIS CONTINUA, WITH INTRACTABLE EPILEPSY	ICD-9 Diagnosis	345.71
OTHER FORMS OF EPILEPSY AND RECURRENT SEIZURES	ICD-9 Diagnosis	345.8
OTHER FORMS OF EPILEPSY AND RECURRENT SEIZURES, WITHOUT MENTION OF INTRACTABLE EPILEPSY	ICD-9 Diagnosis	345.80
OTHER FORMS OF EPILEPSY AND RECURRENT SEIZURES, WITH INTRACTABLE EPILEPSY	ICD-9 Diagnosis	345.81
EPILEPSY, UNSPECIFIED	ICD-9 Diagnosis	345.9
EPILEPSY, UNSPECIFIED, WITHOUT MENTION OF INTRACTABLE EPILEPSY	ICD-9 Diagnosis	345.90
EPILEPSY, UNSPECIFIED, WITH INTRACTABLE EPILEPSY	ICD-9 Diagnosis	345.91
ECLAMPSIA COMPLICATING PREGNANCY, CHILDBIRTH OR THE PUERPERIUM	ICD-9 Diagnosis	642.6
ECLAMPSIA, UNSPECIFIED AS TO EPISODE OF CARE OR NOT APPLICABLE	ICD-9 Diagnosis	642.60
ECLAMPSIA, DELIVERED, WITH OR WITHOUT MENTION OF ANTEPARTUM CONDITION	ICD-9 Diagnosis	642.61
ECLAMPSIA, WITH DELIVERY, WITH MENTION OF POSTPARTUM COMPLICATION	ICD-9 Diagnosis	642.62
ECLAMPSIA, ANTEPARTUM CONDITION OR COMPLICATION	ICD-9 Diagnosis	642.63
ECLAMPSIA, POSTPARTUM CONDITION OR COMPLICATION	ICD-9 Diagnosis	642.64
CONVULSIONS	ICD-9 Diagnosis	780.3
FEBRILE CONVULSIONS (SIMPLE), UNSPECIFIED	ICD-9 Diagnosis	780.31
COMPLEX FEBRILE CONVULSIONS	ICD-9 Diagnosis	780.32
POST TRAUMATIC SEIZURES	ICD-9 Diagnosis	780.33
OTHER CONVULSIONS	ICD-9 Diagnosis	780.39
NEUTROPENIA
CONGENITAL AGRANULOCYTOSIS	ICD-10 Diagnosis	D70.0
AGRANULOCYTOSIS SECONDARY TO CANCER CHEMOTHERAPY	ICD-10 Diagnosis	D70.1
OTHER DRUG-INDUCED AGRANULOCYTOSIS	ICD-10 Diagnosis	D70.2
NEUTROPENIA DUE TO INFECTION	ICD-10 Diagnosis	D70.3
CYCLIC NEUTROPENIA	ICD-10 Diagnosis	D70.4
OTHER NEUTROPENIA	ICD-10 Diagnosis	D70.8
NEUTROPENIA, UNSPECIFIED	ICD-10 Diagnosis	D70.9
NEUTROPENIA, UNSPECIFIED	ICD-9 Diagnosis	288.00
CONGENITAL NEUTROPENIA	ICD-9 Diagnosis	288.01
CYCLIC NEUTROPENIA	ICD-9 Diagnosis	288.02
DRUG INDUCED NEUTROPENIA	ICD-9 Diagnosis	288.03
NEUTROPENIA DUE TO INFECTION	ICD-9 Diagnosis	288.04
OTHER NEUTROPENIA	ICD-9 Diagnosis	288.09
RENAL FAILURE/DIALYSIS
TRANSPLANTATION MEDICINE (KIDNEY ALLOGRAFT REJECTION), MICROARRAY GENE EXPRESSION PROFILING OF 1494 GENES, UTILIZING TRANSPLANT BIOPSY TISSUE, ALGORITHM REPORTED AS A PROBABILITY SCORE FOR REJECTION	CPT	0088U
TRANSPLANTATION OF RIGHT KIDNEY, ALLOGENEIC, OPEN APPROACH	ICD-10 Procedure	0TY00Z0
TRANSPLANTATION OF RIGHT KIDNEY, SYNGENEIC, OPEN APPROACH	ICD-10 Procedure	0TY00Z1
TRANSPLANTATION OF RIGHT KIDNEY, ZOOPLASTIC, OPEN APPROACH	ICD-10 Procedure	0TY00Z2
TRANSPLANTATION OF LEFT KIDNEY, ALLOGENEIC, OPEN APPROACH	ICD-10 Procedure	0TY10Z0
TRANSPLANTATION OF LEFT KIDNEY, SYNGENEIC, OPEN APPROACH	ICD-10 Procedure	0TY10Z1
TRANSPLANTATION OF LEFT KIDNEY, ZOOPLASTIC, OPEN APPROACH	ICD-10 Procedure	0TY10Z2
INSERTION OF CANNULA FOR HEMODIALYSIS, OTHER PURPOSE (SEPARATE PROCEDURE); VEIN TO VEIN	CPT	36800
INSERTION OF CANNULA FOR HEMODIALYSIS, OTHER PURPOSE (SEPARATE PROCEDURE); ARTERIOVENOUS, EXTERNAL REVISION, OR CLOSURE	CPT	36815
DISTAL REVASCULARIZATION AND INTERVAL LIGATION (DRIL), UPPER EXTREMITY HEMODIALYSIS ACCESS (STEAL SYNDROME)	CPT	36838
VENOUS CATHETERIZATION FOR RENAL DIALYSIS	ICD-9 Procedure	38.95
ARTERIOVENOSTOMY FOR RENAL DIALYSIS	ICD-9 Procedure	39.27
REVISION OF ARTERIOVENOUS SHUNT FOR RENAL DIALYSIS	ICD-9 Procedure	39.42
REMOVAL OF ARTERIOVENOUS SHUNT FOR RENAL DIALYSIS	ICD-9 Procedure	39.43
HEMODIALYSIS	ICD-9 Procedure	39.95
IRRIGATION OF PERITONEAL CAVITY USING DIALYSATE, PERCUTANEOUS APPROACH	ICD-10 Procedure	3E1M39Z
HYPERTENSIVE CHRONIC KIDNEY DISEASE	ICD-9 Diagnosis	403
HYPERTENSIVE CHRONIC KIDNEY DISEASE, MALIGNANT	ICD-9 Diagnosis	403.0
HYPERTENSIVE CHRONIC KIDNEY DISEASE, MALIGNANT, WITH CHRONIC KIDNEY DISEASE STAGE I THROUGH STAGE IV, OR UNSPECIFIED	ICD-9 Diagnosis	403.00
HYPERTENSIVE CHRONIC KIDNEY DISEASE, MALIGNANT, WITH CHRONIC KIDNEY DISEASE STAGE V OR END STAGE RENAL DISEASE	ICD-9 Diagnosis	403.01
HYPERTENSIVE CHRONIC KIDNEY DISEASE, BENIGN	ICD-9 Diagnosis	403.1
HYPERTENSIVE CHRONIC KIDNEY DISEASE, BENIGN, WITH CHRONIC KIDNEY DISEASE STAGE I THROUGH STAGE IV, OR UNSPECIFIED	ICD-9 Diagnosis	403.10
HYPERTENSIVE CHRONIC KIDNEY DISEASE, BENIGN, WITH CHRONIC KIDNEY DISEASE STAGE V OR END STAGE RENAL DISEASE	ICD-9 Diagnosis	403.11
HYPERTENSIVE CHRONIC KIDNEY DISEASE, UNSPECIFIED	ICD-9 Diagnosis	403.9
HYPERTENSIVE CHRONIC KIDNEY DISEASE, UNSPECIFIED, WITH CHRONIC KIDNEY DISEASE STAGE I THROUGH STAGE IV, OR UNSPECIFIED	ICD-9 Diagnosis	403.90
HYPERTENSIVE CHRONIC KIDNEY DISEASE, UNSPECIFIED, WITH CHRONIC KIDNEY DISEASE STAGE V OR END STAGE RENAL DISEASE	ICD-9 Diagnosis	403.91
HYPERTENSIVE HEART AND CHRONIC KIDNEY DISEASE	ICD-9 Diagnosis	404
HYPERTENSIVE HEART AND CHRONIC KIDNEY DISEASE, MALIGNANT	ICD-9 Diagnosis	404.0
HYPERTENSIVE HEART AND CHRONIC KIDNEY DISEASE, MALIGNANT, WITHOUT HEART FAILURE AND WITH CHRONIC KIDNEY DISEASE STAGE I THROUGH STAGE IV, OR UNSPECIFIED	ICD-9 Diagnosis	404.00
HYPERTENSIVE HEART AND CHRONIC KIDNEY DISEASE, MALIGNANT, WITH HEART FAILURE AND WITH CHRONIC KIDNEY DISEASE STAGE I THROUGH STAGE IV, OR UNSPECIFIED	ICD-9 Diagnosis	404.01
HYPERTENSIVE HEART AND CHRONIC KIDNEY DISEASE, MALIGNANT, WITHOUT HEART FAILURE AND WITH CHRONIC KIDNEY DISEASE STAGE V OR END STAGE RENAL DISEASE	ICD-9 Diagnosis	404.02
HYPERTENSIVE HEART AND CHRONIC KIDNEY DISEASE, MALIGNANT, WITH HEART FAILURE AND WITH CHRONIC KIDNEY DISEASE STAGE V OR END STAGE RENAL DISEASE	ICD-9 Diagnosis	404.03
HYPERTENSIVE HEART AND CHRONIC KIDNEY DISEASE, BENIGN	ICD-9 Diagnosis	404.1
HYPERTENSIVE HEART AND CHRONIC KIDNEY DISEASE, BENIGN, WITHOUT HEART FAILURE AND WITH CHRONIC KIDNEY DISEASE STAGE I THROUGH STAGE IV, OR UNSPECIFIED	ICD-9 Diagnosis	404.10
HYPERTENSIVE HEART AND CHRONIC KIDNEY DISEASE, BENIGN, WITH HEART FAILURE AND WITH CHRONIC KIDNEY DISEASE STAGE I THROUGH STAGE IV, OR UNSPECIFIED	ICD-9 Diagnosis	404.11
HYPERTENSIVE HEART AND CHRONIC KIDNEY DISEASE, BENIGN, WITHOUT HEART FAILURE AND WITH CHRONIC KIDNEY DISEASE STAGE V OR END STAGE RENAL DISEASE	ICD-9 Diagnosis	404.12
HYPERTENSIVE HEART AND CHRONIC KIDNEY DISEASE, BENIGN, WITH HEART FAILURE AND CHRONIC KIDNEY DISEASE STAGE V OR END STAGE RENAL DISEASE	ICD-9 Diagnosis	404.13
HYPERTENSIVE HEART AND CHRONIC KIDNEY DISEASE, UNSPECIFIED	ICD-9 Diagnosis	404.9
HYPERTENSIVE HEART AND CHRONIC KIDNEY DISEASE, UNSPECIFIED, WITHOUT HEART FAILURE AND WITH CHRONIC KIDNEY DISEASE STAGE I THROUGH STAGE IV, OR UNSPECIFIED	ICD-9 Diagnosis	404.90
HYPERTENSIVE HEART AND CHRONIC KIDNEY DISEASE, UNSPECIFIED, WITH HEART FAILURE AND WITH CHRONIC KIDNEY DISEASE STAGE I THROUGH STAGE IV, OR UNSPECIFIED	ICD-9 Diagnosis	404.91
HYPERTENSIVE HEART AND CHRONIC KIDNEY DISEASE, UNSPECIFIED, WITHOUT HEART FAILURE AND WITH CHRONIC KIDNEY DISEASE STAGE V OR END STAGE RENAL DISEASE	ICD-9 Diagnosis	404.92
HYPERTENSIVE HEART AND CHRONIC KIDNEY DISEASE, UNSPECIFIED, WITH HEART FAILURE AND CHRONIC KIDNEY DISEASE STAGE V OR END STAGE RENAL DISEASE	ICD-9 Diagnosis	404.93
RECIPIENT NEPHRECTOMY (SEPARATE PROCEDURE)	CPT	50340
RENAL ALLOTRANSPLANTATION, IMPLANTATION OF GRAFT; WITHOUT RECIPIENT NEPHRECTOMY	CPT	50360
RENAL ALLOTRANSPLANTATION, IMPLANTATION OF GRAFT; WITH RECIPIENT NEPHRECTOMY	CPT	50365
REMOVAL OF TRANSPLANTED RENAL ALLOGRAFT	CPT	50370
RENAL AUTOTRANSPLANTATION, REIMPLANTATION OF KIDNEY	CPT	50380
PERITONEAL DIALYSIS	ICD-9 Procedure	54.98
REMOVAL OF TRANSPLANTED OR REJECTED KIDNEY	ICD-9 Procedure	55.53
OTHER KIDNEY TRANSPLANTATION	ICD-9 Procedure	55.69
IMPLANTATION OR REPLACEMENT OF MECHANICAL KIDNEY	ICD-9 Procedure	55.97
REMOVAL OF MECHANICAL KIDNEY	ICD-9 Procedure	55.98
ACUTE KIDNEY FAILURE	ICD-9 Diagnosis	584
ACUTE KIDNEY FAILURE WITH LESION OF TUBULAR NECROSIS	ICD-9 Diagnosis	584.5
ACUTE KIDNEY FAILURE WITH LESION OF RENAL CORTICAL NECROSIS	ICD-9 Diagnosis	584.6
ACUTE KIDNEY FAILURE WITH LESION OF RENAL MEDULLARY (PAPILLARY) NECROSIS	ICD-9 Diagnosis	584.7
ACUTE KIDNEY FAILURE WITH OTHER SPECIFIED PATHOLOGICAL LESION IN KIDNEY	ICD-9 Diagnosis	584.8
ACUTE KIDNEY FAILURE, UNSPECIFIED	ICD-9 Diagnosis	584.9
CHRONIC KIDNEY DISEASE (CKD)	ICD-9 Diagnosis	585
CHRONIC KIDNEY DISEASE, STAGE I	ICD-9 Diagnosis	585.1
CHRONIC KIDNEY DISEASE, STAGE II (MILD)	ICD-9 Diagnosis	585.2
CHRONIC KIDNEY DISEASE, STAGE III (MODERATE)	ICD-9 Diagnosis	585.3
CHRONIC KIDNEY DISEASE, STAGE IV (SEVERE)	ICD-9 Diagnosis	585.4
CHRONIC KIDNEY DISEASE, STAGE V	ICD-9 Diagnosis	585.5
END STAGE RENAL DISEASE	ICD-9 Diagnosis	585.6
CHRONIC KIDNEY DISEASE, UNSPECIFIED	ICD-9 Diagnosis	585.9
RENAL FAILURE, UNSPECIFIED	ICD-9 Diagnosis	586
PERFORMANCE OF URINARY FILTRATION, SINGLE	ICD-10 Procedure	5A1D00Z
PERFORMANCE OF URINARY FILTRATION, MULTIPLE	ICD-10 Procedure	5A1D60Z
PERFORMANCE OF URINARY FILTRATION, INTERMITTENT, LESS THAN 6 HOURS PER DAY	ICD-10 Procedure	5A1D70Z
PERFORMANCE OF URINARY FILTRATION, PROLONGED INTERMITTENT, 6-18 HOURS PER DAY	ICD-10 Procedure	5A1D80Z
PERFORMANCE OF URINARY FILTRATION, CONTINUOUS, GREATER THAN 18 HOURS PER DAY	ICD-10 Procedure	5A1D90Z
END-STAGE RENAL DISEASE (ESRD) RELATED SERVICES PER FULL MONTH; FOR PATIENTS YOUNGER THAN TWO YEARS OF AGE TO INCLUDE MONITORING FOR THE ADEQUACY OF NUTRITION, ASSESSMENT OF GROWTH AND DEVELOPMENT, AND COUNSELING OF PARENTS	CPT	90918
END-STAGE RENAL DISEASE (ESRD) RELATED SERVICES PER FULL MONTH; FOR PATIENTS BETWEEN TWO AND ELEVEN YEARS OF AGE TO INCLUDE MONITORING FOR THE ADEQUACY OF NUTRITION, ASSESSMENT OF GROWTH AND DEVELOPMENT, AND COUNSELING OF PARENTS	CPT	90919
END-STAGE RENAL DISEASE (ESRD) RELATED SERVICES PER FULL MONTH; FOR PATIENTS BETWEEN TWELVE AND NINETEEN YEARS OF AGE TO INCLUDE MONITORING FOR THE ADEQUACY OF NUTRITION, ASSESSMENT OF GROWTH AND DEVELOPMENT, AND COUNSELING OF PARENTS	CPT	90920
END-STAGE RENAL DISEASE (ESRD) RELATED SERVICES PER FULL MONTH; FOR PATIENTS TWENTY YEARS OF AGE AND OLDER	CPT	90921
END-STAGE RENAL DISEASE (ESRD) RELATED SERVICES (LESS THAN FULL MONTH), PER DAY; FOR PATIENTS YOUNGER THAN TWO YEARS OF AGE	CPT	90922
END-STAGE RENAL DISEASE (ESRD) RELATED SERVICES (LESS THAN FULL MONTH), PER DAY; FOR PATIENTS BETWEEN TWO AND ELEVEN YEARS OF AGE	CPT	90923
END-STAGE RENAL DISEASE (ESRD) RELATED SERVICES (LESS THAN FULL MONTH), PER DAY; FOR PATIENTS BETWEEN TWELVE AND NINETEEN YEARS OF AGE	CPT	90924
END-STAGE RENAL DISEASE (ESRD) RELATED SERVICES (LESS THAN FULL MONTH), PER DAY; FOR PATIENTS TWENTY YEARS OF AGE AND OLDER	CPT	90925
HEMODIALYSIS PROCEDURE WITH SINGLE EVALUATION BY A PHYSICIAN OR OTHER QUALIFIED HEALTH CARE PROFESSIONAL	CPT	90935
HEMODIALYSIS PROCEDURE REQUIRING REPEATED EVALUATION(S) WITH OR WITHOUT SUBSTANTIAL REVISION OF DIALYSIS PRESCRIPTION	CPT	90937
HEMODIALYSIS ACCESS FLOW STUDY TO DETERMINE BLOOD FLOW IN GRAFTS AND ARTERIOVENOUS FISTULAE BY AN INDICATOR DILUTION METHOD, HOOK-UP; TRANSCUTANEOUS MEASUREMENT AND DISCONNECTION	CPT	90939
HEMODIALYSIS ACCESS FLOW STUDY TO DETERMINE BLOOD FLOW IN GRAFTS AND ARTERIOVENOUS FISTULAE BY AN INDICATOR METHOD	CPT	90940
DIALYSIS PROCEDURE OTHER THAN HEMODIALYSIS (EG, PERITONEAL DIALYSIS, HEMOFILTRATION, OR OTHER CONTINUOUS RENAL REPLACEMENT THERAPIES), WITH SINGLE EVALUATION BY A PHYSICIAN OR OTHER QUALIFIED HEALTH CARE PROFESSIONAL	CPT	90945
DIALYSIS PROCEDURE OTHER THAN HEMODIALYSIS (EG, PERITONEAL DIALYSIS, HEMOFILTRATION, OR OTHER CONTINUOUS RENAL REPLACEMENT THERAPIES) REQUIRING REPEATED EVALUATIONS BY A PHYSICIAN OR OTHER QUALIFIED HEALTH CARE PROFESSIONAL, WITH OR WITHOUT SUBSTANTIAL REVISION OF DIALYSIS PRESCRIPTION	CPT	90947
END-STAGE RENAL DISEASE (ESRD) RELATED SERVICES MONTHLY, FOR PATIENTS YOUNGER THAN 2 YEARS OF AGE TO INCLUDE MONITORING FOR THE ADEQUACY OF NUTRITION, ASSESSMENT OF GROWTH AND DEVELOPMENT, AND COUNSELING OF PARENTS; WITH 4 OR MORE FACE-TO-FACE VISITS BY A PHYSICIAN OR OTHER QUALIFIED HEALTH CARE PROFESSIONAL PER MONTH	CPT	90951
END-STAGE RENAL DISEASE (ESRD) RELATED SERVICES MONTHLY, FOR PATIENTS YOUNGER THAN 2 YEARS OF AGE TO INCLUDE MONITORING FOR THE ADEQUACY OF NUTRITION, ASSESSMENT OF GROWTH AND DEVELOPMENT, AND COUNSELING OF PARENTS; WITH 2-3 FACE-TO-FACE VISITS BY A PHYSICIAN OR OTHER QUALIFIED HEALTH CARE PROFESSIONAL PER MONTH	CPT	90952
END-STAGE RENAL DISEASE (ESRD) RELATED SERVICES MONTHLY, FOR PATIENTS YOUNGER THAN 2 YEARS OF AGE TO INCLUDE MONITORING FOR THE ADEQUACY OF NUTRITION, ASSESSMENT OF GROWTH AND DEVELOPMENT, AND COUNSELING OF PARENTS; WITH 1 FACE-TO-FACE VISIT BY A PHYSICIAN OR OTHER QUALIFIED HEALTH CARE PROFESSIONAL PER MONTH	CPT	90953
END-STAGE RENAL DISEASE (ESRD) RELATED SERVICES MONTHLY, FOR PATIENTS 2-11 YEARS OF AGE TO INCLUDE MONITORING FOR THE ADEQUACY OF NUTRITION, ASSESSMENT OF GROWTH AND DEVELOPMENT, AND COUNSELING OF PARENTS; WITH 4 OR MORE FACE-TO-FACE VISITS BY A PHYSICIAN OR OTHER QUALIFIED HEALTH CARE PROFESSIONAL PER MONTH	CPT	90954
END-STAGE RENAL DISEASE (ESRD) RELATED SERVICES MONTHLY, FOR PATIENTS 2-11 YEARS OF AGE TO INCLUDE MONITORING FOR THE ADEQUACY OF NUTRITION, ASSESSMENT OF GROWTH AND DEVELOPMENT, AND COUNSELING OF PARENTS; WITH 2-3 FACE-TO-FACE VISITS BY A PHYSICIAN OR OTHER QUALIFIED HEALTH CARE PROFESSIONAL PER MONTH	CPT	90955
END-STAGE RENAL DISEASE (ESRD) RELATED SERVICES MONTHLY, FOR PATIENTS 2-11 YEARS OF AGE TO INCLUDE MONITORING FOR THE ADEQUACY OF NUTRITION, ASSESSMENT OF GROWTH AND DEVELOPMENT, AND COUNSELING OF PARENTS; WITH 1 FACE-TO-FACE VISIT BY A PHYSICIAN OR OTHER QUALIFIED HEALTH CARE PROFESSIONAL PER MONTH	CPT	90956
END-STAGE RENAL DISEASE (ESRD) RELATED SERVICES MONTHLY, FOR PATIENTS 12-19 YEARS OF AGE TO INCLUDE MONITORING FOR THE ADEQUACY OF NUTRITION, ASSESSMENT OF GROWTH AND DEVELOPMENT, AND COUNSELING OF PARENTS; WITH 4 OR MORE FACE-TO-FACE VISITS BY A PHYSICIAN OR OTHER QUALIFIED HEALTH CARE PROFESSIONAL PER MONTH	CPT	90957
END-STAGE RENAL DISEASE (ESRD) RELATED SERVICES MONTHLY, FOR PATIENTS 12-19 YEARS OF AGE TO INCLUDE MONITORING FOR THE ADEQUACY OF NUTRITION, ASSESSMENT OF GROWTH AND DEVELOPMENT, AND COUNSELING OF PARENTS; WITH 2-3 FACE-TO-FACE VISITS BY A PHYSICIAN OR OTHER QUALIFIED HEALTH CARE PROFESSIONAL PER MONTH	CPT	90958
END-STAGE RENAL DISEASE (ESRD) RELATED SERVICES MONTHLY, FOR PATIENTS 12-19 YEARS OF AGE TO INCLUDE MONITORING FOR THE ADEQUACY OF NUTRITION, ASSESSMENT OF GROWTH AND DEVELOPMENT, AND COUNSELING OF PARENTS; WITH 1 FACE-TO-FACE VISIT BY A PHYSICIAN OR OTHER QUALIFIED HEALTH CARE PROFESSIONAL PER MONTH	CPT	90959
END-STAGE RENAL DISEASE (ESRD) RELATED SERVICES MONTHLY, FOR PATIENTS 20 YEARS OF AGE AND OLDER; WITH 4 OR MORE FACE-TO-FACE VISITS BY A PHYSICIAN OR OTHER QUALIFIED HEALTH CARE PROFESSIONAL PER MONTH	CPT	90960
END-STAGE RENAL DISEASE (ESRD) RELATED SERVICES MONTHLY, FOR PATIENTS 20 YEARS OF AGE AND OLDER; WITH 2-3 FACE-TO-FACE VISITS BY A PHYSICIAN OR OTHER QUALIFIED HEALTH CARE PROFESSIONAL PER MONTH	CPT	90961
END-STAGE RENAL DISEASE (ESRD) RELATED SERVICES MONTHLY, FOR PATIENTS 20 YEARS OF AGE AND OLDER; WITH 1 FACE-TO-FACE VISIT BY A PHYSICIAN OR OTHER QUALIFIED HEALTH CARE PROFESSIONAL PER MONTH	CPT	90962
END-STAGE RENAL DISEASE (ESRD) RELATED SERVICES FOR HOME DIALYSIS PER FULL MONTH, FOR PATIENTS YOUNGER THAN 2 YEARS OF AGE TO INCLUDE MONITORING FOR THE ADEQUACY OF NUTRITION, ASSESSMENT OF GROWTH AND DEVELOPMENT, AND COUNSELING OF PARENTS	CPT	90963
END-STAGE RENAL DISEASE (ESRD) RELATED SERVICES FOR HOME DIALYSIS PER FULL MONTH, FOR PATIENTS 2-11 YEARS OF AGE TO INCLUDE MONITORING FOR THE ADEQUACY OF NUTRITION, ASSESSMENT OF GROWTH AND DEVELOPMENT, AND COUNSELING OF PARENTS	CPT	90964
END-STAGE RENAL DISEASE (ESRD) RELATED SERVICES FOR HOME DIALYSIS PER FULL MONTH, FOR PATIENTS 12-19 YEARS OF AGE TO INCLUDE MONITORING FOR THE ADEQUACY OF NUTRITION, ASSESSMENT OF GROWTH AND DEVELOPMENT, AND COUNSELING OF PARENTS	CPT	90965
END-STAGE RENAL DISEASE (ESRD) RELATED SERVICES FOR HOME DIALYSIS PER FULL MONTH, FOR PATIENTS 20 YEARS OF AGE AND OLDER	CPT	90966
END-STAGE RENAL DISEASE (ESRD) RELATED SERVICES FOR DIALYSIS LESS THAN A FULL MONTH OF SERVICE, PER DAY; FOR PATIENTS YOUNGER THAN 2 YEARS OF AGE	CPT	90967
END-STAGE RENAL DISEASE (ESRD) RELATED SERVICES FOR DIALYSIS LESS THAN A FULL MONTH OF SERVICE, PER DAY; FOR PATIENTS 2-11 YEARS OF AGE	CPT	90968
END-STAGE RENAL DISEASE (ESRD) RELATED SERVICES FOR DIALYSIS LESS THAN A FULL MONTH OF SERVICE, PER DAY; FOR PATIENTS 12-19 YEARS OF AGE	CPT	90969
END-STAGE RENAL DISEASE (ESRD) RELATED SERVICES FOR DIALYSIS LESS THAN A FULL MONTH OF SERVICE, PER DAY; FOR PATIENTS 20 YEARS OF AGE AND OLDER	CPT	90970
DIALYSIS TRAINING, PATIENT, INCLUDING HELPER WHERE APPLICABLE, ANY MODE, COMPLETED COURSE	CPT	90989
DIALYSIS TRAINING, PATIENT, INCLUDING HELPER WHERE APPLICABLE, ANY MODE, COURSE NOT COMPLETED, PER TRAINING SESSION	CPT	90993
HEMOPERFUSION (EG, WITH ACTIVATED CHARCOAL OR RESIN)	CPT	90997
UNLISTED DIALYSIS PROCEDURE, INPATIENT OR OUTPATIENT	CPT	90999
CATHETER, HEMODIALYSIS/PERITONEAL, LONG-TERM	HCPCS	C1750
CATHETER, HEMODIALYSIS/PERITONEAL, SHORT-TERM	HCPCS	C1752
HYPERTENSIVE CHRONIC KIDNEY DISEASE	ICD-10 Diagnosis	I12
HYPERTENSIVE CHRONIC KIDNEY DISEASE WITH STAGE 5 CHRONIC KIDNEY DISEASE OR END STAGE RENAL DISEASE	ICD-10 Diagnosis	I12.0
HYPERTENSIVE CHRONIC KIDNEY DISEASE WITH STAGE 1 THROUGH STAGE 4 CHRONIC KIDNEY DISEASE, OR UNSPECIFIED CHRONIC KIDNEY DISEASE	ICD-10 Diagnosis	I12.9
HYPERTENSIVE HEART AND CHRONIC KIDNEY DISEASE	ICD-10 Diagnosis	I13
HYPERTENSIVE HEART AND CHRONIC KIDNEY DISEASE WITH HEART FAILURE AND STAGE 1 THROUGH STAGE 4 CHRONIC KIDNEY DISEASE, OR UNSPECIFIED CHRONIC KIDNEY DISEASE	ICD-10 Diagnosis	I13.0
HYPERTENSIVE HEART AND CHRONIC KIDNEY DISEASE WITHOUT HEART FAILURE	ICD-10 Diagnosis	I13.1
HYPERTENSIVE HEART AND CHRONIC KIDNEY DISEASE WITHOUT HEART FAILURE, WITH STAGE 1 THROUGH STAGE 4 CHRONIC KIDNEY DISEASE, OR UNSPECIFIED CHRONIC KIDNEY DISEASE	ICD-10 Diagnosis	I13.10
HYPERTENSIVE HEART AND CHRONIC KIDNEY DISEASE WITHOUT HEART FAILURE, WITH STAGE 5 CHRONIC KIDNEY DISEASE, OR END STAGE RENAL DISEASE	ICD-10 Diagnosis	I13.11
HYPERTENSIVE HEART AND CHRONIC KIDNEY DISEASE WITH HEART FAILURE AND WITH STAGE 5 CHRONIC KIDNEY DISEASE, OR END STAGE RENAL DISEASE	ICD-10 Diagnosis	I13.2
UNCLASSIFIED DRUG OR BIOLOGICAL USED FOR ESRD ON DIALYSIS	HCPCS	J3591
ACUTE KIDNEY FAILURE	ICD-10 Diagnosis	N17
ACUTE KIDNEY FAILURE WITH TUBULAR NECROSIS	ICD-10 Diagnosis	N17.0
ACUTE KIDNEY FAILURE WITH ACUTE CORTICAL NECROSIS	ICD-10 Diagnosis	N17.1
ACUTE KIDNEY FAILURE WITH MEDULLARY NECROSIS	ICD-10 Diagnosis	N17.2
OTHER ACUTE KIDNEY FAILURE	ICD-10 Diagnosis	N17.8
ACUTE KIDNEY FAILURE, UNSPECIFIED	ICD-10 Diagnosis	N17.9
CHRONIC KIDNEY DISEASE (CKD)	ICD-10 Diagnosis	N18
CHRONIC KIDNEY DISEASE, STAGE 1	ICD-10 Diagnosis	N18.1
CHRONIC KIDNEY DISEASE, STAGE 2 (MILD)	ICD-10 Diagnosis	N18.2
CHRONIC KIDNEY DISEASE, STAGE 3 (MODERATE)	ICD-10 Diagnosis	N18.3
CHRONIC KIDNEY DISEASE, STAGE 3 UNSPECIFIED	ICD-10 Diagnosis	N18.30
CHRONIC KIDNEY DISEASE, STAGE 3A	ICD-10 Diagnosis	N18.31
CHRONIC KIDNEY DISEASE, STAGE 3B	ICD-10 Diagnosis	N18.32
CHRONIC KIDNEY DISEASE, STAGE 4 (SEVERE)	ICD-10 Diagnosis	N18.4
CHRONIC KIDNEY DISEASE, STAGE 5	ICD-10 Diagnosis	N18.5
END STAGE RENAL DISEASE	ICD-10 Diagnosis	N18.6
CHRONIC KIDNEY DISEASE, UNSPECIFIED	ICD-10 Diagnosis	N18.9
UNSPECIFIED KIDNEY FAILURE	ICD-10 Diagnosis	N19
SIMULTANEOUS PANCREAS KIDNEY TRANSPLANTATION	HCPCS	S2065
KIDNEY REPLACED BY TRANSPLANT	ICD-9 Diagnosis	V42.0
RENAL DIALYSIS STATUS	ICD-9 Diagnosis	V45.11
NONCOMPLIANCE WITH RENAL DIALYSIS	ICD-9 Diagnosis	V45.12
ENCOUNTER FOR DIALYSIS AND DIALYSIS CATHETER CARE	ICD-9 Diagnosis	V56
AFTERCARE INVOLVING EXTRACORPOREAL DIALYSIS	ICD-9 Diagnosis	V56.0
FITTING AND ADJUSTMENT OF EXTRACORPOREAL DIALYSIS CATHETER	ICD-9 Diagnosis	V56.1
FITTING AND ADJUSTMENT OF PERITONEAL DIALYSIS CATHETER	ICD-9 Diagnosis	V56.2
ENCOUNTER FOR ADEQUACY TESTING FOR DIALYSIS	ICD-9 Diagnosis	V56.3
ENCOUNTER FOR ADEQUACY TESTING FOR HEMODIALYSIS	ICD-9 Diagnosis	V56.31
ENCOUNTER FOR ADEQUACY TESTING FOR PERITONEAL DIALYSIS	ICD-9 Diagnosis	V56.32
AFTERCARE INVOLVING OTHER DIALYSIS	ICD-9 Diagnosis	V56.8
ENCOUNTER FOR AFTERCARE FOLLOWING KIDNEY TRANSPLANT	ICD-10 Diagnosis	Z48.22
ENCOUNTER FOR CARE INVOLVING RENAL DIALYSIS	ICD-10 Diagnosis	Z49
PREPARATORY CARE FOR RENAL DIALYSIS	ICD-10 Diagnosis	Z49.0
ENCOUNTER FOR FITTING AND ADJUSTMENT OF EXTRACORPOREAL DIALYSIS CATHETER	ICD-10 Diagnosis	Z49.01
ENCOUNTER FOR FITTING AND ADJUSTMENT OF PERITONEAL DIALYSIS CATHETER	ICD-10 Diagnosis	Z49.02
ENCOUNTER FOR ADEQUACY TESTING FOR DIALYSIS	ICD-10 Diagnosis	Z49.3
ENCOUNTER FOR ADEQUACY TESTING FOR HEMODIALYSIS	ICD-10 Diagnosis	Z49.31
ENCOUNTER FOR ADEQUACY TESTING FOR PERITONEAL DIALYSIS	ICD-10 Diagnosis	Z49.32
PATIENT'S NONCOMPLIANCE WITH RENAL DIALYSIS	ICD-10 Diagnosis	Z91.15
KIDNEY TRANSPLANT STATUS	ICD-10 Diagnosis	Z94.0
DEPENDENCE ON RENAL DIALYSIS	ICD-10 Diagnosis	Z99.2
RHEUMATOID ARTHRITIS
RHEUMATOID ARTHRITIS WITH RHEUMATOID FACTOR	ICD-10 Diagnosis	M05
FELTY'S SYNDROME	ICD-10 Diagnosis	M05.0
FELTY'S SYNDROME, UNSPECIFIED SITE	ICD-10 Diagnosis	M05.00
FELTY'S SYNDROME, SHOULDER	ICD-10 Diagnosis	M05.01
FELTY'S SYNDROME, RIGHT SHOULDER	ICD-10 Diagnosis	M05.011
FELTY'S SYNDROME, LEFT SHOULDER	ICD-10 Diagnosis	M05.012
FELTY'S SYNDROME, UNSPECIFIED SHOULDER	ICD-10 Diagnosis	M05.019
FELTY'S SYNDROME, ELBOW	ICD-10 Diagnosis	M05.02
FELTY'S SYNDROME, RIGHT ELBOW	ICD-10 Diagnosis	M05.021
FELTY'S SYNDROME, LEFT ELBOW	ICD-10 Diagnosis	M05.022
FELTY'S SYNDROME, UNSPECIFIED ELBOW	ICD-10 Diagnosis	M05.029
FELTY'S SYNDROME, WRIST	ICD-10 Diagnosis	M05.03
FELTY'S SYNDROME, RIGHT WRIST	ICD-10 Diagnosis	M05.031
FELTY'S SYNDROME, LEFT WRIST	ICD-10 Diagnosis	M05.032
FELTY'S SYNDROME, UNSPECIFIED WRIST	ICD-10 Diagnosis	M05.039
FELTY'S SYNDROME, HAND	ICD-10 Diagnosis	M05.04
FELTY'S SYNDROME, RIGHT HAND	ICD-10 Diagnosis	M05.041
FELTY'S SYNDROME, LEFT HAND	ICD-10 Diagnosis	M05.042
FELTY'S SYNDROME, UNSPECIFIED HAND	ICD-10 Diagnosis	M05.049
FELTY'S SYNDROME, HIP	ICD-10 Diagnosis	M05.05
FELTY'S SYNDROME, RIGHT HIP	ICD-10 Diagnosis	M05.051
FELTY'S SYNDROME, LEFT HIP	ICD-10 Diagnosis	M05.052
FELTY'S SYNDROME, UNSPECIFIED HIP	ICD-10 Diagnosis	M05.059
FELTY'S SYNDROME, KNEE	ICD-10 Diagnosis	M05.06
FELTY'S SYNDROME, RIGHT KNEE	ICD-10 Diagnosis	M05.061
FELTY'S SYNDROME, LEFT KNEE	ICD-10 Diagnosis	M05.062
FELTY'S SYNDROME, UNSPECIFIED KNEE	ICD-10 Diagnosis	M05.069
FELTY'S SYNDROME, ANKLE AND FOOT	ICD-10 Diagnosis	M05.07
FELTY'S SYNDROME, RIGHT ANKLE AND FOOT	ICD-10 Diagnosis	M05.071
FELTY'S SYNDROME, LEFT ANKLE AND FOOT	ICD-10 Diagnosis	M05.072
FELTY'S SYNDROME, UNSPECIFIED ANKLE AND FOOT	ICD-10 Diagnosis	M05.079
FELTY'S SYNDROME, MULTIPLE SITES	ICD-10 Diagnosis	M05.09
RHEUMATOID LUNG DISEASE WITH RHEUMATOID ARTHRITIS	ICD-10 Diagnosis	M05.1
RHEUMATOID LUNG DISEASE WITH RHEUMATOID ARTHRITIS OF UNSPECIFIED SITE	ICD-10 Diagnosis	M05.10
RHEUMATOID LUNG DISEASE WITH RHEUMATOID ARTHRITIS OF SHOULDER	ICD-10 Diagnosis	M05.11
RHEUMATOID LUNG DISEASE WITH RHEUMATOID ARTHRITIS OF RIGHT SHOULDER	ICD-10 Diagnosis	M05.111
RHEUMATOID LUNG DISEASE WITH RHEUMATOID ARTHRITIS OF LEFT SHOULDER	ICD-10 Diagnosis	M05.112
RHEUMATOID LUNG DISEASE WITH RHEUMATOID ARTHRITIS OF UNSPECIFIED SHOULDER	ICD-10 Diagnosis	M05.119
RHEUMATOID LUNG DISEASE WITH RHEUMATOID ARTHRITIS OF ELBOW	ICD-10 Diagnosis	M05.12
RHEUMATOID LUNG DISEASE WITH RHEUMATOID ARTHRITIS OF RIGHT ELBOW	ICD-10 Diagnosis	M05.121
RHEUMATOID LUNG DISEASE WITH RHEUMATOID ARTHRITIS OF LEFT ELBOW	ICD-10 Diagnosis	M05.122
RHEUMATOID LUNG DISEASE WITH RHEUMATOID ARTHRITIS OF UNSPECIFIED ELBOW	ICD-10 Diagnosis	M05.129
RHEUMATOID LUNG DISEASE WITH RHEUMATOID ARTHRITIS OF WRIST	ICD-10 Diagnosis	M05.13
RHEUMATOID LUNG DISEASE WITH RHEUMATOID ARTHRITIS OF RIGHT WRIST	ICD-10 Diagnosis	M05.131
RHEUMATOID LUNG DISEASE WITH RHEUMATOID ARTHRITIS OF LEFT WRIST	ICD-10 Diagnosis	M05.132
RHEUMATOID LUNG DISEASE WITH RHEUMATOID ARTHRITIS OF UNSPECIFIED WRIST	ICD-10 Diagnosis	M05.139
RHEUMATOID LUNG DISEASE WITH RHEUMATOID ARTHRITIS OF HAND	ICD-10 Diagnosis	M05.14
RHEUMATOID LUNG DISEASE WITH RHEUMATOID ARTHRITIS OF RIGHT HAND	ICD-10 Diagnosis	M05.141
RHEUMATOID LUNG DISEASE WITH RHEUMATOID ARTHRITIS OF LEFT HAND	ICD-10 Diagnosis	M05.142
RHEUMATOID LUNG DISEASE WITH RHEUMATOID ARTHRITIS OF UNSPECIFIED HAND	ICD-10 Diagnosis	M05.149
RHEUMATOID LUNG DISEASE WITH RHEUMATOID ARTHRITIS OF HIP	ICD-10 Diagnosis	M05.15
RHEUMATOID LUNG DISEASE WITH RHEUMATOID ARTHRITIS OF RIGHT HIP	ICD-10 Diagnosis	M05.151
RHEUMATOID LUNG DISEASE WITH RHEUMATOID ARTHRITIS OF LEFT HIP	ICD-10 Diagnosis	M05.152
RHEUMATOID LUNG DISEASE WITH RHEUMATOID ARTHRITIS OF UNSPECIFIED HIP	ICD-10 Diagnosis	M05.159
RHEUMATOID LUNG DISEASE WITH RHEUMATOID ARTHRITIS OF KNEE	ICD-10 Diagnosis	M05.16
RHEUMATOID LUNG DISEASE WITH RHEUMATOID ARTHRITIS OF RIGHT KNEE	ICD-10 Diagnosis	M05.161
RHEUMATOID LUNG DISEASE WITH RHEUMATOID ARTHRITIS OF LEFT KNEE	ICD-10 Diagnosis	M05.162
RHEUMATOID LUNG DISEASE WITH RHEUMATOID ARTHRITIS OF UNSPECIFIED KNEE	ICD-10 Diagnosis	M05.169
RHEUMATOID LUNG DISEASE WITH RHEUMATOID ARTHRITIS OF ANKLE AND FOOT	ICD-10 Diagnosis	M05.17
RHEUMATOID LUNG DISEASE WITH RHEUMATOID ARTHRITIS OF RIGHT ANKLE AND FOOT	ICD-10 Diagnosis	M05.171
RHEUMATOID LUNG DISEASE WITH RHEUMATOID ARTHRITIS OF LEFT ANKLE AND FOOT	ICD-10 Diagnosis	M05.172
RHEUMATOID LUNG DISEASE WITH RHEUMATOID ARTHRITIS OF UNSPECIFIED ANKLE AND FOOT	ICD-10 Diagnosis	M05.179
RHEUMATOID LUNG DISEASE WITH RHEUMATOID ARTHRITIS OF MULTIPLE SITES	ICD-10 Diagnosis	M05.19
RHEUMATOID VASCULITIS WITH RHEUMATOID ARTHRITIS	ICD-10 Diagnosis	M05.2
RHEUMATOID VASCULITIS WITH RHEUMATOID ARTHRITIS OF UNSPECIFIED SITE	ICD-10 Diagnosis	M05.20
RHEUMATOID VASCULITIS WITH RHEUMATOID ARTHRITIS OF SHOULDER	ICD-10 Diagnosis	M05.21
RHEUMATOID VASCULITIS WITH RHEUMATOID ARTHRITIS OF RIGHT SHOULDER	ICD-10 Diagnosis	M05.211
RHEUMATOID VASCULITIS WITH RHEUMATOID ARTHRITIS OF LEFT SHOULDER	ICD-10 Diagnosis	M05.212
RHEUMATOID VASCULITIS WITH RHEUMATOID ARTHRITIS OF UNSPECIFIED SHOULDER	ICD-10 Diagnosis	M05.219
RHEUMATOID VASCULITIS WITH RHEUMATOID ARTHRITIS OF ELBOW	ICD-10 Diagnosis	M05.22
RHEUMATOID VASCULITIS WITH RHEUMATOID ARTHRITIS OF RIGHT ELBOW	ICD-10 Diagnosis	M05.221
RHEUMATOID VASCULITIS WITH RHEUMATOID ARTHRITIS OF LEFT ELBOW	ICD-10 Diagnosis	M05.222
RHEUMATOID VASCULITIS WITH RHEUMATOID ARTHRITIS OF UNSPECIFIED ELBOW	ICD-10 Diagnosis	M05.229
RHEUMATOID VASCULITIS WITH RHEUMATOID ARTHRITIS OF WRIST	ICD-10 Diagnosis	M05.23
RHEUMATOID VASCULITIS WITH RHEUMATOID ARTHRITIS OF RIGHT WRIST	ICD-10 Diagnosis	M05.231
RHEUMATOID VASCULITIS WITH RHEUMATOID ARTHRITIS OF LEFT WRIST	ICD-10 Diagnosis	M05.232
RHEUMATOID VASCULITIS WITH RHEUMATOID ARTHRITIS OF UNSPECIFIED WRIST	ICD-10 Diagnosis	M05.239
RHEUMATOID VASCULITIS WITH RHEUMATOID ARTHRITIS OF HAND	ICD-10 Diagnosis	M05.24
RHEUMATOID VASCULITIS WITH RHEUMATOID ARTHRITIS OF RIGHT HAND	ICD-10 Diagnosis	M05.241
RHEUMATOID VASCULITIS WITH RHEUMATOID ARTHRITIS OF LEFT HAND	ICD-10 Diagnosis	M05.242
RHEUMATOID VASCULITIS WITH RHEUMATOID ARTHRITIS OF UNSPECIFIED HAND	ICD-10 Diagnosis	M05.249
RHEUMATOID VASCULITIS WITH RHEUMATOID ARTHRITIS OF HIP	ICD-10 Diagnosis	M05.25
RHEUMATOID VASCULITIS WITH RHEUMATOID ARTHRITIS OF RIGHT HIP	ICD-10 Diagnosis	M05.251
RHEUMATOID VASCULITIS WITH RHEUMATOID ARTHRITIS OF LEFT HIP	ICD-10 Diagnosis	M05.252
RHEUMATOID VASCULITIS WITH RHEUMATOID ARTHRITIS OF UNSPECIFIED HIP	ICD-10 Diagnosis	M05.259
RHEUMATOID VASCULITIS WITH RHEUMATOID ARTHRITIS OF KNEE	ICD-10 Diagnosis	M05.26
RHEUMATOID VASCULITIS WITH RHEUMATOID ARTHRITIS OF RIGHT KNEE	ICD-10 Diagnosis	M05.261
RHEUMATOID VASCULITIS WITH RHEUMATOID ARTHRITIS OF LEFT KNEE	ICD-10 Diagnosis	M05.262
RHEUMATOID VASCULITIS WITH RHEUMATOID ARTHRITIS OF UNSPECIFIED KNEE	ICD-10 Diagnosis	M05.269
RHEUMATOID VASCULITIS WITH RHEUMATOID ARTHRITIS OF ANKLE AND FOOT	ICD-10 Diagnosis	M05.27
RHEUMATOID VASCULITIS WITH RHEUMATOID ARTHRITIS OF RIGHT ANKLE AND FOOT	ICD-10 Diagnosis	M05.271
RHEUMATOID VASCULITIS WITH RHEUMATOID ARTHRITIS OF LEFT ANKLE AND FOOT	ICD-10 Diagnosis	M05.272
RHEUMATOID VASCULITIS WITH RHEUMATOID ARTHRITIS OF UNSPECIFIED ANKLE AND FOOT	ICD-10 Diagnosis	M05.279
RHEUMATOID VASCULITIS WITH RHEUMATOID ARTHRITIS OF MULTIPLE SITES	ICD-10 Diagnosis	M05.29
RHEUMATOID HEART DISEASE WITH RHEUMATOID ARTHRITIS	ICD-10 Diagnosis	M05.3
RHEUMATOID HEART DISEASE WITH RHEUMATOID ARTHRITIS OF UNSPECIFIED SITE	ICD-10 Diagnosis	M05.30
RHEUMATOID HEART DISEASE WITH RHEUMATOID ARTHRITIS OF SHOULDER	ICD-10 Diagnosis	M05.31
RHEUMATOID HEART DISEASE WITH RHEUMATOID ARTHRITIS OF RIGHT SHOULDER	ICD-10 Diagnosis	M05.311
RHEUMATOID HEART DISEASE WITH RHEUMATOID ARTHRITIS OF LEFT SHOULDER	ICD-10 Diagnosis	M05.312
RHEUMATOID HEART DISEASE WITH RHEUMATOID ARTHRITIS OF UNSPECIFIED SHOULDER	ICD-10 Diagnosis	M05.319
RHEUMATOID HEART DISEASE WITH RHEUMATOID ARTHRITIS OF ELBOW	ICD-10 Diagnosis	M05.32
RHEUMATOID HEART DISEASE WITH RHEUMATOID ARTHRITIS OF RIGHT ELBOW	ICD-10 Diagnosis	M05.321
RHEUMATOID HEART DISEASE WITH RHEUMATOID ARTHRITIS OF LEFT ELBOW	ICD-10 Diagnosis	M05.322
RHEUMATOID HEART DISEASE WITH RHEUMATOID ARTHRITIS OF UNSPECIFIED ELBOW	ICD-10 Diagnosis	M05.329
RHEUMATOID HEART DISEASE WITH RHEUMATOID ARTHRITIS OF WRIST	ICD-10 Diagnosis	M05.33
RHEUMATOID HEART DISEASE WITH RHEUMATOID ARTHRITIS OF RIGHT WRIST	ICD-10 Diagnosis	M05.331
RHEUMATOID HEART DISEASE WITH RHEUMATOID ARTHRITIS OF LEFT WRIST	ICD-10 Diagnosis	M05.332
RHEUMATOID HEART DISEASE WITH RHEUMATOID ARTHRITIS OF UNSPECIFIED WRIST	ICD-10 Diagnosis	M05.339
RHEUMATOID HEART DISEASE WITH RHEUMATOID ARTHRITIS OF HAND	ICD-10 Diagnosis	M05.34
RHEUMATOID HEART DISEASE WITH RHEUMATOID ARTHRITIS OF RIGHT HAND	ICD-10 Diagnosis	M05.341
RHEUMATOID HEART DISEASE WITH RHEUMATOID ARTHRITIS OF LEFT HAND	ICD-10 Diagnosis	M05.342
RHEUMATOID HEART DISEASE WITH RHEUMATOID ARTHRITIS OF UNSPECIFIED HAND	ICD-10 Diagnosis	M05.349
RHEUMATOID HEART DISEASE WITH RHEUMATOID ARTHRITIS OF HIP	ICD-10 Diagnosis	M05.35
RHEUMATOID HEART DISEASE WITH RHEUMATOID ARTHRITIS OF RIGHT HIP	ICD-10 Diagnosis	M05.351
RHEUMATOID HEART DISEASE WITH RHEUMATOID ARTHRITIS OF LEFT HIP	ICD-10 Diagnosis	M05.352
RHEUMATOID HEART DISEASE WITH RHEUMATOID ARTHRITIS OF UNSPECIFIED HIP	ICD-10 Diagnosis	M05.359
RHEUMATOID HEART DISEASE WITH RHEUMATOID ARTHRITIS OF KNEE	ICD-10 Diagnosis	M05.36
RHEUMATOID HEART DISEASE WITH RHEUMATOID ARTHRITIS OF RIGHT KNEE	ICD-10 Diagnosis	M05.361
RHEUMATOID HEART DISEASE WITH RHEUMATOID ARTHRITIS OF LEFT KNEE	ICD-10 Diagnosis	M05.362
RHEUMATOID HEART DISEASE WITH RHEUMATOID ARTHRITIS OF UNSPECIFIED KNEE	ICD-10 Diagnosis	M05.369
RHEUMATOID HEART DISEASE WITH RHEUMATOID ARTHRITIS OF ANKLE AND FOOT	ICD-10 Diagnosis	M05.37
RHEUMATOID HEART DISEASE WITH RHEUMATOID ARTHRITIS OF RIGHT ANKLE AND FOOT	ICD-10 Diagnosis	M05.371
RHEUMATOID HEART DISEASE WITH RHEUMATOID ARTHRITIS OF LEFT ANKLE AND FOOT	ICD-10 Diagnosis	M05.372
RHEUMATOID HEART DISEASE WITH RHEUMATOID ARTHRITIS OF UNSPECIFIED ANKLE AND FOOT	ICD-10 Diagnosis	M05.379
RHEUMATOID HEART DISEASE WITH RHEUMATOID ARTHRITIS OF MULTIPLE SITES	ICD-10 Diagnosis	M05.39
RHEUMATOID MYOPATHY WITH RHEUMATOID ARTHRITIS	ICD-10 Diagnosis	M05.4
RHEUMATOID MYOPATHY WITH RHEUMATOID ARTHRITIS OF UNSPECIFIED SITE	ICD-10 Diagnosis	M05.40
RHEUMATOID MYOPATHY WITH RHEUMATOID ARTHRITIS OF SHOULDER	ICD-10 Diagnosis	M05.41
RHEUMATOID MYOPATHY WITH RHEUMATOID ARTHRITIS OF RIGHT SHOULDER	ICD-10 Diagnosis	M05.411
RHEUMATOID MYOPATHY WITH RHEUMATOID ARTHRITIS OF LEFT SHOULDER	ICD-10 Diagnosis	M05.412
RHEUMATOID MYOPATHY WITH RHEUMATOID ARTHRITIS OF UNSPECIFIED SHOULDER	ICD-10 Diagnosis	M05.419
RHEUMATOID MYOPATHY WITH RHEUMATOID ARTHRITIS OF ELBOW	ICD-10 Diagnosis	M05.42
RHEUMATOID MYOPATHY WITH RHEUMATOID ARTHRITIS OF RIGHT ELBOW	ICD-10 Diagnosis	M05.421
RHEUMATOID MYOPATHY WITH RHEUMATOID ARTHRITIS OF LEFT ELBOW	ICD-10 Diagnosis	M05.422
RHEUMATOID MYOPATHY WITH RHEUMATOID ARTHRITIS OF UNSPECIFIED ELBOW	ICD-10 Diagnosis	M05.429
RHEUMATOID MYOPATHY WITH RHEUMATOID ARTHRITIS OF WRIST	ICD-10 Diagnosis	M05.43
RHEUMATOID MYOPATHY WITH RHEUMATOID ARTHRITIS OF RIGHT WRIST	ICD-10 Diagnosis	M05.431
RHEUMATOID MYOPATHY WITH RHEUMATOID ARTHRITIS OF LEFT WRIST	ICD-10 Diagnosis	M05.432
RHEUMATOID MYOPATHY WITH RHEUMATOID ARTHRITIS OF UNSPECIFIED WRIST	ICD-10 Diagnosis	M05.439
RHEUMATOID MYOPATHY WITH RHEUMATOID ARTHRITIS OF HAND	ICD-10 Diagnosis	M05.44
RHEUMATOID MYOPATHY WITH RHEUMATOID ARTHRITIS OF RIGHT HAND	ICD-10 Diagnosis	M05.441
RHEUMATOID MYOPATHY WITH RHEUMATOID ARTHRITIS OF LEFT HAND	ICD-10 Diagnosis	M05.442
RHEUMATOID MYOPATHY WITH RHEUMATOID ARTHRITIS OF UNSPECIFIED HAND	ICD-10 Diagnosis	M05.449
RHEUMATOID MYOPATHY WITH RHEUMATOID ARTHRITIS OF HIP	ICD-10 Diagnosis	M05.45
RHEUMATOID MYOPATHY WITH RHEUMATOID ARTHRITIS OF RIGHT HIP	ICD-10 Diagnosis	M05.451
RHEUMATOID MYOPATHY WITH RHEUMATOID ARTHRITIS OF LEFT HIP	ICD-10 Diagnosis	M05.452
RHEUMATOID MYOPATHY WITH RHEUMATOID ARTHRITIS OF UNSPECIFIED HIP	ICD-10 Diagnosis	M05.459
RHEUMATOID MYOPATHY WITH RHEUMATOID ARTHRITIS OF KNEE	ICD-10 Diagnosis	M05.46
RHEUMATOID MYOPATHY WITH RHEUMATOID ARTHRITIS OF RIGHT KNEE	ICD-10 Diagnosis	M05.461
RHEUMATOID MYOPATHY WITH RHEUMATOID ARTHRITIS OF LEFT KNEE	ICD-10 Diagnosis	M05.462
RHEUMATOID MYOPATHY WITH RHEUMATOID ARTHRITIS OF UNSPECIFIED KNEE	ICD-10 Diagnosis	M05.469
RHEUMATOID MYOPATHY WITH RHEUMATOID ARTHRITIS OF ANKLE AND FOOT	ICD-10 Diagnosis	M05.47
RHEUMATOID MYOPATHY WITH RHEUMATOID ARTHRITIS OF RIGHT ANKLE AND FOOT	ICD-10 Diagnosis	M05.471
RHEUMATOID MYOPATHY WITH RHEUMATOID ARTHRITIS OF LEFT ANKLE AND FOOT	ICD-10 Diagnosis	M05.472
RHEUMATOID MYOPATHY WITH RHEUMATOID ARTHRITIS OF UNSPECIFIED ANKLE AND FOOT	ICD-10 Diagnosis	M05.479
RHEUMATOID MYOPATHY WITH RHEUMATOID ARTHRITIS OF MULTIPLE SITES	ICD-10 Diagnosis	M05.49
RHEUMATOID POLYNEUROPATHY WITH RHEUMATOID ARTHRITIS	ICD-10 Diagnosis	M05.5
RHEUMATOID POLYNEUROPATHY WITH RHEUMATOID ARTHRITIS OF UNSPECIFIED SITE	ICD-10 Diagnosis	M05.50
RHEUMATOID POLYNEUROPATHY WITH RHEUMATOID ARTHRITIS OF SHOULDER	ICD-10 Diagnosis	M05.51
RHEUMATOID POLYNEUROPATHY WITH RHEUMATOID ARTHRITIS OF RIGHT SHOULDER	ICD-10 Diagnosis	M05.511
RHEUMATOID POLYNEUROPATHY WITH RHEUMATOID ARTHRITIS OF LEFT SHOULDER	ICD-10 Diagnosis	M05.512
RHEUMATOID POLYNEUROPATHY WITH RHEUMATOID ARTHRITIS OF UNSPECIFIED SHOULDER	ICD-10 Diagnosis	M05.519
RHEUMATOID POLYNEUROPATHY WITH RHEUMATOID ARTHRITIS OF ELBOW	ICD-10 Diagnosis	M05.52
RHEUMATOID POLYNEUROPATHY WITH RHEUMATOID ARTHRITIS OF RIGHT ELBOW	ICD-10 Diagnosis	M05.521
RHEUMATOID POLYNEUROPATHY WITH RHEUMATOID ARTHRITIS OF LEFT ELBOW	ICD-10 Diagnosis	M05.522
RHEUMATOID POLYNEUROPATHY WITH RHEUMATOID ARTHRITIS OF UNSPECIFIED ELBOW	ICD-10 Diagnosis	M05.529
RHEUMATOID POLYNEUROPATHY WITH RHEUMATOID ARTHRITIS OF WRIST	ICD-10 Diagnosis	M05.53
RHEUMATOID POLYNEUROPATHY WITH RHEUMATOID ARTHRITIS OF RIGHT WRIST	ICD-10 Diagnosis	M05.531
RHEUMATOID POLYNEUROPATHY WITH RHEUMATOID ARTHRITIS OF LEFT WRIST	ICD-10 Diagnosis	M05.532
RHEUMATOID POLYNEUROPATHY WITH RHEUMATOID ARTHRITIS OF UNSPECIFIED WRIST	ICD-10 Diagnosis	M05.539
RHEUMATOID POLYNEUROPATHY WITH RHEUMATOID ARTHRITIS OF HAND	ICD-10 Diagnosis	M05.54
RHEUMATOID POLYNEUROPATHY WITH RHEUMATOID ARTHRITIS OF RIGHT HAND	ICD-10 Diagnosis	M05.541
RHEUMATOID POLYNEUROPATHY WITH RHEUMATOID ARTHRITIS OF LEFT HAND	ICD-10 Diagnosis	M05.542
RHEUMATOID POLYNEUROPATHY WITH RHEUMATOID ARTHRITIS OF UNSPECIFIED HAND	ICD-10 Diagnosis	M05.549
RHEUMATOID POLYNEUROPATHY WITH RHEUMATOID ARTHRITIS OF HIP	ICD-10 Diagnosis	M05.55
RHEUMATOID POLYNEUROPATHY WITH RHEUMATOID ARTHRITIS OF RIGHT HIP	ICD-10 Diagnosis	M05.551
RHEUMATOID POLYNEUROPATHY WITH RHEUMATOID ARTHRITIS OF LEFT HIP	ICD-10 Diagnosis	M05.552
RHEUMATOID POLYNEUROPATHY WITH RHEUMATOID ARTHRITIS OF UNSPECIFIED HIP	ICD-10 Diagnosis	M05.559
RHEUMATOID POLYNEUROPATHY WITH RHEUMATOID ARTHRITIS OF KNEE	ICD-10 Diagnosis	M05.56
RHEUMATOID POLYNEUROPATHY WITH RHEUMATOID ARTHRITIS OF RIGHT KNEE	ICD-10 Diagnosis	M05.561
RHEUMATOID POLYNEUROPATHY WITH RHEUMATOID ARTHRITIS OF LEFT KNEE	ICD-10 Diagnosis	M05.562
RHEUMATOID POLYNEUROPATHY WITH RHEUMATOID ARTHRITIS OF UNSPECIFIED KNEE	ICD-10 Diagnosis	M05.569
RHEUMATOID POLYNEUROPATHY WITH RHEUMATOID ARTHRITIS OF ANKLE AND FOOT	ICD-10 Diagnosis	M05.57
RHEUMATOID POLYNEUROPATHY WITH RHEUMATOID ARTHRITIS OF RIGHT ANKLE AND FOOT	ICD-10 Diagnosis	M05.571
RHEUMATOID POLYNEUROPATHY WITH RHEUMATOID ARTHRITIS OF LEFT ANKLE AND FOOT	ICD-10 Diagnosis	M05.572
RHEUMATOID POLYNEUROPATHY WITH RHEUMATOID ARTHRITIS OF UNSPECIFIED ANKLE AND FOOT	ICD-10 Diagnosis	M05.579
RHEUMATOID POLYNEUROPATHY WITH RHEUMATOID ARTHRITIS OF MULTIPLE SITES	ICD-10 Diagnosis	M05.59
RHEUMATOID ARTHRITIS WITH INVOLVEMENT OF OTHER ORGANS AND SYSTEMS	ICD-10 Diagnosis	M05.6
RHEUMATOID ARTHRITIS OF UNSPECIFIED SITE WITH INVOLVEMENT OF OTHER ORGANS AND SYSTEMS	ICD-10 Diagnosis	M05.60
RHEUMATOID ARTHRITIS OF SHOULDER WITH INVOLVEMENT OF OTHER ORGANS AND SYSTEMS	ICD-10 Diagnosis	M05.61
RHEUMATOID ARTHRITIS OF RIGHT SHOULDER WITH INVOLVEMENT OF OTHER ORGANS AND SYSTEMS	ICD-10 Diagnosis	M05.611
RHEUMATOID ARTHRITIS OF LEFT SHOULDER WITH INVOLVEMENT OF OTHER ORGANS AND SYSTEMS	ICD-10 Diagnosis	M05.612
RHEUMATOID ARTHRITIS OF UNSPECIFIED SHOULDER WITH INVOLVEMENT OF OTHER ORGANS AND SYSTEMS	ICD-10 Diagnosis	M05.619
RHEUMATOID ARTHRITIS OF ELBOW WITH INVOLVEMENT OF OTHER ORGANS AND SYSTEMS	ICD-10 Diagnosis	M05.62
RHEUMATOID ARTHRITIS OF RIGHT ELBOW WITH INVOLVEMENT OF OTHER ORGANS AND SYSTEMS	ICD-10 Diagnosis	M05.621
RHEUMATOID ARTHRITIS OF LEFT ELBOW WITH INVOLVEMENT OF OTHER ORGANS AND SYSTEMS	ICD-10 Diagnosis	M05.622
RHEUMATOID ARTHRITIS OF UNSPECIFIED ELBOW WITH INVOLVEMENT OF OTHER ORGANS AND SYSTEMS	ICD-10 Diagnosis	M05.629
RHEUMATOID ARTHRITIS OF WRIST WITH INVOLVEMENT OF OTHER ORGANS AND SYSTEMS	ICD-10 Diagnosis	M05.63
RHEUMATOID ARTHRITIS OF RIGHT WRIST WITH INVOLVEMENT OF OTHER ORGANS AND SYSTEMS	ICD-10 Diagnosis	M05.631
RHEUMATOID ARTHRITIS OF LEFT WRIST WITH INVOLVEMENT OF OTHER ORGANS AND SYSTEMS	ICD-10 Diagnosis	M05.632
RHEUMATOID ARTHRITIS OF UNSPECIFIED WRIST WITH INVOLVEMENT OF OTHER ORGANS AND SYSTEMS	ICD-10 Diagnosis	M05.639
RHEUMATOID ARTHRITIS OF HAND WITH INVOLVEMENT OF OTHER ORGANS AND SYSTEMS	ICD-10 Diagnosis	M05.64
RHEUMATOID ARTHRITIS OF RIGHT HAND WITH INVOLVEMENT OF OTHER ORGANS AND SYSTEMS	ICD-10 Diagnosis	M05.641
RHEUMATOID ARTHRITIS OF LEFT HAND WITH INVOLVEMENT OF OTHER ORGANS AND SYSTEMS	ICD-10 Diagnosis	M05.642
RHEUMATOID ARTHRITIS OF UNSPECIFIED HAND WITH INVOLVEMENT OF OTHER ORGANS AND SYSTEMS	ICD-10 Diagnosis	M05.649
RHEUMATOID ARTHRITIS OF HIP WITH INVOLVEMENT OF OTHER ORGANS AND SYSTEMS	ICD-10 Diagnosis	M05.65
RHEUMATOID ARTHRITIS OF RIGHT HIP WITH INVOLVEMENT OF OTHER ORGANS AND SYSTEMS	ICD-10 Diagnosis	M05.651
RHEUMATOID ARTHRITIS OF LEFT HIP WITH INVOLVEMENT OF OTHER ORGANS AND SYSTEMS	ICD-10 Diagnosis	M05.652
RHEUMATOID ARTHRITIS OF UNSPECIFIED HIP WITH INVOLVEMENT OF OTHER ORGANS AND SYSTEMS	ICD-10 Diagnosis	M05.659
RHEUMATOID ARTHRITIS OF KNEE WITH INVOLVEMENT OF OTHER ORGANS AND SYSTEMS	ICD-10 Diagnosis	M05.66
RHEUMATOID ARTHRITIS OF RIGHT KNEE WITH INVOLVEMENT OF OTHER ORGANS AND SYSTEMS	ICD-10 Diagnosis	M05.661
RHEUMATOID ARTHRITIS OF LEFT KNEE WITH INVOLVEMENT OF OTHER ORGANS AND SYSTEMS	ICD-10 Diagnosis	M05.662
RHEUMATOID ARTHRITIS OF UNSPECIFIED KNEE WITH INVOLVEMENT OF OTHER ORGANS AND SYSTEMS	ICD-10 Diagnosis	M05.669
RHEUMATOID ARTHRITIS OF ANKLE AND FOOT WITH INVOLVEMENT OF OTHER ORGANS AND SYSTEMS	ICD-10 Diagnosis	M05.67
RHEUMATOID ARTHRITIS OF RIGHT ANKLE AND FOOT WITH INVOLVEMENT OF OTHER ORGANS AND SYSTEMS	ICD-10 Diagnosis	M05.671
RHEUMATOID ARTHRITIS OF LEFT ANKLE AND FOOT WITH INVOLVEMENT OF OTHER ORGANS AND SYSTEMS	ICD-10 Diagnosis	M05.672
RHEUMATOID ARTHRITIS OF UNSPECIFIED ANKLE AND FOOT WITH INVOLVEMENT OF OTHER ORGANS AND SYSTEMS	ICD-10 Diagnosis	M05.679
RHEUMATOID ARTHRITIS OF MULTIPLE SITES WITH INVOLVEMENT OF OTHER ORGANS AND SYSTEMS	ICD-10 Diagnosis	M05.69
RHEUMATOID ARTHRITIS WITH RHEUMATOID FACTOR WITHOUT ORGAN OR SYSTEMS INVOLVEMENT	ICD-10 Diagnosis	M05.7
RHEUMATOID ARTHRITIS WITH RHEUMATOID FACTOR OF UNSPECIFIED SITE WITHOUT ORGAN OR SYSTEMS INVOLVEMENT	ICD-10 Diagnosis	M05.70
RHEUMATOID ARTHRITIS WITH RHEUMATOID FACTOR OF SHOULDER WITHOUT ORGAN OR SYSTEMS INVOLVEMENT	ICD-10 Diagnosis	M05.71
RHEUMATOID ARTHRITIS WITH RHEUMATOID FACTOR OF RIGHT SHOULDER WITHOUT ORGAN OR SYSTEMS INVOLVEMENT	ICD-10 Diagnosis	M05.711
RHEUMATOID ARTHRITIS WITH RHEUMATOID FACTOR OF LEFT SHOULDER WITHOUT ORGAN OR SYSTEMS INVOLVEMENT	ICD-10 Diagnosis	M05.712
RHEUMATOID ARTHRITIS WITH RHEUMATOID FACTOR OF UNSPECIFIED SHOULDER WITHOUT ORGAN OR SYSTEMS INVOLVEMENT	ICD-10 Diagnosis	M05.719
RHEUMATOID ARTHRITIS WITH RHEUMATOID FACTOR OF ELBOW WITHOUT ORGAN OR SYSTEMS INVOLVEMENT	ICD-10 Diagnosis	M05.72
RHEUMATOID ARTHRITIS WITH RHEUMATOID FACTOR OF RIGHT ELBOW WITHOUT ORGAN OR SYSTEMS INVOLVEMENT	ICD-10 Diagnosis	M05.721
RHEUMATOID ARTHRITIS WITH RHEUMATOID FACTOR OF LEFT ELBOW WITHOUT ORGAN OR SYSTEMS INVOLVEMENT	ICD-10 Diagnosis	M05.722
RHEUMATOID ARTHRITIS WITH RHEUMATOID FACTOR OF UNSPECIFIED ELBOW WITHOUT ORGAN OR SYSTEMS INVOLVEMENT	ICD-10 Diagnosis	M05.729
RHEUMATOID ARTHRITIS WITH RHEUMATOID FACTOR OF WRIST WITHOUT ORGAN OR SYSTEMS INVOLVEMENT	ICD-10 Diagnosis	M05.73
RHEUMATOID ARTHRITIS WITH RHEUMATOID FACTOR OF RIGHT WRIST WITHOUT ORGAN OR SYSTEMS INVOLVEMENT	ICD-10 Diagnosis	M05.731
RHEUMATOID ARTHRITIS WITH RHEUMATOID FACTOR OF LEFT WRIST WITHOUT ORGAN OR SYSTEMS INVOLVEMENT	ICD-10 Diagnosis	M05.732
RHEUMATOID ARTHRITIS WITH RHEUMATOID FACTOR OF UNSPECIFIED WRIST WITHOUT ORGAN OR SYSTEMS INVOLVEMENT	ICD-10 Diagnosis	M05.739
RHEUMATOID ARTHRITIS WITH RHEUMATOID FACTOR OF HAND WITHOUT ORGAN OR SYSTEMS INVOLVEMENT	ICD-10 Diagnosis	M05.74
RHEUMATOID ARTHRITIS WITH RHEUMATOID FACTOR OF RIGHT HAND WITHOUT ORGAN OR SYSTEMS INVOLVEMENT	ICD-10 Diagnosis	M05.741
RHEUMATOID ARTHRITIS WITH RHEUMATOID FACTOR OF LEFT HAND WITHOUT ORGAN OR SYSTEMS INVOLVEMENT	ICD-10 Diagnosis	M05.742
RHEUMATOID ARTHRITIS WITH RHEUMATOID FACTOR OF UNSPECIFIED HAND WITHOUT ORGAN OR SYSTEMS INVOLVEMENT	ICD-10 Diagnosis	M05.749
RHEUMATOID ARTHRITIS WITH RHEUMATOID FACTOR OF HIP WITHOUT ORGAN OR SYSTEMS INVOLVEMENT	ICD-10 Diagnosis	M05.75
RHEUMATOID ARTHRITIS WITH RHEUMATOID FACTOR OF RIGHT HIP WITHOUT ORGAN OR SYSTEMS INVOLVEMENT	ICD-10 Diagnosis	M05.751
RHEUMATOID ARTHRITIS WITH RHEUMATOID FACTOR OF LEFT HIP WITHOUT ORGAN OR SYSTEMS INVOLVEMENT	ICD-10 Diagnosis	M05.752
RHEUMATOID ARTHRITIS WITH RHEUMATOID FACTOR OF UNSPECIFIED HIP WITHOUT ORGAN OR SYSTEMS INVOLVEMENT	ICD-10 Diagnosis	M05.759
RHEUMATOID ARTHRITIS WITH RHEUMATOID FACTOR OF KNEE WITHOUT ORGAN OR SYSTEMS INVOLVEMENT	ICD-10 Diagnosis	M05.76
RHEUMATOID ARTHRITIS WITH RHEUMATOID FACTOR OF RIGHT KNEE WITHOUT ORGAN OR SYSTEMS INVOLVEMENT	ICD-10 Diagnosis	M05.761
RHEUMATOID ARTHRITIS WITH RHEUMATOID FACTOR OF LEFT KNEE WITHOUT ORGAN OR SYSTEMS INVOLVEMENT	ICD-10 Diagnosis	M05.762
RHEUMATOID ARTHRITIS WITH RHEUMATOID FACTOR OF UNSPECIFIED KNEE WITHOUT ORGAN OR SYSTEMS INVOLVEMENT	ICD-10 Diagnosis	M05.769
RHEUMATOID ARTHRITIS WITH RHEUMATOID FACTOR OF ANKLE AND FOOT WITHOUT ORGAN OR SYSTEMS INVOLVEMENT	ICD-10 Diagnosis	M05.77
RHEUMATOID ARTHRITIS WITH RHEUMATOID FACTOR OF RIGHT ANKLE AND FOOT WITHOUT ORGAN OR SYSTEMS INVOLVEMENT	ICD-10 Diagnosis	M05.771
RHEUMATOID ARTHRITIS WITH RHEUMATOID FACTOR OF LEFT ANKLE AND FOOT WITHOUT ORGAN OR SYSTEMS INVOLVEMENT	ICD-10 Diagnosis	M05.772
RHEUMATOID ARTHRITIS WITH RHEUMATOID FACTOR OF UNSPECIFIED ANKLE AND FOOT WITHOUT ORGAN OR SYSTEMS INVOLVEMENT	ICD-10 Diagnosis	M05.779
RHEUMATOID ARTHRITIS WITH RHEUMATOID FACTOR OF MULTIPLE SITES WITHOUT ORGAN OR SYSTEMS INVOLVEMENT	ICD-10 Diagnosis	M05.79
OTHER RHEUMATOID ARTHRITIS WITH RHEUMATOID FACTOR	ICD-10 Diagnosis	M05.8
OTHER RHEUMATOID ARTHRITIS WITH RHEUMATOID FACTOR OF UNSPECIFIED SITE	ICD-10 Diagnosis	M05.80
OTHER RHEUMATOID ARTHRITIS WITH RHEUMATOID FACTOR OF SHOULDER	ICD-10 Diagnosis	M05.81
OTHER RHEUMATOID ARTHRITIS WITH RHEUMATOID FACTOR OF RIGHT SHOULDER	ICD-10 Diagnosis	M05.811
OTHER RHEUMATOID ARTHRITIS WITH RHEUMATOID FACTOR OF LEFT SHOULDER	ICD-10 Diagnosis	M05.812
OTHER RHEUMATOID ARTHRITIS WITH RHEUMATOID FACTOR OF UNSPECIFIED SHOULDER	ICD-10 Diagnosis	M05.819
OTHER RHEUMATOID ARTHRITIS WITH RHEUMATOID FACTOR OF ELBOW	ICD-10 Diagnosis	M05.82
OTHER RHEUMATOID ARTHRITIS WITH RHEUMATOID FACTOR OF RIGHT ELBOW	ICD-10 Diagnosis	M05.821
OTHER RHEUMATOID ARTHRITIS WITH RHEUMATOID FACTOR OF LEFT ELBOW	ICD-10 Diagnosis	M05.822
OTHER RHEUMATOID ARTHRITIS WITH RHEUMATOID FACTOR OF UNSPECIFIED ELBOW	ICD-10 Diagnosis	M05.829
OTHER RHEUMATOID ARTHRITIS WITH RHEUMATOID FACTOR OF WRIST	ICD-10 Diagnosis	M05.83
OTHER RHEUMATOID ARTHRITIS WITH RHEUMATOID FACTOR OF RIGHT WRIST	ICD-10 Diagnosis	M05.831
OTHER RHEUMATOID ARTHRITIS WITH RHEUMATOID FACTOR OF LEFT WRIST	ICD-10 Diagnosis	M05.832
OTHER RHEUMATOID ARTHRITIS WITH RHEUMATOID FACTOR OF UNSPECIFIED WRIST	ICD-10 Diagnosis	M05.839
OTHER RHEUMATOID ARTHRITIS WITH RHEUMATOID FACTOR OF HAND	ICD-10 Diagnosis	M05.84
OTHER RHEUMATOID ARTHRITIS WITH RHEUMATOID FACTOR OF RIGHT HAND	ICD-10 Diagnosis	M05.841
OTHER RHEUMATOID ARTHRITIS WITH RHEUMATOID FACTOR OF LEFT HAND	ICD-10 Diagnosis	M05.842
OTHER RHEUMATOID ARTHRITIS WITH RHEUMATOID FACTOR OF UNSPECIFIED HAND	ICD-10 Diagnosis	M05.849
OTHER RHEUMATOID ARTHRITIS WITH RHEUMATOID FACTOR OF HIP	ICD-10 Diagnosis	M05.85
OTHER RHEUMATOID ARTHRITIS WITH RHEUMATOID FACTOR OF RIGHT HIP	ICD-10 Diagnosis	M05.851
OTHER RHEUMATOID ARTHRITIS WITH RHEUMATOID FACTOR OF LEFT HIP	ICD-10 Diagnosis	M05.852
OTHER RHEUMATOID ARTHRITIS WITH RHEUMATOID FACTOR OF UNSPECIFIED HIP	ICD-10 Diagnosis	M05.859
OTHER RHEUMATOID ARTHRITIS WITH RHEUMATOID FACTOR OF KNEE	ICD-10 Diagnosis	M05.86
OTHER RHEUMATOID ARTHRITIS WITH RHEUMATOID FACTOR OF RIGHT KNEE	ICD-10 Diagnosis	M05.861
OTHER RHEUMATOID ARTHRITIS WITH RHEUMATOID FACTOR OF LEFT KNEE	ICD-10 Diagnosis	M05.862
OTHER RHEUMATOID ARTHRITIS WITH RHEUMATOID FACTOR OF UNSPECIFIED KNEE	ICD-10 Diagnosis	M05.869
OTHER RHEUMATOID ARTHRITIS WITH RHEUMATOID FACTOR OF ANKLE AND FOOT	ICD-10 Diagnosis	M05.87
OTHER RHEUMATOID ARTHRITIS WITH RHEUMATOID FACTOR OF RIGHT ANKLE AND FOOT	ICD-10 Diagnosis	M05.871
OTHER RHEUMATOID ARTHRITIS WITH RHEUMATOID FACTOR OF LEFT ANKLE AND FOOT	ICD-10 Diagnosis	M05.872
OTHER RHEUMATOID ARTHRITIS WITH RHEUMATOID FACTOR OF UNSPECIFIED ANKLE AND FOOT	ICD-10 Diagnosis	M05.879
OTHER RHEUMATOID ARTHRITIS WITH RHEUMATOID FACTOR OF MULTIPLE SITES	ICD-10 Diagnosis	M05.89
RHEUMATOID ARTHRITIS WITH RHEUMATOID FACTOR, UNSPECIFIED	ICD-10 Diagnosis	M05.9
OTHER RHEUMATOID ARTHRITIS	ICD-10 Diagnosis	M06
RHEUMATOID ARTHRITIS WITHOUT RHEUMATOID FACTOR	ICD-10 Diagnosis	M06.0
RHEUMATOID ARTHRITIS WITHOUT RHEUMATOID FACTOR, UNSPECIFIED SITE	ICD-10 Diagnosis	M06.00
RHEUMATOID ARTHRITIS WITHOUT RHEUMATOID FACTOR, SHOULDER	ICD-10 Diagnosis	M06.01
RHEUMATOID ARTHRITIS WITHOUT RHEUMATOID FACTOR, RIGHT SHOULDER	ICD-10 Diagnosis	M06.011
RHEUMATOID ARTHRITIS WITHOUT RHEUMATOID FACTOR, LEFT SHOULDER	ICD-10 Diagnosis	M06.012
RHEUMATOID ARTHRITIS WITHOUT RHEUMATOID FACTOR, UNSPECIFIED SHOULDER	ICD-10 Diagnosis	M06.019
RHEUMATOID ARTHRITIS WITHOUT RHEUMATOID FACTOR, ELBOW	ICD-10 Diagnosis	M06.02
RHEUMATOID ARTHRITIS WITHOUT RHEUMATOID FACTOR, RIGHT ELBOW	ICD-10 Diagnosis	M06.021
RHEUMATOID ARTHRITIS WITHOUT RHEUMATOID FACTOR, LEFT ELBOW	ICD-10 Diagnosis	M06.022
RHEUMATOID ARTHRITIS WITHOUT RHEUMATOID FACTOR, UNSPECIFIED ELBOW	ICD-10 Diagnosis	M06.029
RHEUMATOID ARTHRITIS WITHOUT RHEUMATOID FACTOR, WRIST	ICD-10 Diagnosis	M06.03
RHEUMATOID ARTHRITIS WITHOUT RHEUMATOID FACTOR, RIGHT WRIST	ICD-10 Diagnosis	M06.031
RHEUMATOID ARTHRITIS WITHOUT RHEUMATOID FACTOR, LEFT WRIST	ICD-10 Diagnosis	M06.032
RHEUMATOID ARTHRITIS WITHOUT RHEUMATOID FACTOR, UNSPECIFIED WRIST	ICD-10 Diagnosis	M06.039
RHEUMATOID ARTHRITIS WITHOUT RHEUMATOID FACTOR, HAND	ICD-10 Diagnosis	M06.04
RHEUMATOID ARTHRITIS WITHOUT RHEUMATOID FACTOR, RIGHT HAND	ICD-10 Diagnosis	M06.041
RHEUMATOID ARTHRITIS WITHOUT RHEUMATOID FACTOR, LEFT HAND	ICD-10 Diagnosis	M06.042
RHEUMATOID ARTHRITIS WITHOUT RHEUMATOID FACTOR, UNSPECIFIED HAND	ICD-10 Diagnosis	M06.049
RHEUMATOID ARTHRITIS WITHOUT RHEUMATOID FACTOR, HIP	ICD-10 Diagnosis	M06.05
RHEUMATOID ARTHRITIS WITHOUT RHEUMATOID FACTOR, RIGHT HIP	ICD-10 Diagnosis	M06.051
RHEUMATOID ARTHRITIS WITHOUT RHEUMATOID FACTOR, LEFT HIP	ICD-10 Diagnosis	M06.052
RHEUMATOID ARTHRITIS WITHOUT RHEUMATOID FACTOR, UNSPECIFIED HIP	ICD-10 Diagnosis	M06.059
RHEUMATOID ARTHRITIS WITHOUT RHEUMATOID FACTOR, KNEE	ICD-10 Diagnosis	M06.06
RHEUMATOID ARTHRITIS WITHOUT RHEUMATOID FACTOR, RIGHT KNEE	ICD-10 Diagnosis	M06.061
RHEUMATOID ARTHRITIS WITHOUT RHEUMATOID FACTOR, LEFT KNEE	ICD-10 Diagnosis	M06.062
RHEUMATOID ARTHRITIS WITHOUT RHEUMATOID FACTOR, UNSPECIFIED KNEE	ICD-10 Diagnosis	M06.069
RHEUMATOID ARTHRITIS WITHOUT RHEUMATOID FACTOR, ANKLE AND FOOT	ICD-10 Diagnosis	M06.07
RHEUMATOID ARTHRITIS WITHOUT RHEUMATOID FACTOR, RIGHT ANKLE AND FOOT	ICD-10 Diagnosis	M06.071
RHEUMATOID ARTHRITIS WITHOUT RHEUMATOID FACTOR, LEFT ANKLE AND FOOT	ICD-10 Diagnosis	M06.072
RHEUMATOID ARTHRITIS WITHOUT RHEUMATOID FACTOR, UNSPECIFIED ANKLE AND FOOT	ICD-10 Diagnosis	M06.079
RHEUMATOID ARTHRITIS WITHOUT RHEUMATOID FACTOR, VERTEBRAE	ICD-10 Diagnosis	M06.08
RHEUMATOID ARTHRITIS WITHOUT RHEUMATOID FACTOR, MULTIPLE SITES	ICD-10 Diagnosis	M06.09
ADULT-ONSET STILL'S DISEASE	ICD-10 Diagnosis	M06.1
RHEUMATOID BURSITIS	ICD-10 Diagnosis	M06.2
RHEUMATOID BURSITIS, UNSPECIFIED SITE	ICD-10 Diagnosis	M06.20
RHEUMATOID BURSITIS, SHOULDER	ICD-10 Diagnosis	M06.21
RHEUMATOID BURSITIS, RIGHT SHOULDER	ICD-10 Diagnosis	M06.211
RHEUMATOID BURSITIS, LEFT SHOULDER	ICD-10 Diagnosis	M06.212
RHEUMATOID BURSITIS, UNSPECIFIED SHOULDER	ICD-10 Diagnosis	M06.219
RHEUMATOID BURSITIS, ELBOW	ICD-10 Diagnosis	M06.22
RHEUMATOID BURSITIS, RIGHT ELBOW	ICD-10 Diagnosis	M06.221
RHEUMATOID BURSITIS, LEFT ELBOW	ICD-10 Diagnosis	M06.222
RHEUMATOID BURSITIS, UNSPECIFIED ELBOW	ICD-10 Diagnosis	M06.229
RHEUMATOID BURSITIS, WRIST	ICD-10 Diagnosis	M06.23
RHEUMATOID BURSITIS, RIGHT WRIST	ICD-10 Diagnosis	M06.231
RHEUMATOID BURSITIS, LEFT WRIST	ICD-10 Diagnosis	M06.232
RHEUMATOID BURSITIS, UNSPECIFIED WRIST	ICD-10 Diagnosis	M06.239
RHEUMATOID BURSITIS, HAND	ICD-10 Diagnosis	M06.24
RHEUMATOID BURSITIS, RIGHT HAND	ICD-10 Diagnosis	M06.241
RHEUMATOID BURSITIS, LEFT HAND	ICD-10 Diagnosis	M06.242
RHEUMATOID BURSITIS, UNSPECIFIED HAND	ICD-10 Diagnosis	M06.249
RHEUMATOID BURSITIS, HIP	ICD-10 Diagnosis	M06.25
RHEUMATOID BURSITIS, RIGHT HIP	ICD-10 Diagnosis	M06.251
RHEUMATOID BURSITIS, LEFT HIP	ICD-10 Diagnosis	M06.252
RHEUMATOID BURSITIS, UNSPECIFIED HIP	ICD-10 Diagnosis	M06.259
RHEUMATOID BURSITIS, KNEE	ICD-10 Diagnosis	M06.26
RHEUMATOID BURSITIS, RIGHT KNEE	ICD-10 Diagnosis	M06.261
RHEUMATOID BURSITIS, LEFT KNEE	ICD-10 Diagnosis	M06.262
RHEUMATOID BURSITIS, UNSPECIFIED KNEE	ICD-10 Diagnosis	M06.269
RHEUMATOID BURSITIS, ANKLE AND FOOT	ICD-10 Diagnosis	M06.27
RHEUMATOID BURSITIS, RIGHT ANKLE AND FOOT	ICD-10 Diagnosis	M06.271
RHEUMATOID BURSITIS, LEFT ANKLE AND FOOT	ICD-10 Diagnosis	M06.272
RHEUMATOID BURSITIS, UNSPECIFIED ANKLE AND FOOT	ICD-10 Diagnosis	M06.279
RHEUMATOID BURSITIS, VERTEBRAE	ICD-10 Diagnosis	M06.28
RHEUMATOID BURSITIS, MULTIPLE SITES	ICD-10 Diagnosis	M06.29
RHEUMATOID NODULE	ICD-10 Diagnosis	M06.3
RHEUMATOID NODULE, UNSPECIFIED SITE	ICD-10 Diagnosis	M06.30
RHEUMATOID NODULE, SHOULDER	ICD-10 Diagnosis	M06.31
RHEUMATOID NODULE, RIGHT SHOULDER	ICD-10 Diagnosis	M06.311
RHEUMATOID NODULE, LEFT SHOULDER	ICD-10 Diagnosis	M06.312
RHEUMATOID NODULE, UNSPECIFIED SHOULDER	ICD-10 Diagnosis	M06.319
RHEUMATOID NODULE, ELBOW	ICD-10 Diagnosis	M06.32
RHEUMATOID NODULE, RIGHT ELBOW	ICD-10 Diagnosis	M06.321
RHEUMATOID NODULE, LEFT ELBOW	ICD-10 Diagnosis	M06.322
RHEUMATOID NODULE, UNSPECIFIED ELBOW	ICD-10 Diagnosis	M06.329
RHEUMATOID NODULE, WRIST	ICD-10 Diagnosis	M06.33
RHEUMATOID NODULE, RIGHT WRIST	ICD-10 Diagnosis	M06.331
RHEUMATOID NODULE, LEFT WRIST	ICD-10 Diagnosis	M06.332
RHEUMATOID NODULE, UNSPECIFIED WRIST	ICD-10 Diagnosis	M06.339
RHEUMATOID NODULE, HAND	ICD-10 Diagnosis	M06.34
RHEUMATOID NODULE, RIGHT HAND	ICD-10 Diagnosis	M06.341
RHEUMATOID NODULE, LEFT HAND	ICD-10 Diagnosis	M06.342
RHEUMATOID NODULE, UNSPECIFIED HAND	ICD-10 Diagnosis	M06.349
RHEUMATOID NODULE, HIP	ICD-10 Diagnosis	M06.35
RHEUMATOID NODULE, RIGHT HIP	ICD-10 Diagnosis	M06.351
RHEUMATOID NODULE, LEFT HIP	ICD-10 Diagnosis	M06.352
RHEUMATOID NODULE, UNSPECIFIED HIP	ICD-10 Diagnosis	M06.359
RHEUMATOID NODULE, KNEE	ICD-10 Diagnosis	M06.36
RHEUMATOID NODULE, RIGHT KNEE	ICD-10 Diagnosis	M06.361
RHEUMATOID NODULE, LEFT KNEE	ICD-10 Diagnosis	M06.362
RHEUMATOID NODULE, UNSPECIFIED KNEE	ICD-10 Diagnosis	M06.369
RHEUMATOID NODULE, ANKLE AND FOOT	ICD-10 Diagnosis	M06.37
RHEUMATOID NODULE, RIGHT ANKLE AND FOOT	ICD-10 Diagnosis	M06.371
RHEUMATOID NODULE, LEFT ANKLE AND FOOT	ICD-10 Diagnosis	M06.372
RHEUMATOID NODULE, UNSPECIFIED ANKLE AND FOOT	ICD-10 Diagnosis	M06.379
RHEUMATOID NODULE, VERTEBRAE	ICD-10 Diagnosis	M06.38
RHEUMATOID NODULE, MULTIPLE SITES	ICD-10 Diagnosis	M06.39
INFLAMMATORY POLYARTHROPATHY	ICD-10 Diagnosis	M06.4
OTHER SPECIFIED RHEUMATOID ARTHRITIS	ICD-10 Diagnosis	M06.8
OTHER SPECIFIED RHEUMATOID ARTHRITIS, UNSPECIFIED SITE	ICD-10 Diagnosis	M06.80
OTHER SPECIFIED RHEUMATOID ARTHRITIS, SHOULDER	ICD-10 Diagnosis	M06.81
OTHER SPECIFIED RHEUMATOID ARTHRITIS, RIGHT SHOULDER	ICD-10 Diagnosis	M06.811
OTHER SPECIFIED RHEUMATOID ARTHRITIS, LEFT SHOULDER	ICD-10 Diagnosis	M06.812
OTHER SPECIFIED RHEUMATOID ARTHRITIS, UNSPECIFIED SHOULDER	ICD-10 Diagnosis	M06.819
OTHER SPECIFIED RHEUMATOID ARTHRITIS, ELBOW	ICD-10 Diagnosis	M06.82
OTHER SPECIFIED RHEUMATOID ARTHRITIS, RIGHT ELBOW	ICD-10 Diagnosis	M06.821
OTHER SPECIFIED RHEUMATOID ARTHRITIS, LEFT ELBOW	ICD-10 Diagnosis	M06.822
OTHER SPECIFIED RHEUMATOID ARTHRITIS, UNSPECIFIED ELBOW	ICD-10 Diagnosis	M06.829
OTHER SPECIFIED RHEUMATOID ARTHRITIS, WRIST	ICD-10 Diagnosis	M06.83
OTHER SPECIFIED RHEUMATOID ARTHRITIS, RIGHT WRIST	ICD-10 Diagnosis	M06.831
OTHER SPECIFIED RHEUMATOID ARTHRITIS, LEFT WRIST	ICD-10 Diagnosis	M06.832
OTHER SPECIFIED RHEUMATOID ARTHRITIS, UNSPECIFIED WRIST	ICD-10 Diagnosis	M06.839
OTHER SPECIFIED RHEUMATOID ARTHRITIS, HAND	ICD-10 Diagnosis	M06.84
OTHER SPECIFIED RHEUMATOID ARTHRITIS, RIGHT HAND	ICD-10 Diagnosis	M06.841
OTHER SPECIFIED RHEUMATOID ARTHRITIS, LEFT HAND	ICD-10 Diagnosis	M06.842
OTHER SPECIFIED RHEUMATOID ARTHRITIS, UNSPECIFIED HAND	ICD-10 Diagnosis	M06.849
OTHER SPECIFIED RHEUMATOID ARTHRITIS, HIP	ICD-10 Diagnosis	M06.85
OTHER SPECIFIED RHEUMATOID ARTHRITIS, RIGHT HIP	ICD-10 Diagnosis	M06.851
OTHER SPECIFIED RHEUMATOID ARTHRITIS, LEFT HIP	ICD-10 Diagnosis	M06.852
OTHER SPECIFIED RHEUMATOID ARTHRITIS, UNSPECIFIED HIP	ICD-10 Diagnosis	M06.859
OTHER SPECIFIED RHEUMATOID ARTHRITIS, KNEE	ICD-10 Diagnosis	M06.86
OTHER SPECIFIED RHEUMATOID ARTHRITIS, RIGHT KNEE	ICD-10 Diagnosis	M06.861
OTHER SPECIFIED RHEUMATOID ARTHRITIS, LEFT KNEE	ICD-10 Diagnosis	M06.862
OTHER SPECIFIED RHEUMATOID ARTHRITIS, UNSPECIFIED KNEE	ICD-10 Diagnosis	M06.869
OTHER SPECIFIED RHEUMATOID ARTHRITIS, ANKLE AND FOOT	ICD-10 Diagnosis	M06.87
OTHER SPECIFIED RHEUMATOID ARTHRITIS, RIGHT ANKLE AND FOOT	ICD-10 Diagnosis	M06.871
OTHER SPECIFIED RHEUMATOID ARTHRITIS, LEFT ANKLE AND FOOT	ICD-10 Diagnosis	M06.872
OTHER SPECIFIED RHEUMATOID ARTHRITIS, UNSPECIFIED ANKLE AND FOOT	ICD-10 Diagnosis	M06.879
OTHER SPECIFIED RHEUMATOID ARTHRITIS, VERTEBRAE	ICD-10 Diagnosis	M06.88
OTHER SPECIFIED RHEUMATOID ARTHRITIS, MULTIPLE SITES	ICD-10 Diagnosis	M06.89
RHEUMATOID ARTHRITIS, UNSPECIFIED	ICD-10 Diagnosis	M06.9
JUVENILE ARTHRITIS	ICD-10 Diagnosis	M08
UNSPECIFIED JUVENILE RHEUMATOID ARTHRITIS	ICD-10 Diagnosis	M08.0
UNSPECIFIED JUVENILE RHEUMATOID ARTHRITIS OF UNSPECIFIED SITE	ICD-10 Diagnosis	M08.00
UNSPECIFIED JUVENILE RHEUMATOID ARTHRITIS, SHOULDER	ICD-10 Diagnosis	M08.01
UNSPECIFIED JUVENILE RHEUMATOID ARTHRITIS, RIGHT SHOULDER	ICD-10 Diagnosis	M08.011
UNSPECIFIED JUVENILE RHEUMATOID ARTHRITIS, LEFT SHOULDER	ICD-10 Diagnosis	M08.012
UNSPECIFIED JUVENILE RHEUMATOID ARTHRITIS, UNSPECIFIED SHOULDER	ICD-10 Diagnosis	M08.019
UNSPECIFIED JUVENILE RHEUMATOID ARTHRITIS OF ELBOW	ICD-10 Diagnosis	M08.02
UNSPECIFIED JUVENILE RHEUMATOID ARTHRITIS, RIGHT ELBOW	ICD-10 Diagnosis	M08.021
UNSPECIFIED JUVENILE RHEUMATOID ARTHRITIS, LEFT ELBOW	ICD-10 Diagnosis	M08.022
UNSPECIFIED JUVENILE RHEUMATOID ARTHRITIS, UNSPECIFIED ELBOW	ICD-10 Diagnosis	M08.029
UNSPECIFIED JUVENILE RHEUMATOID ARTHRITIS, WRIST	ICD-10 Diagnosis	M08.03
UNSPECIFIED JUVENILE RHEUMATOID ARTHRITIS, RIGHT WRIST	ICD-10 Diagnosis	M08.031
UNSPECIFIED JUVENILE RHEUMATOID ARTHRITIS, LEFT WRIST	ICD-10 Diagnosis	M08.032
UNSPECIFIED JUVENILE RHEUMATOID ARTHRITIS, UNSPECIFIED WRIST	ICD-10 Diagnosis	M08.039
UNSPECIFIED JUVENILE RHEUMATOID ARTHRITIS, HAND	ICD-10 Diagnosis	M08.04
UNSPECIFIED JUVENILE RHEUMATOID ARTHRITIS, RIGHT HAND	ICD-10 Diagnosis	M08.041
UNSPECIFIED JUVENILE RHEUMATOID ARTHRITIS, LEFT HAND	ICD-10 Diagnosis	M08.042
UNSPECIFIED JUVENILE RHEUMATOID ARTHRITIS, UNSPECIFIED HAND	ICD-10 Diagnosis	M08.049
UNSPECIFIED JUVENILE RHEUMATOID ARTHRITIS, HIP	ICD-10 Diagnosis	M08.05
UNSPECIFIED JUVENILE RHEUMATOID ARTHRITIS, RIGHT HIP	ICD-10 Diagnosis	M08.051
UNSPECIFIED JUVENILE RHEUMATOID ARTHRITIS, LEFT HIP	ICD-10 Diagnosis	M08.052
UNSPECIFIED JUVENILE RHEUMATOID ARTHRITIS, UNSPECIFIED HIP	ICD-10 Diagnosis	M08.059
UNSPECIFIED JUVENILE RHEUMATOID ARTHRITIS, KNEE	ICD-10 Diagnosis	M08.06
UNSPECIFIED JUVENILE RHEUMATOID ARTHRITIS, RIGHT KNEE	ICD-10 Diagnosis	M08.061
UNSPECIFIED JUVENILE RHEUMATOID ARTHRITIS, LEFT KNEE	ICD-10 Diagnosis	M08.062
UNSPECIFIED JUVENILE RHEUMATOID ARTHRITIS, UNSPECIFIED KNEE	ICD-10 Diagnosis	M08.069
UNSPECIFIED JUVENILE RHEUMATOID ARTHRITIS, ANKLE AND FOOT	ICD-10 Diagnosis	M08.07
UNSPECIFIED JUVENILE RHEUMATOID ARTHRITIS, RIGHT ANKLE AND FOOT	ICD-10 Diagnosis	M08.071
UNSPECIFIED JUVENILE RHEUMATOID ARTHRITIS, LEFT ANKLE AND FOOT	ICD-10 Diagnosis	M08.072
UNSPECIFIED JUVENILE RHEUMATOID ARTHRITIS, UNSPECIFIED ANKLE AND FOOT	ICD-10 Diagnosis	M08.079
UNSPECIFIED JUVENILE RHEUMATOID ARTHRITIS, VERTEBRAE	ICD-10 Diagnosis	M08.08
UNSPECIFIED JUVENILE RHEUMATOID ARTHRITIS, MULTIPLE SITES	ICD-10 Diagnosis	M08.09
JUVENILE ANKYLOSING SPONDYLITIS	ICD-10 Diagnosis	M08.1
JUVENILE RHEUMATOID ARTHRITIS WITH SYSTEMIC ONSET	ICD-10 Diagnosis	M08.2
JUVENILE RHEUMATOID ARTHRITIS WITH SYSTEMIC ONSET, UNSPECIFIED SITE	ICD-10 Diagnosis	M08.20
JUVENILE RHEUMATOID ARTHRITIS WITH SYSTEMIC ONSET, SHOULDER	ICD-10 Diagnosis	M08.21
JUVENILE RHEUMATOID ARTHRITIS WITH SYSTEMIC ONSET, RIGHT SHOULDER	ICD-10 Diagnosis	M08.211
JUVENILE RHEUMATOID ARTHRITIS WITH SYSTEMIC ONSET, LEFT SHOULDER	ICD-10 Diagnosis	M08.212
JUVENILE RHEUMATOID ARTHRITIS WITH SYSTEMIC ONSET, UNSPECIFIED SHOULDER	ICD-10 Diagnosis	M08.219
JUVENILE RHEUMATOID ARTHRITIS WITH SYSTEMIC ONSET, ELBOW	ICD-10 Diagnosis	M08.22
JUVENILE RHEUMATOID ARTHRITIS WITH SYSTEMIC ONSET, RIGHT ELBOW	ICD-10 Diagnosis	M08.221
JUVENILE RHEUMATOID ARTHRITIS WITH SYSTEMIC ONSET, LEFT ELBOW	ICD-10 Diagnosis	M08.222
JUVENILE RHEUMATOID ARTHRITIS WITH SYSTEMIC ONSET, UNSPECIFIED ELBOW	ICD-10 Diagnosis	M08.229
JUVENILE RHEUMATOID ARTHRITIS WITH SYSTEMIC ONSET, WRIST	ICD-10 Diagnosis	M08.23
JUVENILE RHEUMATOID ARTHRITIS WITH SYSTEMIC ONSET, RIGHT WRIST	ICD-10 Diagnosis	M08.231
JUVENILE RHEUMATOID ARTHRITIS WITH SYSTEMIC ONSET, LEFT WRIST	ICD-10 Diagnosis	M08.232
JUVENILE RHEUMATOID ARTHRITIS WITH SYSTEMIC ONSET, UNSPECIFIED WRIST	ICD-10 Diagnosis	M08.239
JUVENILE RHEUMATOID ARTHRITIS WITH SYSTEMIC ONSET, HAND	ICD-10 Diagnosis	M08.24
JUVENILE RHEUMATOID ARTHRITIS WITH SYSTEMIC ONSET, RIGHT HAND	ICD-10 Diagnosis	M08.241
JUVENILE RHEUMATOID ARTHRITIS WITH SYSTEMIC ONSET, LEFT HAND	ICD-10 Diagnosis	M08.242
JUVENILE RHEUMATOID ARTHRITIS WITH SYSTEMIC ONSET, UNSPECIFIED HAND	ICD-10 Diagnosis	M08.249
JUVENILE RHEUMATOID ARTHRITIS WITH SYSTEMIC ONSET, HIP	ICD-10 Diagnosis	M08.25
JUVENILE RHEUMATOID ARTHRITIS WITH SYSTEMIC ONSET, RIGHT HIP	ICD-10 Diagnosis	M08.251
JUVENILE RHEUMATOID ARTHRITIS WITH SYSTEMIC ONSET, LEFT HIP	ICD-10 Diagnosis	M08.252
JUVENILE RHEUMATOID ARTHRITIS WITH SYSTEMIC ONSET, UNSPECIFIED HIP	ICD-10 Diagnosis	M08.259
JUVENILE RHEUMATOID ARTHRITIS WITH SYSTEMIC ONSET, KNEE	ICD-10 Diagnosis	M08.26
JUVENILE RHEUMATOID ARTHRITIS WITH SYSTEMIC ONSET, RIGHT KNEE	ICD-10 Diagnosis	M08.261
JUVENILE RHEUMATOID ARTHRITIS WITH SYSTEMIC ONSET, LEFT KNEE	ICD-10 Diagnosis	M08.262
JUVENILE RHEUMATOID ARTHRITIS WITH SYSTEMIC ONSET, UNSPECIFIED KNEE	ICD-10 Diagnosis	M08.269
JUVENILE RHEUMATOID ARTHRITIS WITH SYSTEMIC ONSET, ANKLE AND FOOT	ICD-10 Diagnosis	M08.27
JUVENILE RHEUMATOID ARTHRITIS WITH SYSTEMIC ONSET, RIGHT ANKLE AND FOOT	ICD-10 Diagnosis	M08.271
JUVENILE RHEUMATOID ARTHRITIS WITH SYSTEMIC ONSET, LEFT ANKLE AND FOOT	ICD-10 Diagnosis	M08.272
JUVENILE RHEUMATOID ARTHRITIS WITH SYSTEMIC ONSET, UNSPECIFIED ANKLE AND FOOT	ICD-10 Diagnosis	M08.279
JUVENILE RHEUMATOID ARTHRITIS WITH SYSTEMIC ONSET, VERTEBRAE	ICD-10 Diagnosis	M08.28
JUVENILE RHEUMATOID ARTHRITIS WITH SYSTEMIC ONSET, MULTIPLE SITES	ICD-10 Diagnosis	M08.29
JUVENILE RHEUMATOID POLYARTHRITIS (SERONEGATIVE)	ICD-10 Diagnosis	M08.3
PAUCIARTICULAR JUVENILE RHEUMATOID ARTHRITIS	ICD-10 Diagnosis	M08.4
PAUCIARTICULAR JUVENILE RHEUMATOID ARTHRITIS, UNSPECIFIED SITE	ICD-10 Diagnosis	M08.40
PAUCIARTICULAR JUVENILE RHEUMATOID ARTHRITIS, SHOULDER	ICD-10 Diagnosis	M08.41
PAUCIARTICULAR JUVENILE RHEUMATOID ARTHRITIS, RIGHT SHOULDER	ICD-10 Diagnosis	M08.411
PAUCIARTICULAR JUVENILE RHEUMATOID ARTHRITIS, LEFT SHOULDER	ICD-10 Diagnosis	M08.412
PAUCIARTICULAR JUVENILE RHEUMATOID ARTHRITIS, UNSPECIFIED SHOULDER	ICD-10 Diagnosis	M08.419
PAUCIARTICULAR JUVENILE RHEUMATOID ARTHRITIS, ELBOW	ICD-10 Diagnosis	M08.42
PAUCIARTICULAR JUVENILE RHEUMATOID ARTHRITIS, RIGHT ELBOW	ICD-10 Diagnosis	M08.421
PAUCIARTICULAR JUVENILE RHEUMATOID ARTHRITIS, LEFT ELBOW	ICD-10 Diagnosis	M08.422
PAUCIARTICULAR JUVENILE RHEUMATOID ARTHRITIS, UNSPECIFIED ELBOW	ICD-10 Diagnosis	M08.429
PAUCIARTICULAR JUVENILE RHEUMATOID ARTHRITIS, WRIST	ICD-10 Diagnosis	M08.43
PAUCIARTICULAR JUVENILE RHEUMATOID ARTHRITIS, RIGHT WRIST	ICD-10 Diagnosis	M08.431
PAUCIARTICULAR JUVENILE RHEUMATOID ARTHRITIS, LEFT WRIST	ICD-10 Diagnosis	M08.432
PAUCIARTICULAR JUVENILE RHEUMATOID ARTHRITIS, UNSPECIFIED WRIST	ICD-10 Diagnosis	M08.439
PAUCIARTICULAR JUVENILE RHEUMATOID ARTHRITIS, HAND	ICD-10 Diagnosis	M08.44
PAUCIARTICULAR JUVENILE RHEUMATOID ARTHRITIS, RIGHT HAND	ICD-10 Diagnosis	M08.441
PAUCIARTICULAR JUVENILE RHEUMATOID ARTHRITIS, LEFT HAND	ICD-10 Diagnosis	M08.442
PAUCIARTICULAR JUVENILE RHEUMATOID ARTHRITIS, UNSPECIFIED HAND	ICD-10 Diagnosis	M08.449
PAUCIARTICULAR JUVENILE RHEUMATOID ARTHRITIS, HIP	ICD-10 Diagnosis	M08.45
PAUCIARTICULAR JUVENILE RHEUMATOID ARTHRITIS, RIGHT HIP	ICD-10 Diagnosis	M08.451
PAUCIARTICULAR JUVENILE RHEUMATOID ARTHRITIS, LEFT HIP	ICD-10 Diagnosis	M08.452
PAUCIARTICULAR JUVENILE RHEUMATOID ARTHRITIS, UNSPECIFIED HIP	ICD-10 Diagnosis	M08.459
PAUCIARTICULAR JUVENILE RHEUMATOID ARTHRITIS, KNEE	ICD-10 Diagnosis	M08.46
PAUCIARTICULAR JUVENILE RHEUMATOID ARTHRITIS, RIGHT KNEE	ICD-10 Diagnosis	M08.461
PAUCIARTICULAR JUVENILE RHEUMATOID ARTHRITIS, LEFT KNEE	ICD-10 Diagnosis	M08.462
PAUCIARTICULAR JUVENILE RHEUMATOID ARTHRITIS, UNSPECIFIED KNEE	ICD-10 Diagnosis	M08.469
PAUCIARTICULAR JUVENILE RHEUMATOID ARTHRITIS, ANKLE AND FOOT	ICD-10 Diagnosis	M08.47
PAUCIARTICULAR JUVENILE RHEUMATOID ARTHRITIS, RIGHT ANKLE AND FOOT	ICD-10 Diagnosis	M08.471
PAUCIARTICULAR JUVENILE RHEUMATOID ARTHRITIS, LEFT ANKLE AND FOOT	ICD-10 Diagnosis	M08.472
PAUCIARTICULAR JUVENILE RHEUMATOID ARTHRITIS, UNSPECIFIED ANKLE AND FOOT	ICD-10 Diagnosis	M08.479
PAUCIARTICULAR JUVENILE RHEUMATOID ARTHRITIS, VERTEBRAE	ICD-10 Diagnosis	M08.48
OTHER JUVENILE ARTHRITIS	ICD-10 Diagnosis	M08.8
OTHER JUVENILE ARTHRITIS, UNSPECIFIED SITE	ICD-10 Diagnosis	M08.80
OTHER JUVENILE ARTHRITIS, SHOULDER	ICD-10 Diagnosis	M08.81
OTHER JUVENILE ARTHRITIS, RIGHT SHOULDER	ICD-10 Diagnosis	M08.811
OTHER JUVENILE ARTHRITIS, LEFT SHOULDER	ICD-10 Diagnosis	M08.812
[truncated: 5,187 more rows]
